# Supplementary material for: Gas-phase synthesis of 3-carboethoxy-quinolin-4-ones. A comprehensive computational mechanistic study to uncover the dark side of the Gould–Jacobs reaction
Source: Royal Society of Chemistry journal article supplement (doi:10.1039/c6ra11986g), 2016-01-01
Supplement: c6ra11986g1.pdf [file c6ra11986g1.pdf]

## Electronic Supplementary Information

### Gas-phase synthesis of 3-carboethoxy-quinolin-4-ones. A comprehensive computational mechanistic study to uncover the dark side of the Gould-Jacobs reaction

Ivana Malvacio, E. Laura Moyano and D. Mariano A. Vera\*

**Abstract.** A set of 3-carboethoxy-quinolin-4-ones has been synthesized from diethyl 2-((arylamino)methylene) malonates through a Gould-Jacobs (G-J) cyclization using the flash vacuum pyrolysis (FVP) method. Mechanistic studies including calculations at first principles DFT and Coupled Cluster (CCSD(T)) levels of theory, along with insightful experiments, have been gathered to shed light on the complex multi-step process to afford quinolones. The G-J cyclization proceeded through a unimolecular process involving reactive species as iminoketenes, an azetinone and a quinolin-4(4*aH*)-one intermediates. The reaction was rate limited by a proton shift step in the pathway which leads to the final tautomeric product. In the gas phase pyrolysis of starting malonates, along with the expected 3-carboethoxy-quinolin-4-ones, 3-unsubstituted-quinolin-4-ones were obtained, and the ratio between these products was strongly dependent on the nature of the arylamino group. In order to explain the deethoxycarbonylation reaction, DFT and *ab initio* calculations were also accomplished.

## PART I. Experimental details and substance characterization data

### General procedure for the study of diethyl 2-((phenylamino)methylene) malonates (3a-f) cyclization under FVP conditions.

FVP reactions were carried out in a Thermolyne 21100 furnace using a vycor glass of 30 cm long and a 1.2 cm i.d. reactor (Figure 1). Temperatures were 250-500°C, being 330°C the optimized temperature, pressures of  $10^{-2}$  Torr, contact times were  $10^{-2}$  s, total reaction time 1 h and sample amounts were ~20 mg (0.076 – 0.051 mmol). After the experiments were completed, the pyrolysate was collected in a liquid N<sub>2</sub> trap and extracted with acetone. The solid product/s was/were filtered. Finally, both solid and soluble products were submitted to conventional analysis (<sup>1</sup>H NMR, <sup>13</sup>C NMR and GC/MS).

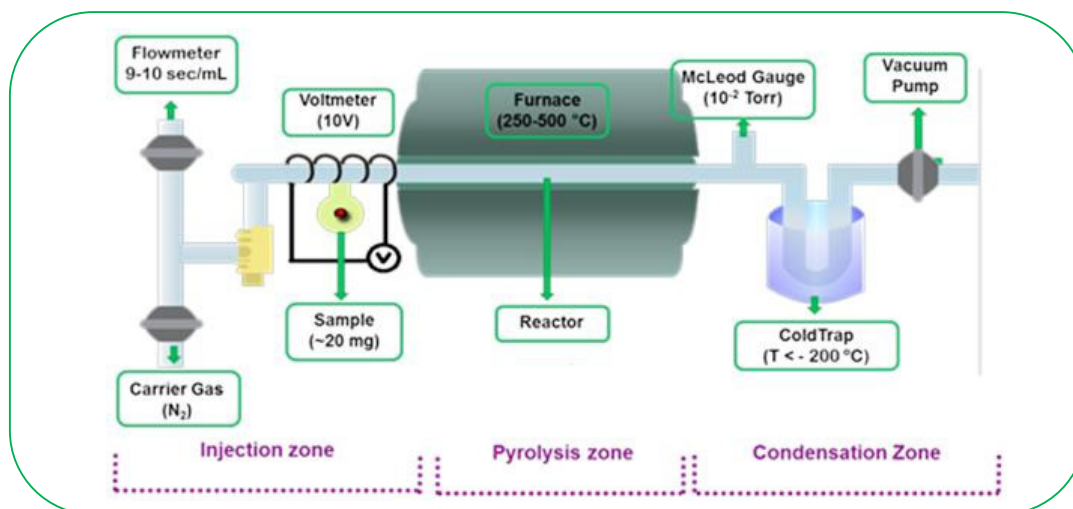

Figure S1. Flash Vacuum Pyrolysis reactor.

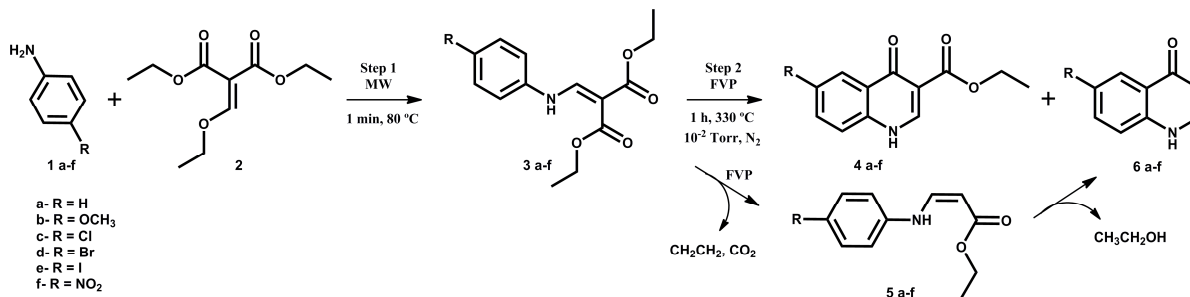

Scheme S1. Formation of 4-quinolone derivatives under FVP.

## CHARACTERIZATION OF FVP REACTANTS

$^1\text{H}$ ,  $^{13}\text{C}$  NMR spectra were recorded on a Bruker Advance II 400 ( $^1\text{H}$  at 400,  $^{13}\text{C}$  at 100 MHz) using  $\text{CDCl}_3$ ,  $\text{DMSO-}d_6$  and  $\text{TFA-}d_1$  as solvents. Chemical shifts are reported in parts per million (ppm) downfield from TMS.

### Diethyl 2-(((4-methoxyphenyl)amino)methylene)malonate (**3b**)

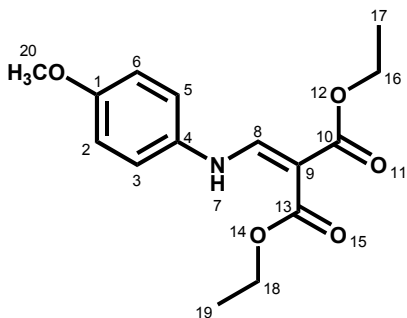

$\text{C}_{15}\text{H}_{19}\text{NO}_5$   
Molecular Weight: 293.32 g/mol  
Description: yellow liquid

$^1\text{H}$  NMR spectrum in  $\text{CDCl}_3$  (400 MHz)

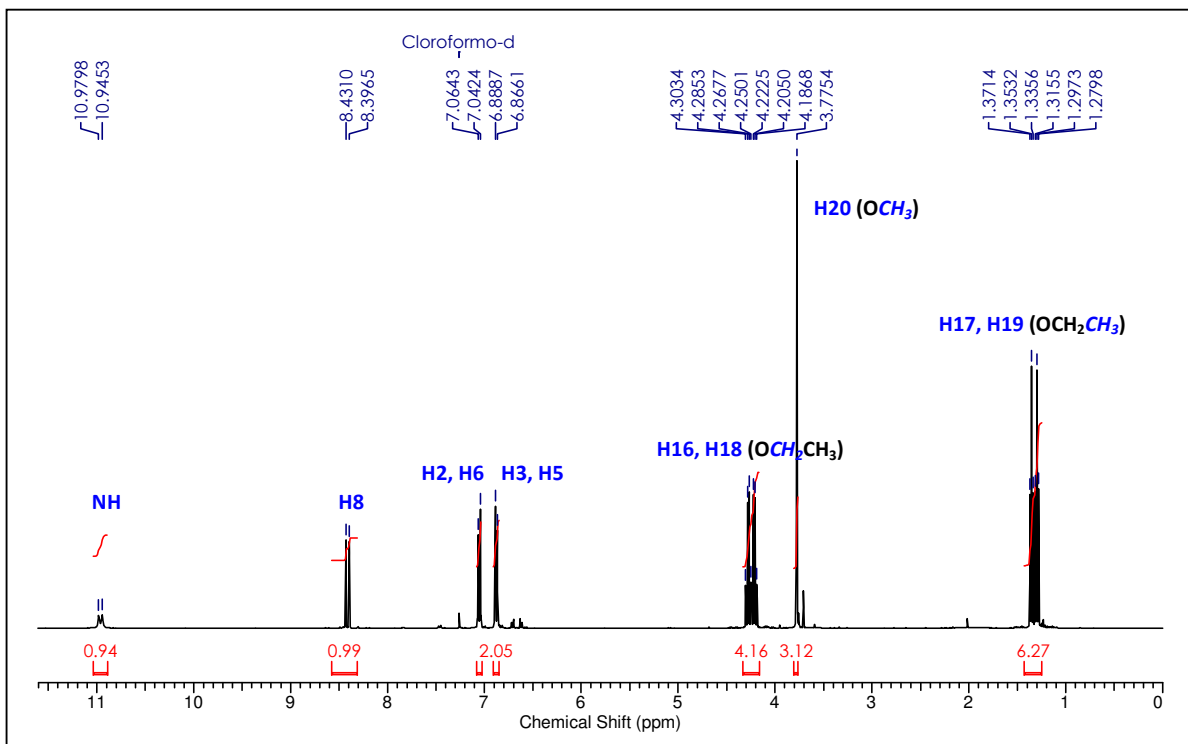

$\delta$  (ppm) : 1.29 (t, 3H,  $J=7.14$  Hz); 1.35 (t, 3H,  $J=7.16$  Hz); 3.77 (s, 3H); 4.21 (q, 2H,  $J=7.14$  Hz); 4.27 (q, 2H,  $J=7.11$  Hz); 6.87 (d, 2H,  $J=9.04$  Hz); 7.05 (d, 2H,  $J=8.76$  Hz); 8.41 (d, 1H,  $J=13.80$  Hz); 10.95 (d, 1H,  $J=13.80$  Hz).

<sup>13</sup>C NMR spectrum in CDCl<sub>3</sub> (100 MHz)

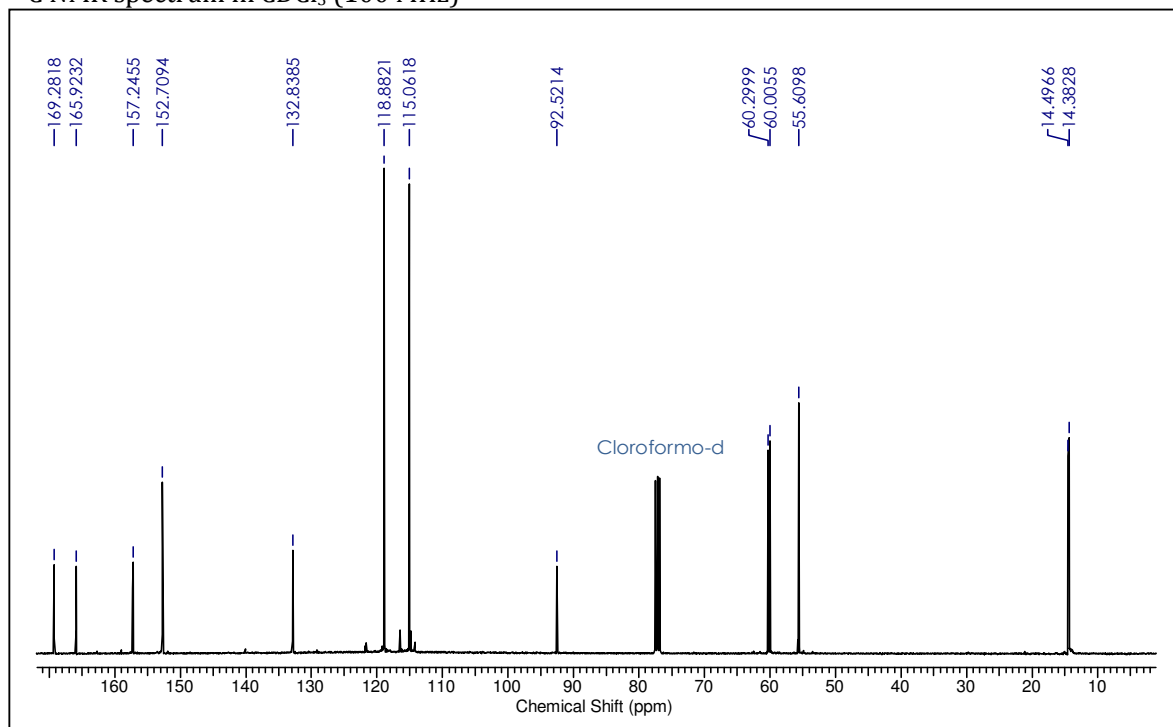

$\delta$  (ppm) : 14.38; 14.50; 55.61; 60.00; 60.30; 92.52; 115.06; 118.88; 132.84; 152.71; 157.24; 165.92; 169.28.

### Diethyl 2-(((4-chlorophenyl)amino)methylene)malonate (3c)

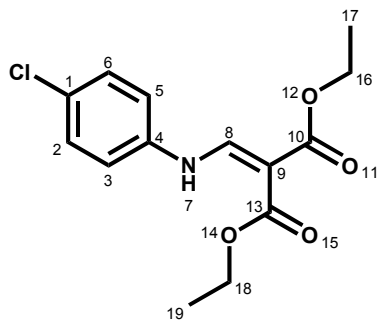

$C_{14}H_{16}ClNO_4$   
Molecular Weight: 297.73 g/mol  
Description: beige solid

$^1H$  NMR spectrum in  $CDCl_3$  (400 MHz)

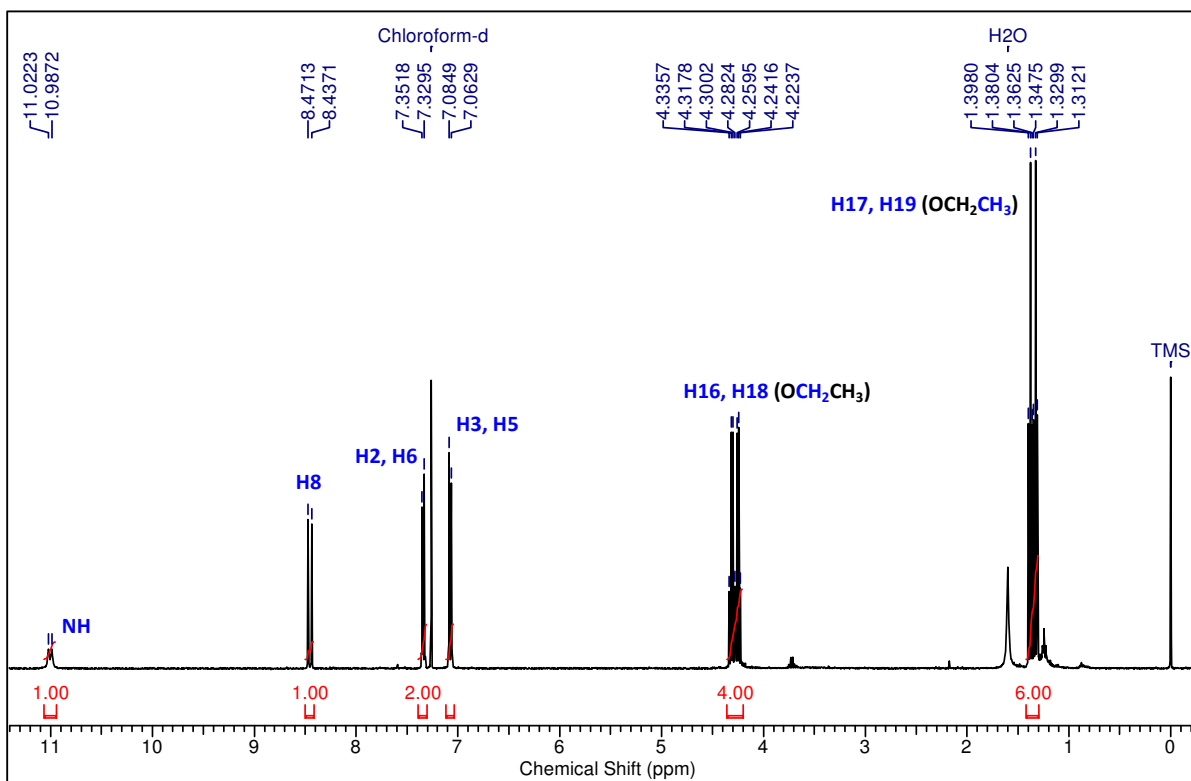

$\delta$  (ppm) : 1.33 (t, 3H,  $J$ = 7.08 Hz); 1.38 (t, 3H,  $J$ = 7.10 Hz); 4.25 (q, 2H,  $J$ = 7.15 Hz); 4.31 (q, 2H,  $J$ = 7.11 Hz); 7.07 (d, 2H,  $J$ = 8.80 Hz); 7.34 (d, 2H,  $J$ = 8.92 Hz); 8.45 (d, 1H,  $J$ = 13.68 Hz); 11.00 (d, 1H,  $J$ = 14.04 Hz).

$^{13}\text{C}$  NMR spectrum in  $\text{CDCl}_3$  (100 MHz)

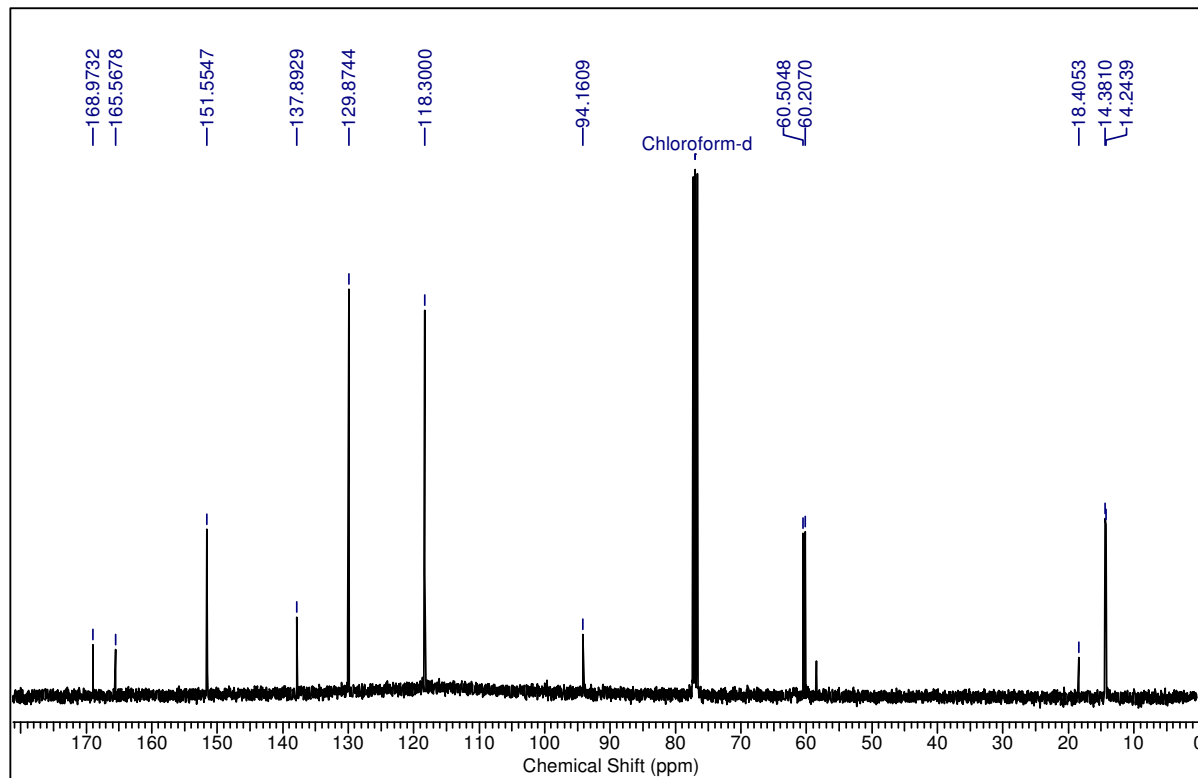

$\delta$  (ppm): 14.24; 14.38; 18.40; 60.21; 60.50; 94.16; 118.30; 129.87; 137.89; 151.55; 165.57; 168.97.

### Diethyl 2-(((4-bromophenyl)amino)methylene)malonate (3d)

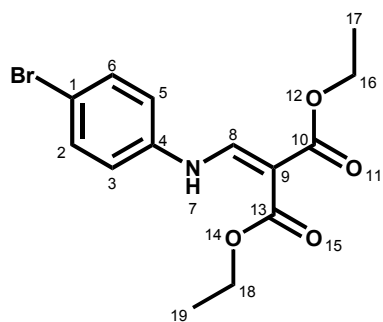

C<sub>14</sub>H<sub>16</sub>BrNO<sub>4</sub>

Molecular Weight: 342.19 g/mol

Description: beige solid

<sup>1</sup>H NMR spectrum in CDCl<sub>3</sub> (400 MHz)

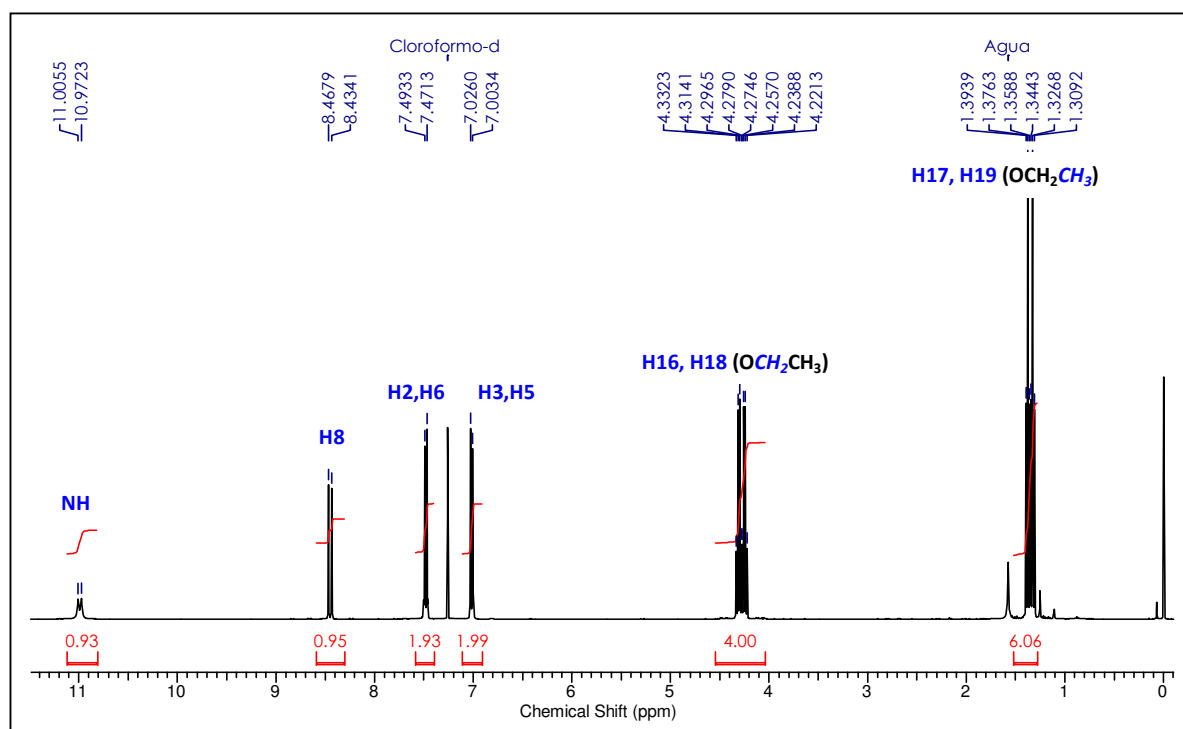

$\delta$  (ppm) : 1.32 (t, 3H,  $J=7.02$  Hz); 1.37 (t, 3H,  $J=7.02$  Hz); 4.24 (q, 2H,  $J=7.11$  Hz); 4.30 (q, 2H,  $J=7.11$  Hz); 7.01 (d, 2H,  $J=9.04$  Hz); 7.48 (d, 2H,  $J=8.80$  Hz); 8.44 (d, 2H,  $J=13.52$  Hz); 10.99 (d, 1H,  $J=13.28$  Hz)

$^{13}\text{C}$  NMR spectrum in  $\text{CDCl}_3$  (100 MHz)

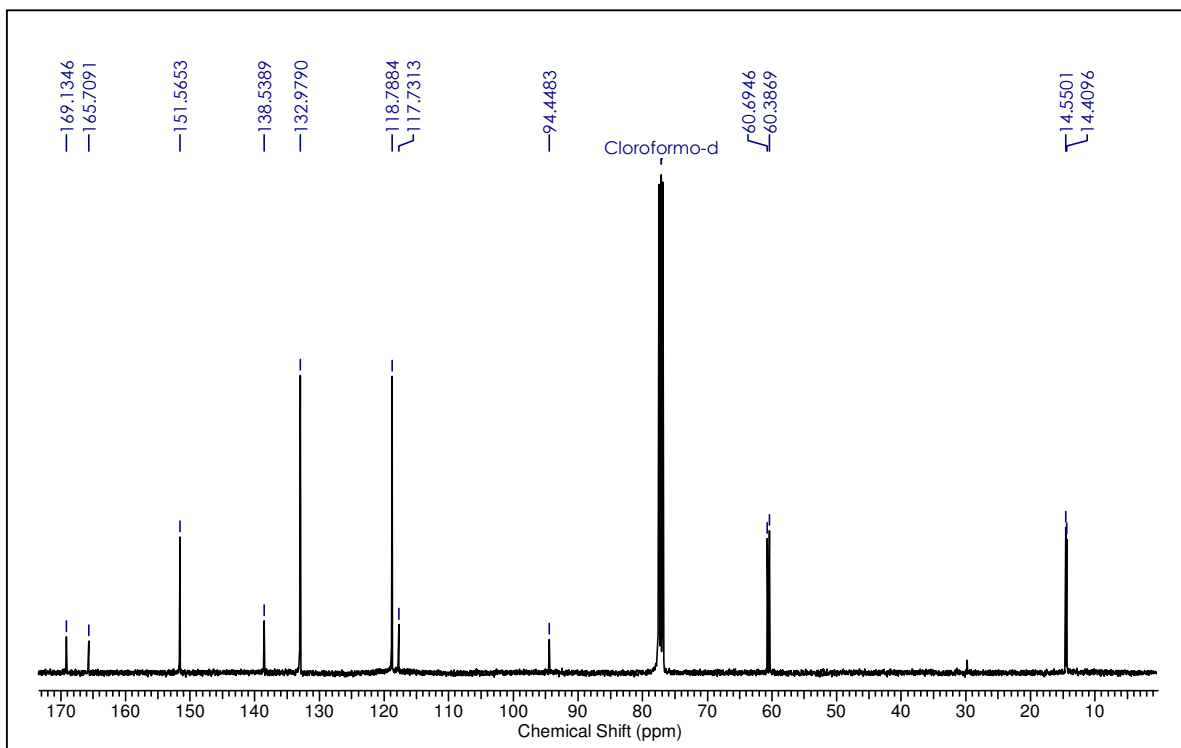

$\delta$  (ppm): 14.41; 14.55; 60.39; 60.69; 94.44; 117.73; 118.78; 132.98; 138.54; 151.56; 165.71; 169.13.



### Diethyl 2-(((4-iodophenyl)amino)methylene)malonate (3e)

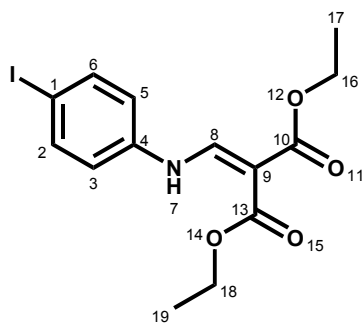

$C_{14}H_{16}INO_4$   
Molecular Weight: 389.19 g/mol  
Description: beige solid

$^1H$  NMR spectrum in  $CDCl_3$  (400 MHz)

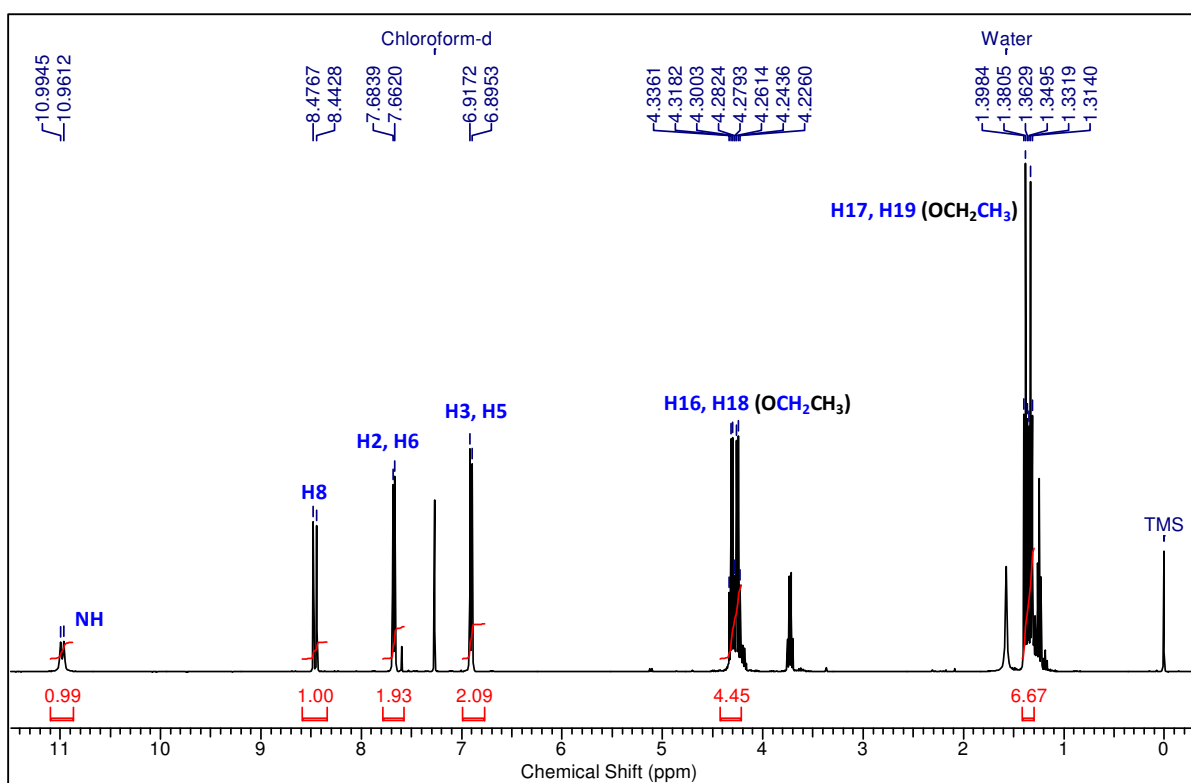

$\delta$  (ppm) : 1.33 (t, 3H,  $J=7.10$  Hz); 1.38 (t, 3H,  $J=7.10$  Hz); 4.25 (q, 2H,  $J=7.11$  Hz); 4.31 (q, 2H,  $J=7.16$  Hz); 6.91 (d, 2H,  $J=8.76$  Hz); 7.67 (d, 2H,  $J=8.76$  Hz); 8.46 (d, 2H,  $J=13.56$  Hz); 10.98 (d, 1H,  $J=13.32$  Hz)

$^{13}\text{C}$  NMR spectrum in  $\text{CDCl}_3$  (100 MHz)

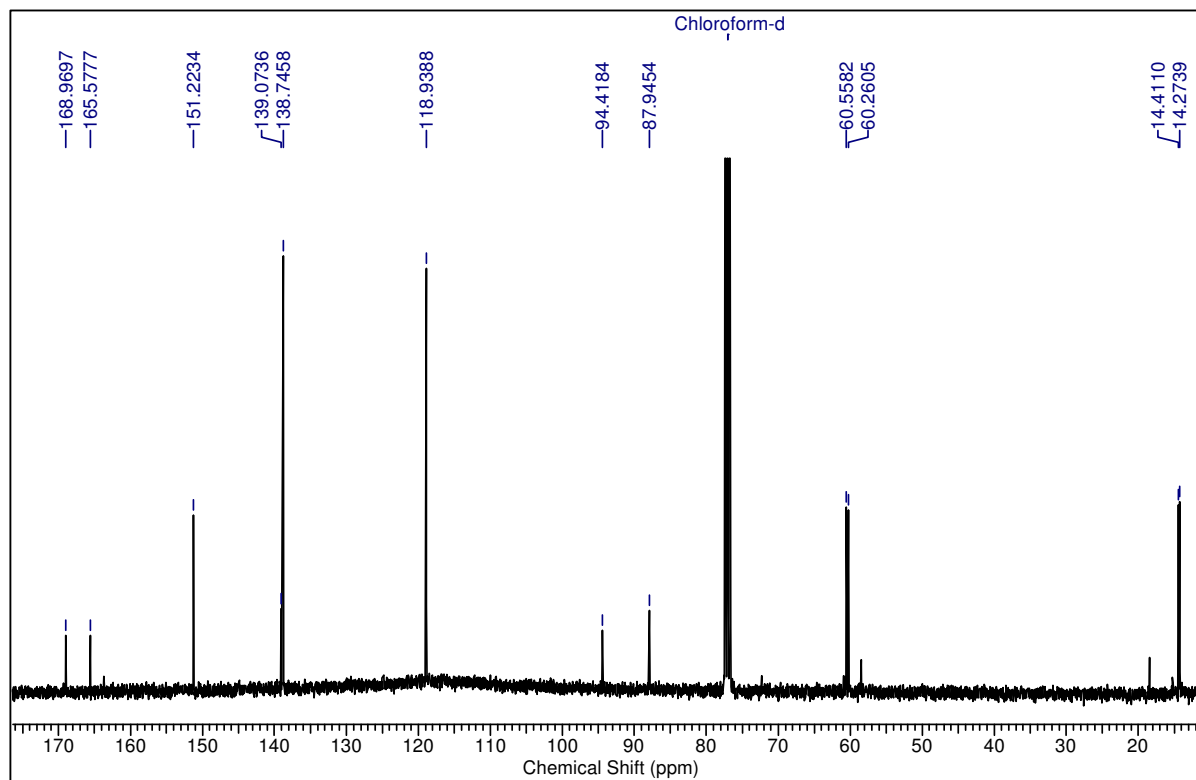

$\delta_{(\text{ppm})}$ : 14.27; 14.41; 60.26; 60.56; 87.94; 94.42; 118.94; 138.74; 139.07; 151.22; 165.58; 168.97.

## Diethyl 2-(((4-nitrophenyl)amino)methylene)malonate (3f)

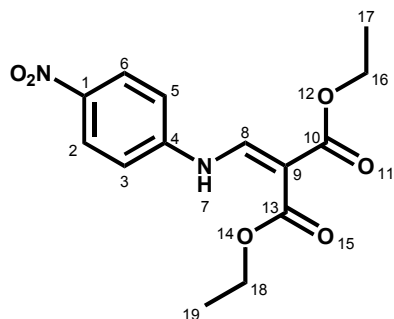

$C_{14}H_{16}N_2O_6$   
Molecular Weight: 308.29 g/mol  
Description: yellow solid

$^1H$  NMR spectrum in  $CDCl_3$  (400 MHz)

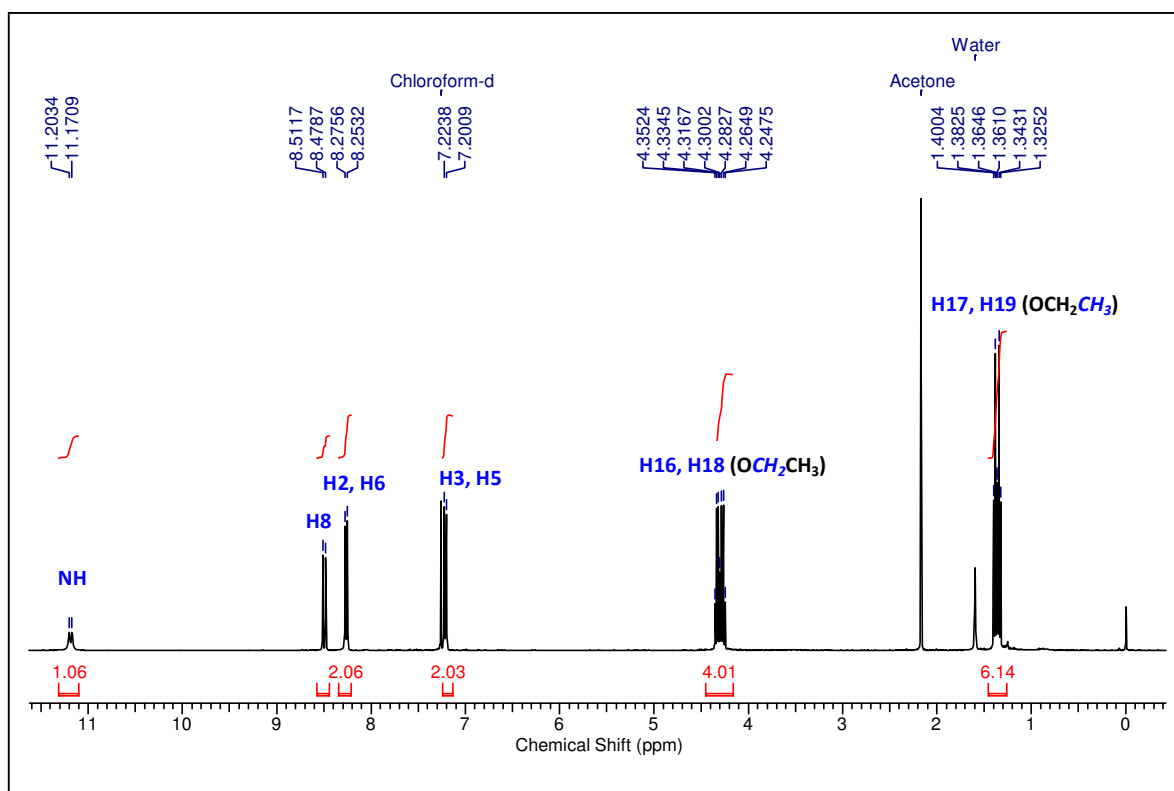

$\delta$  (ppm) : 1.34 (t, 3H,  $J=7.16$  Hz); 1.38 (t, 3H,  $J=7.16$  Hz); 4.27 (q, 2H,  $J=7.05$  Hz); 4.32 (q, 2H,  $J=6.96$  Hz); 7.21 (d, 2H,  $J=9.16$  Hz); 8.26 (d, 2H,  $J=8.96$  Hz); 8.49 (d, 1H,  $J=13.20$  Hz); 11.18 (d, 1H,  $J=13.00$  Hz).

$^{13}\text{C}$  NMR spectrum in  $\text{CDCl}_3$  (100 MHz)

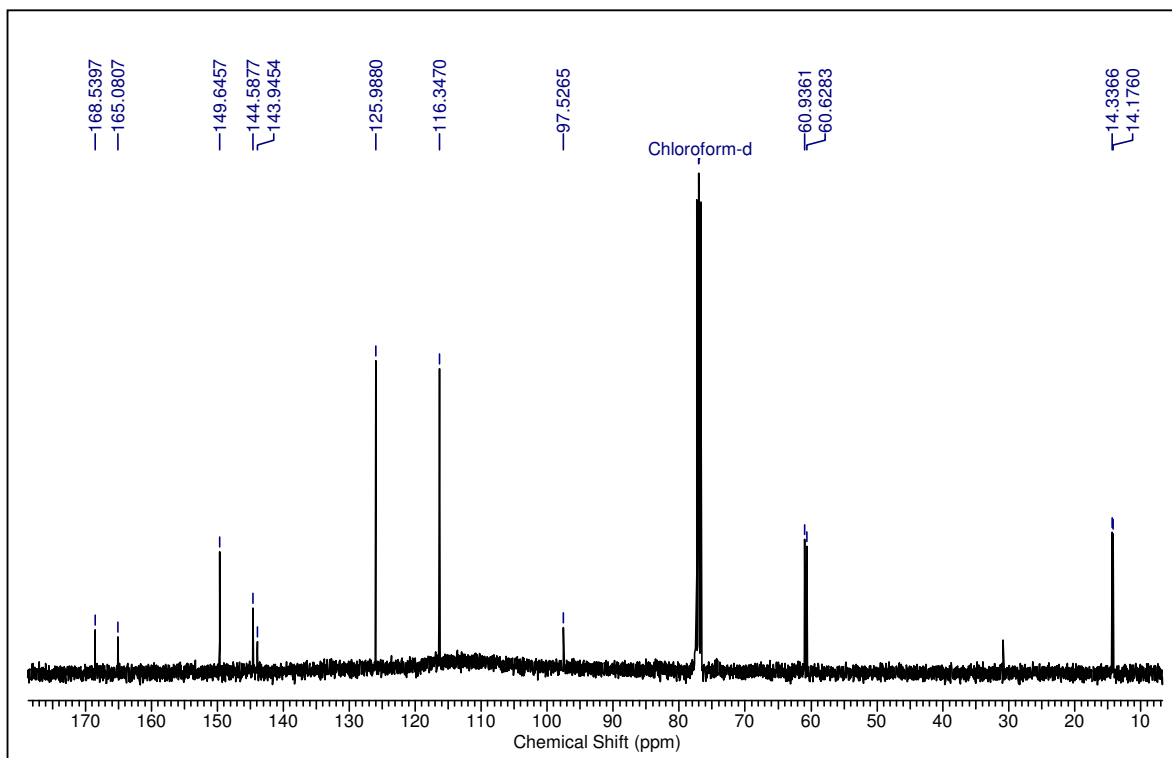

$\delta$  (ppm) : 14.18; 60.63; 60.94; 97.53; 116.35; 125.99; 143.94; 144.59; 149.64; 165.08; 168.54.

## CHARACTERIZATION OF PRODUCTS IN THE INSOLUBLE FRACTION (IF)

### Ethyl 4-oxo-1,4-dihydroquinoline-3-carboxylate (4a) and quinolin-4(1H)-one (6a)

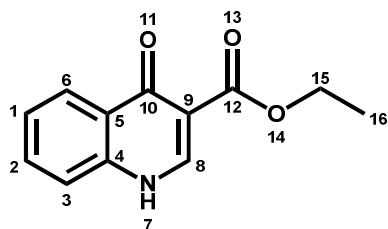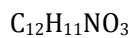

Molecular Weight: 217.22 g/mol

Description: white solid

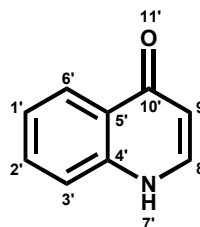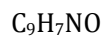

Molecular Weight: 145.16 g/mol

Description: white solid

$^1H$  NMR spectrum in TFA-*d* (400 MHz)

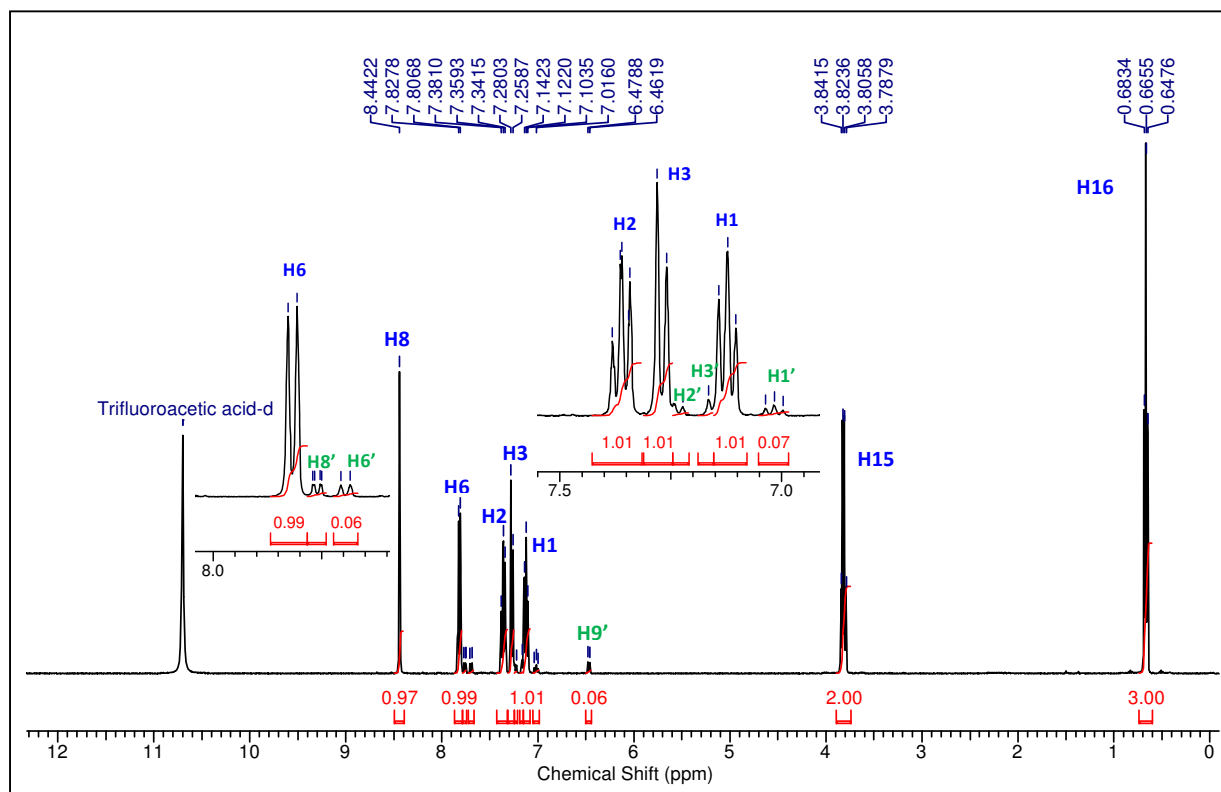

$\delta$  (ppm) **4a**: 0.67 (t, 3H,  $J$  = 7.16 Hz); 3.82 (q, 2H,  $J$  = 7.15 Hz); 7.12 (t, 1H,  $J$  = 7.76 Hz); 7.27 (d, 1H,  $J$  = 8.64 Hz); 7.36 (t, 1H,  $J$  = 7.50 Hz); 7.82 (d, 1H,  $J$  = 8.29 Hz); 8.44 (s, 1H).

$\delta$  (ppm) **6a**: 6.47 (dd, 1H,  $J$  = 1.63 and 6.66 Hz); 7.02 (t, 1H,  $J$  = 7.64 Hz); 7.14-7.17 (m, 1H); 7.21-7.24 (m, 1H); 7.69 (d, 1H,  $J$  = 8.45 Hz); 7.76 (dd, 1H,  $J$  = 1.60 and 6.80 Hz).

**Ethyl 6-methoxy-4-oxo-1,4-dihydroquinoline-3-carboxylate (4b) and 6-methoxyquinolin-4(1H)-one (6b)**

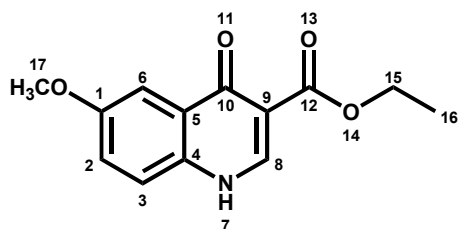

$C_{13}H_{13}NO_4$

Molecular Weight: 247.25 g/mol

Description: white solid

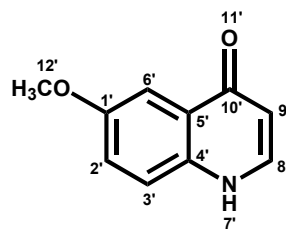

$C_{10}H_9NO_2$

Molecular Weight: 175.18 g/mol

Description: white solid

$^1H$  NMR spectrum in TFA-*d* (400 MHz)

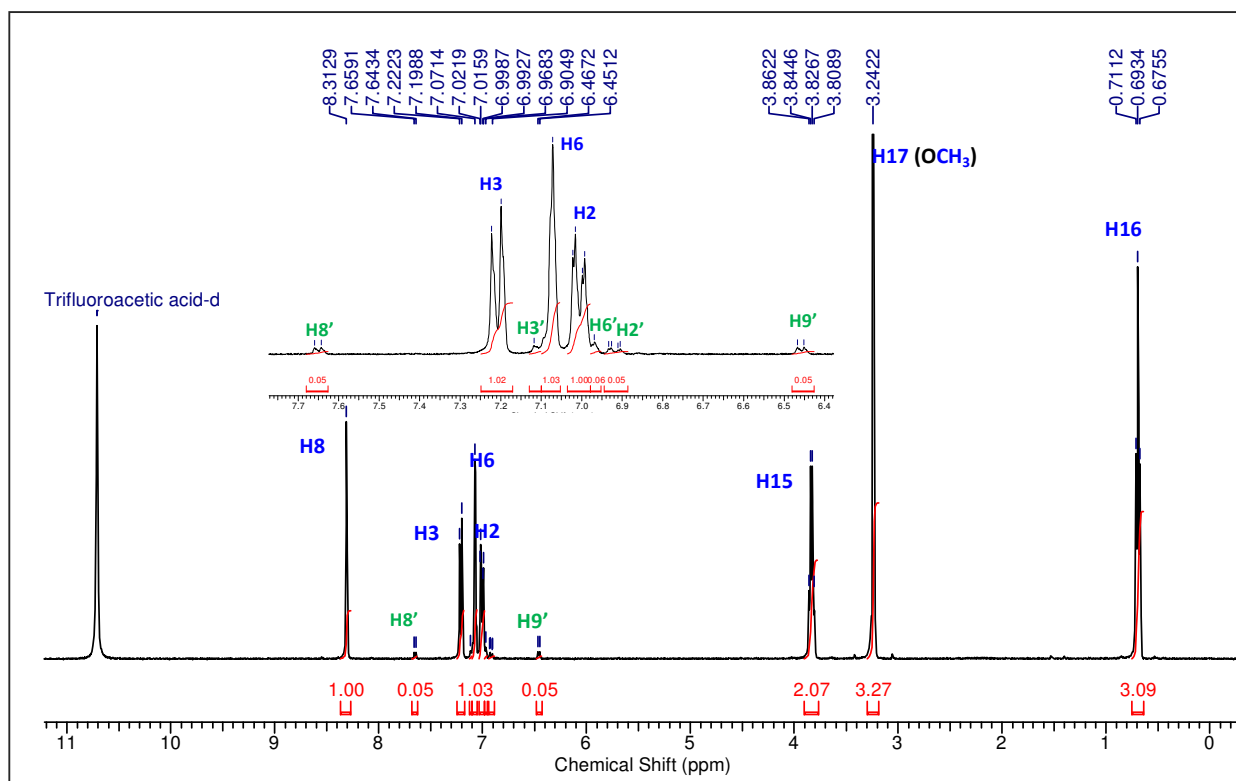

$\delta$  (ppm) **4b**: 0.69 (t, 3H,  $J$  = 7.14 Hz); 3.24 (s, 3H); 3.83 (q, 2H,  $J$  = 7.11 Hz); 7.00 (dd, 1H,  $J$  = 2.63 and 9.44 Hz); 7.07 (s, 1H); 7.21 (dd, 1H,  $J$  = 2.27 and 9.36 Hz); 8.31 (s, 1H).

$\delta$  (ppm) **6b**: 6.46 (d, 1H,  $J$  = 6.40 Hz); 6.92 (dd, 1H,  $J$  = 2.58 and 8.70 Hz); 6.95-6.98 (m, 1H); 7.10-7.12 (m, 1H); 7.65 (d, 1H,  $J$  = 6.46 Hz).

<sup>13</sup>C NMR spectrum in TFA-d (100 MHz)

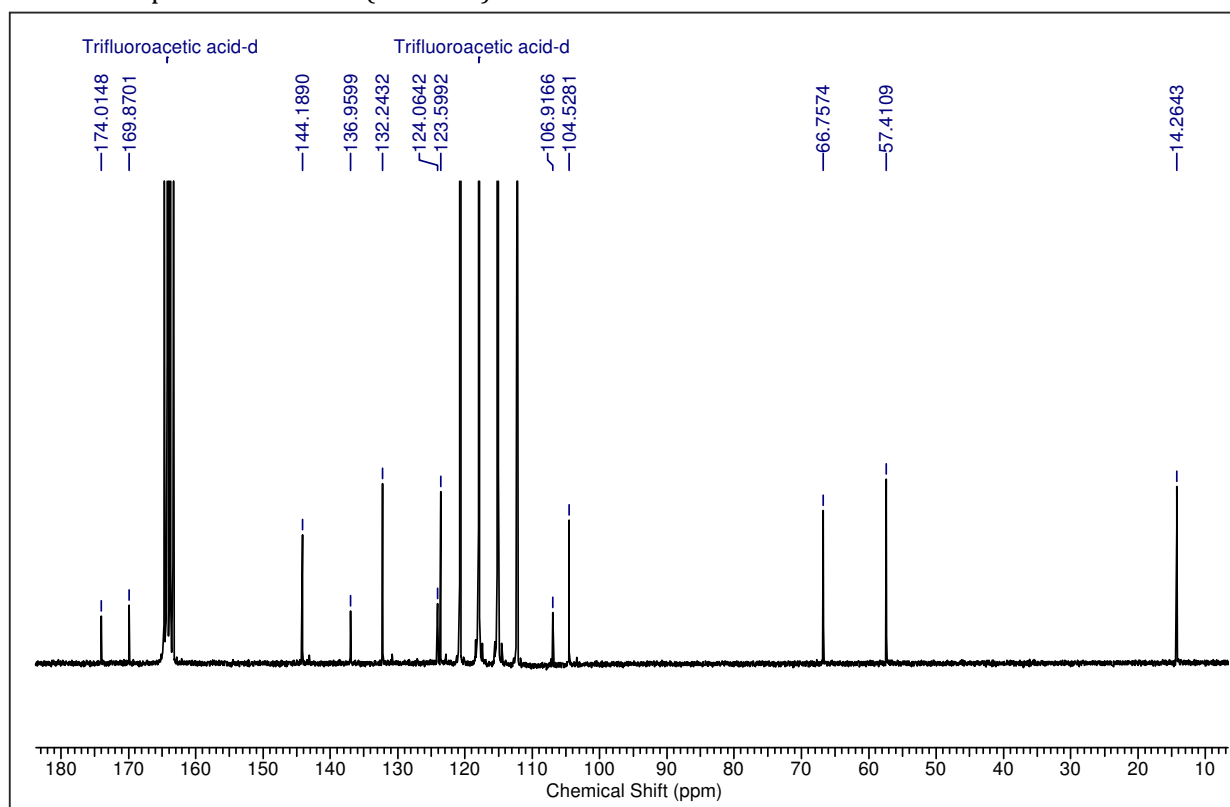

$\delta$  (ppm) : 14.26; 57.41; 66.75; 104.53; 106.92; 123.60; 124.06; 132.24; 136.96; 144.19; 169.87; 174.01.

**Ethyl 6-chloro-4-oxo-1,4-dihydroquinoline-3-carboxylate (4c) and 6-chloroquinolin-4(1H)-one (6c)**

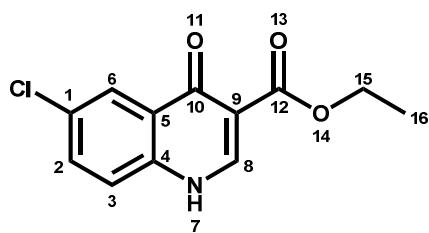

$C_{12}H_{10}ClNO_3$   
Molecular Weight: 251.67 g/mol  
Description: white solid

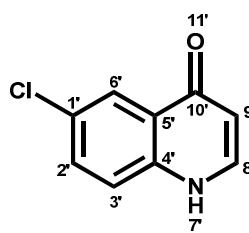

$C_9H_6ClNO$   
Molecular Weight: 179.60 g/mol  
Description: white solid

$^1H$  NMR spectrum in TFA-*d* (400 MHz)

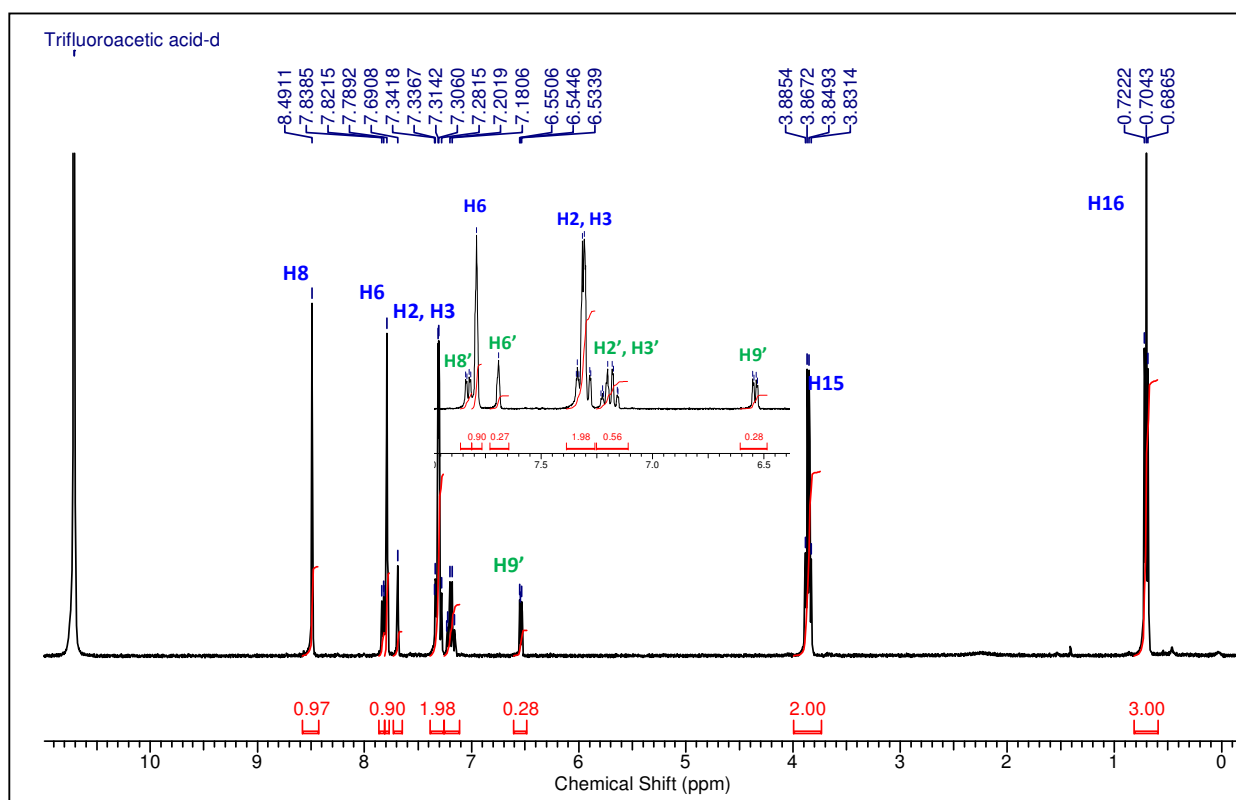

$\delta_{(ppm)}$  **4c**: 0.70 (t, 3H,  $J=7.14$  Hz); 3.86 (q, 2H,  $J=7.20$  Hz); 7.27-7.35 (m, 2H); 7.79 (s, 1H); 8.49 (s, 1H).

$\delta_{(ppm)}$  **6c**: 6.54 (dd, 1H,  $J=1.94$  and 7.00 Hz); 7.20 (q, 2H,  $J=8.94$  Hz); 7.69 (t, 1H,  $J=2.20$ ); 7.83 (dd, 1H,  $J=2.18$  and 6.90 Hz).



<sup>13</sup>C NMR spectrum in TFA-d (100 MHz)

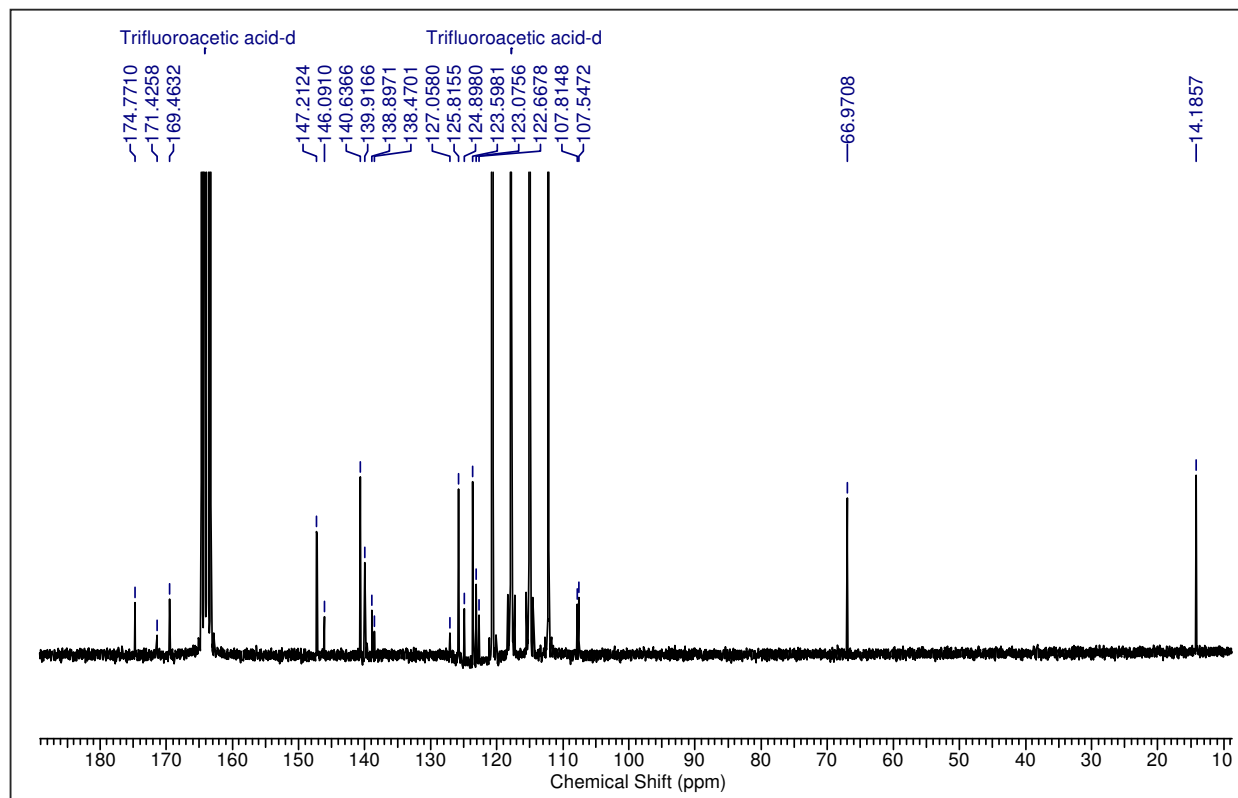

$\delta$  (ppm) : 14.19; 66.97; 107.55; 107.84; 122.67; 123.07; 123.60; 124.90; 125.81; 127.06; 138.47; 138.90; 139.92; 140.64; 146.09; 147.21; 169.46; 171.42; 174.77.

**Ethyl 6-iodo-4-oxo-1,4-dihydroquinoline-3-carboxylate (4e) and 6-iodoquinolin-4(1H)-one (6e)**

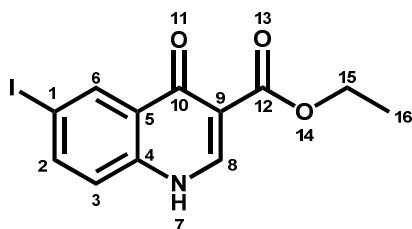

$C_{12}H_{10}INO_3$

Molecular Weight: 343.12 g/mol

Description: white solid

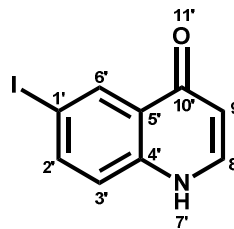

$C_9H_6INO$

Molecular Weight: 271.05 g/mol

Description: white solid

$^1H$  NMR spectrum in TFA-*d* (400 MHz)

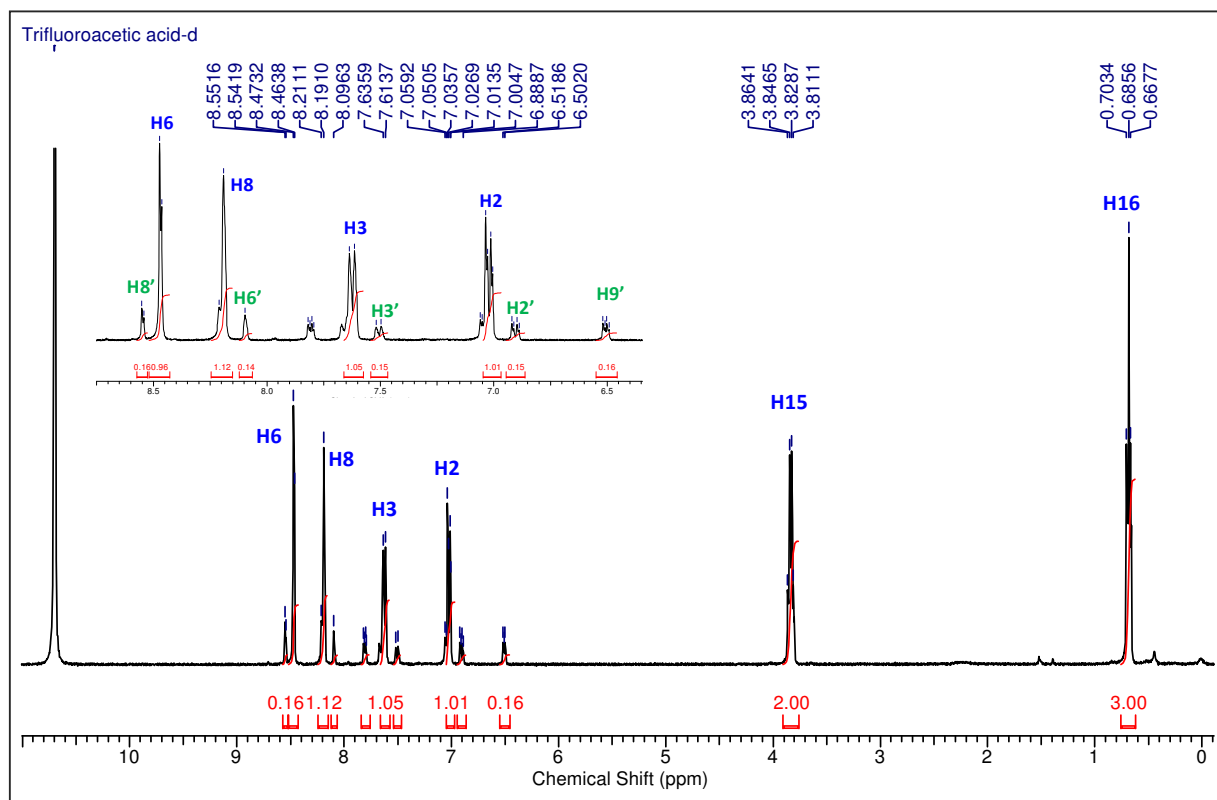

$\delta$  (ppm) **4e**: 0.68 (t, 3H,  $J$ = 7.14 Hz); 3.84 (q, 2H,  $J$ = 7.07 Hz); 7.02 (dd, 1H,  $J$ = 3.52 and 8.88 Hz); 7.62 (d, 1H,  $J$ = 8.87 Hz); 8.19 (s, 1H); 8.47 (d, 1H,  $J$ = 3.58 Hz).

$\delta$  (ppm) **6e**: 6.50 (dd, 1H,  $J$ = 3.33 and 6.40 Hz); 6.90 (dd, 1H,  $J$ = 3.40 and 9.10 Hz); 7.51 (d, 1H,  $J$ = 8.74 Hz); 8.10 (s, 1H); 8.55 (d, 1H,  $J$ = 3.60 Hz).

**Ethyl 6-nitro-4-oxo-1,4-dihydroquinoline-3-carboxylate (4f) and 6-nitroquinolin-4(1H)-one (6f)**

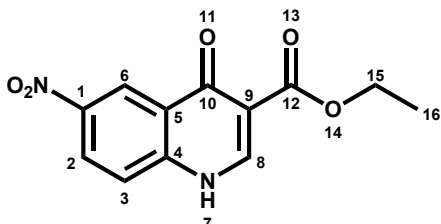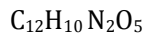

Molecular Weight: 262.22 g/mol

Description: yellow solid

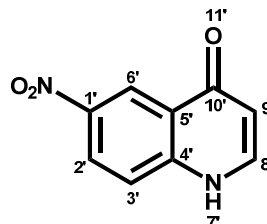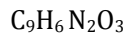

Molecular Weight: 190.16 g/mol

Description: yellow solid

$^1H$  NMR spectrum in DMSO- $d_6$  (400 MHz)

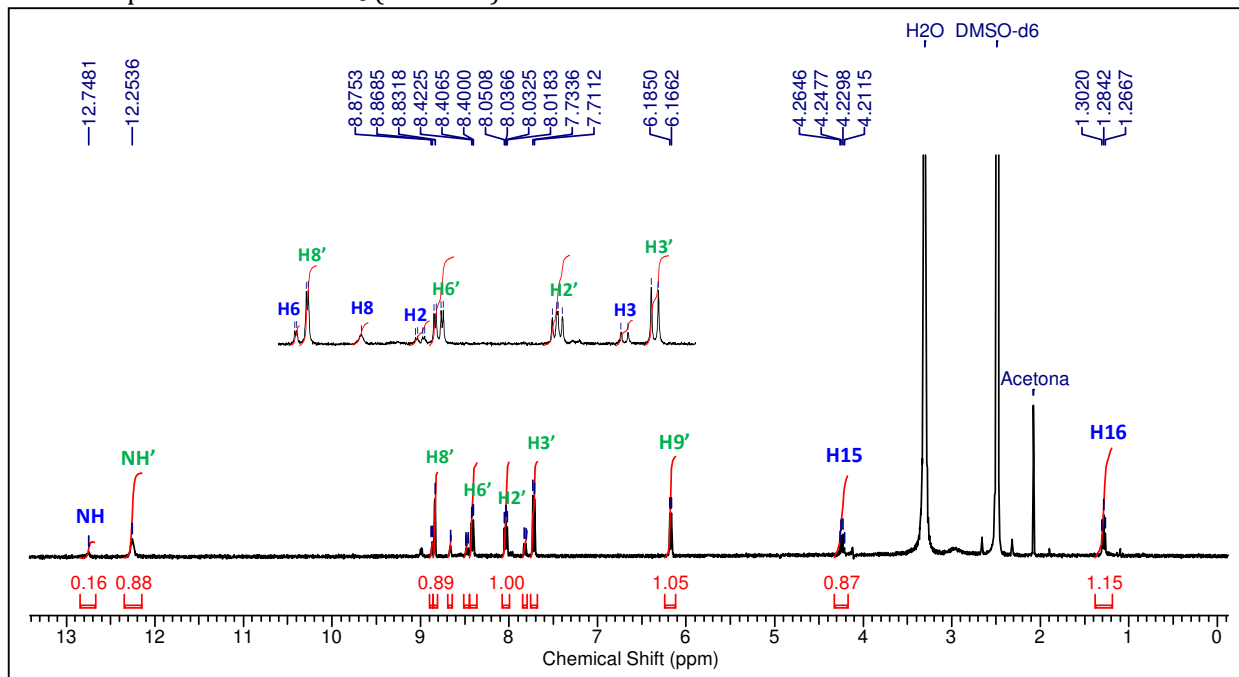

$\delta$  (ppm) **4f**: 1.28 (t, 3H,  $J$  = 7.06 Hz); 4.24 (q, 2H,  $J$  = 7.08 Hz); 7.82 (d, 1H,  $J$  = 8.97 Hz); 8.47 (dd, 1H,  $J$  = 2.70 and 9.18 Hz); 8.65 (s, 1H); 8.87 (d, 1H,  $J$  = 2.72 Hz); 12.75 (s, 1H).

$\delta$  (ppm) **6f**: 6.17 (d, 1H,  $J$  = 7.61 Hz); 7.72 (d, 1H,  $J$  = 9.15 Hz); 8.03 (dd, 1H,  $J$  = 5.65 and 7.72 Hz); 8.41 (dd, 1H,  $J$  = 2.68 and 9.08 Hz); 8.83 (d, 1H,  $J$  = 2.56); 12.25 (s, 1H).

## CHARACTERIZATION OF PRODUCTS IN THE SOLUBLE FRACTION (SF)

### Minority products found in FVP reactions

In some reactions, especially at high temperatures, **5c** was detected by GC/MS.

The decarboxylated quinolone **6c** was characterized by <sup>1</sup>H NMR analysis after collecting enough mass from 16 reactions and running preparative TLC to isolate it.

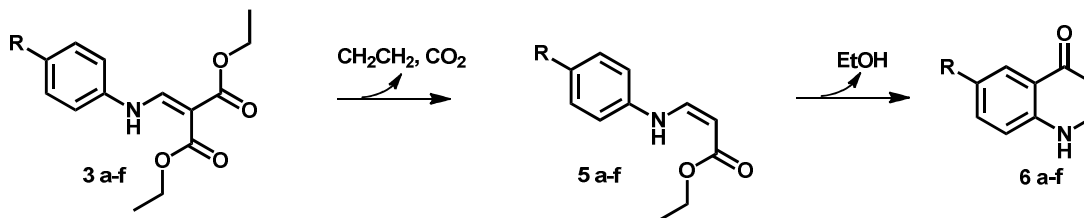

**Scheme S2.** Secondary reaction observed under FVP conditions.

Gas chromatography/mass spectrometry (GC/MS) analyses were performed in a Shimadzu CG-MS-QP 5050A spectrometer equipped with a VF column, using Helium as eluent at a flow rate of 1.1 mL/min with a heating ramp of 15 °C/min from 80 °C to 280 °C. Mass spectra were obtained in electron impact mode (EI) with 70 eV ionization energy.

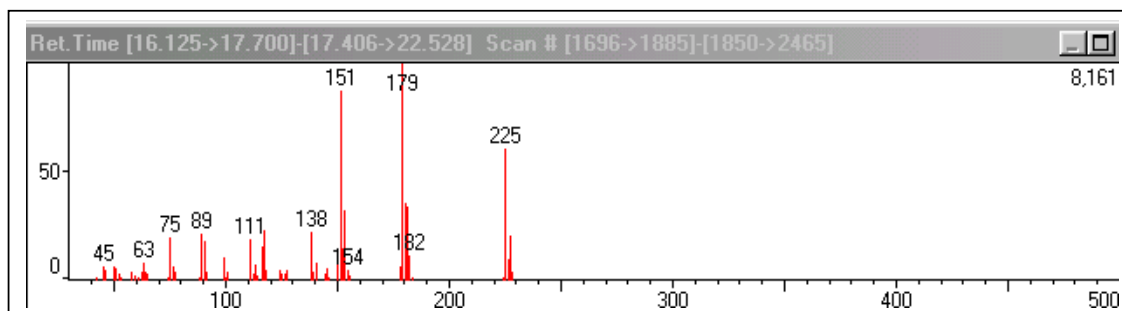

**Figure S2.** GC-MS spectrum for **5c** (R = Cl).

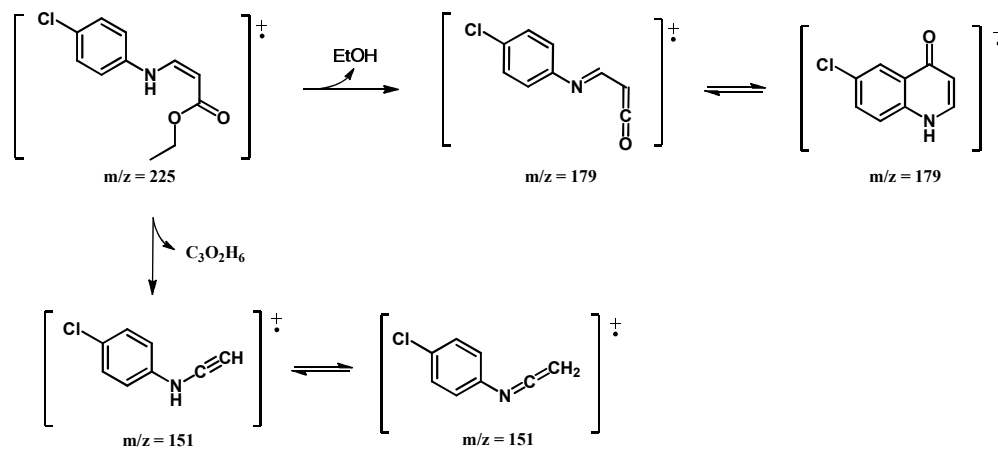

**Ethyl 3-((4-chlorophenyl)amino)acrylate (**5c**).** m/z (%): 225 (62, M<sup>+</sup>); 179 (100); 151 (88).

### 6-chloroquinolin-4(1H)-one (6c)

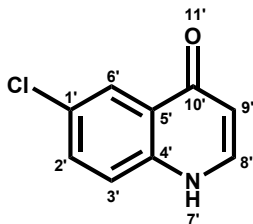

$^1\text{H}$  NMR spectrum in DMSO (400 MHz)

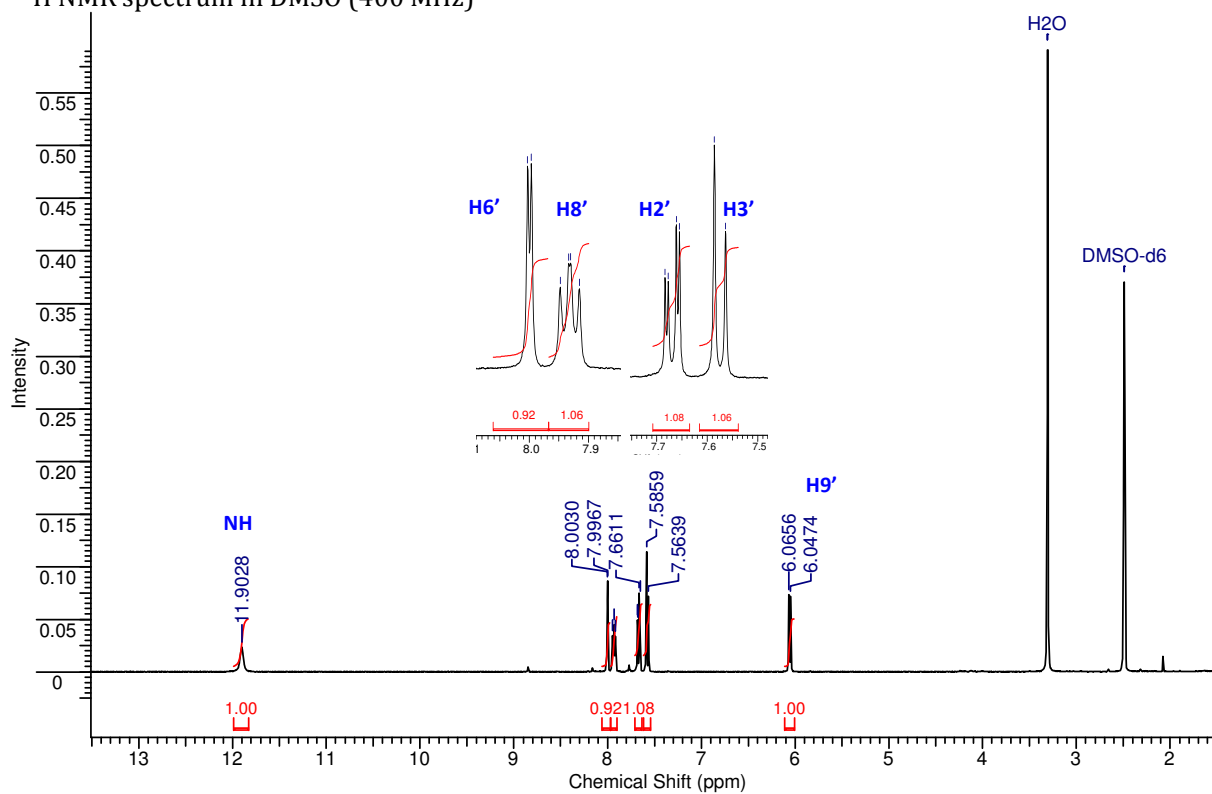

$\delta$  (ppm) : 6.06 (d, 1H,  $J$ = 7.28 Hz); 7.57 (d, 1H,  $J$ = 8.80 Hz); 7.67 (dd, 1H,  $J$ = 9.04 Hz and  $J$ = 2.48 Hz); 7.93 (t, 1H,  $J$ = 7.04 Hz); 8.00 (d, 1H,  $J$ = 2.52 Hz); 11.90 (s, 1H).

$^1\text{H}$  NMR spectrum in DMSO (400 MHz) of soluble products from FVP of **3a**.

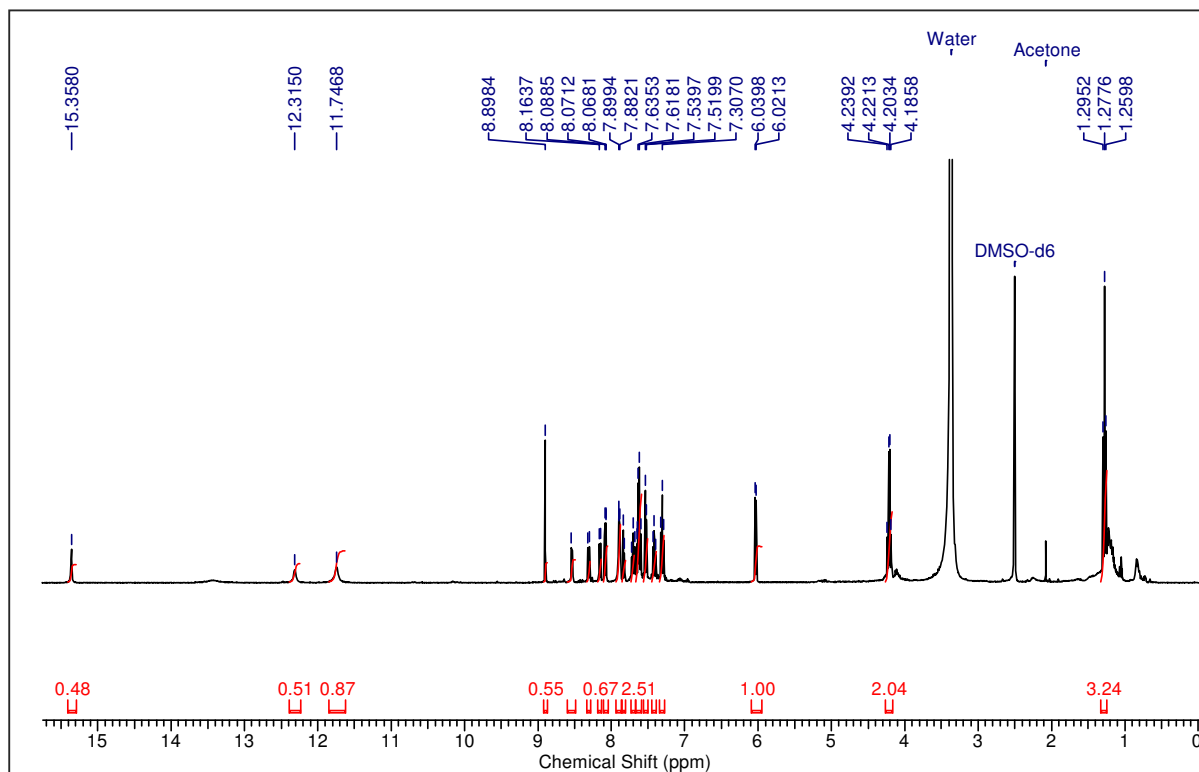

$^1\text{H}$  NMR spectrum in DMSO (400 MHz) of soluble products from FVP of **3b**.

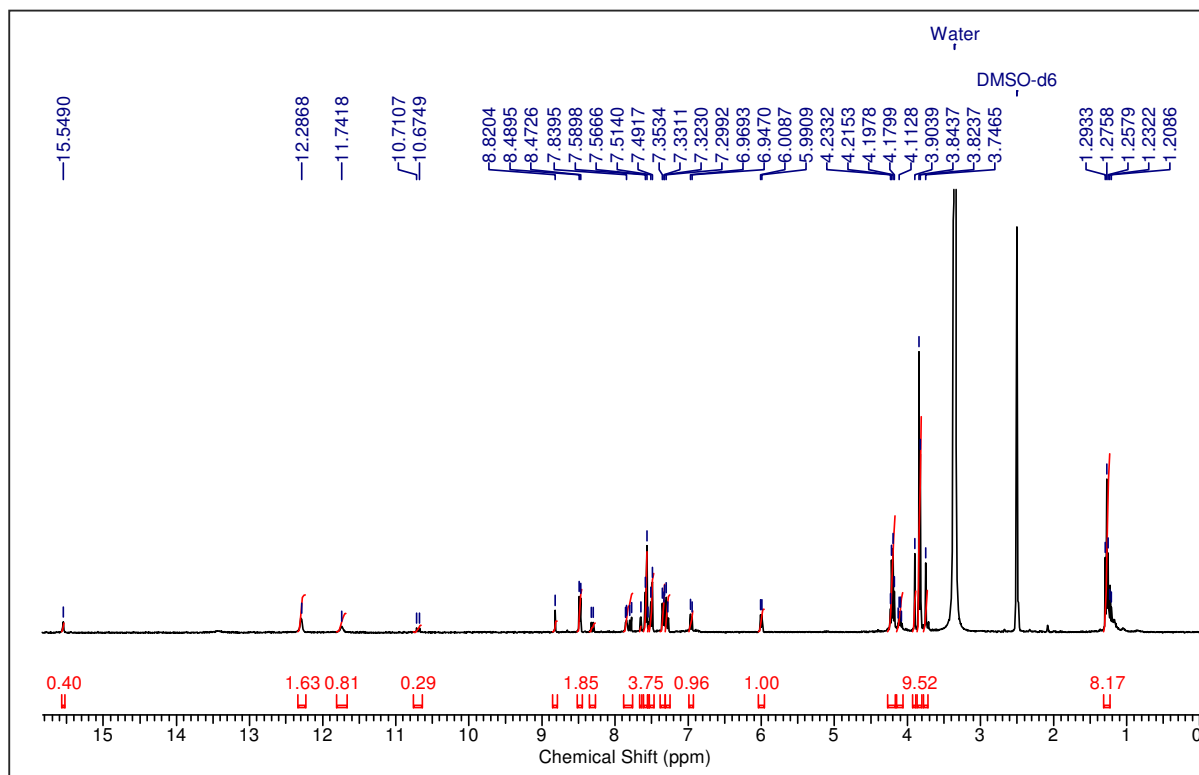

$^1\text{H}$  NMR spectrum in DMSO (400 MHz) of soluble products from FVP of **3e**.

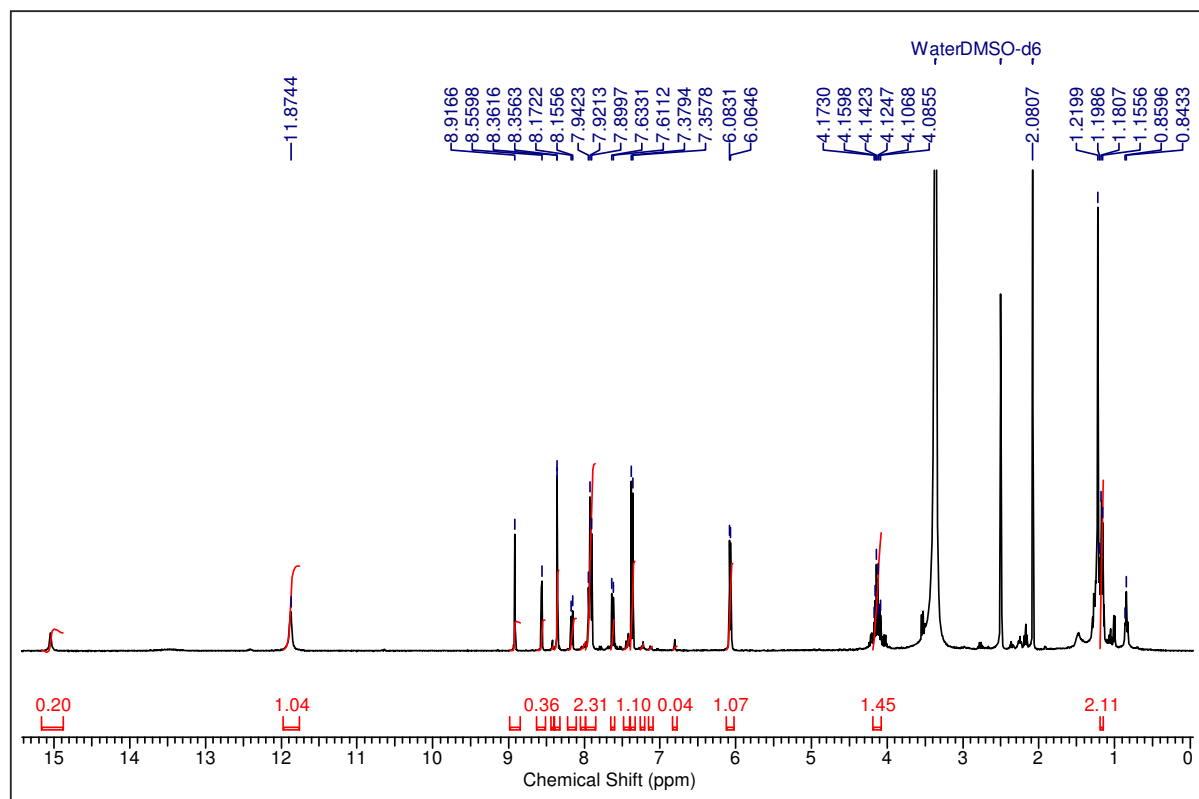

**PART II. COMPUTATIONAL MECHANISM STUDY**

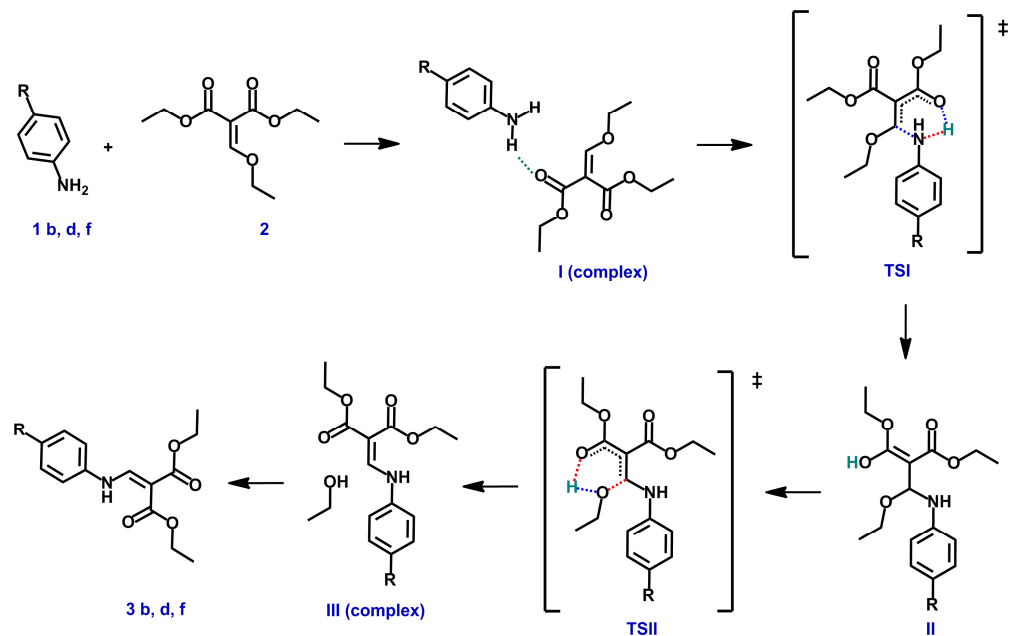

**Scheme S3.** First step of the G-J reaction mechanism.

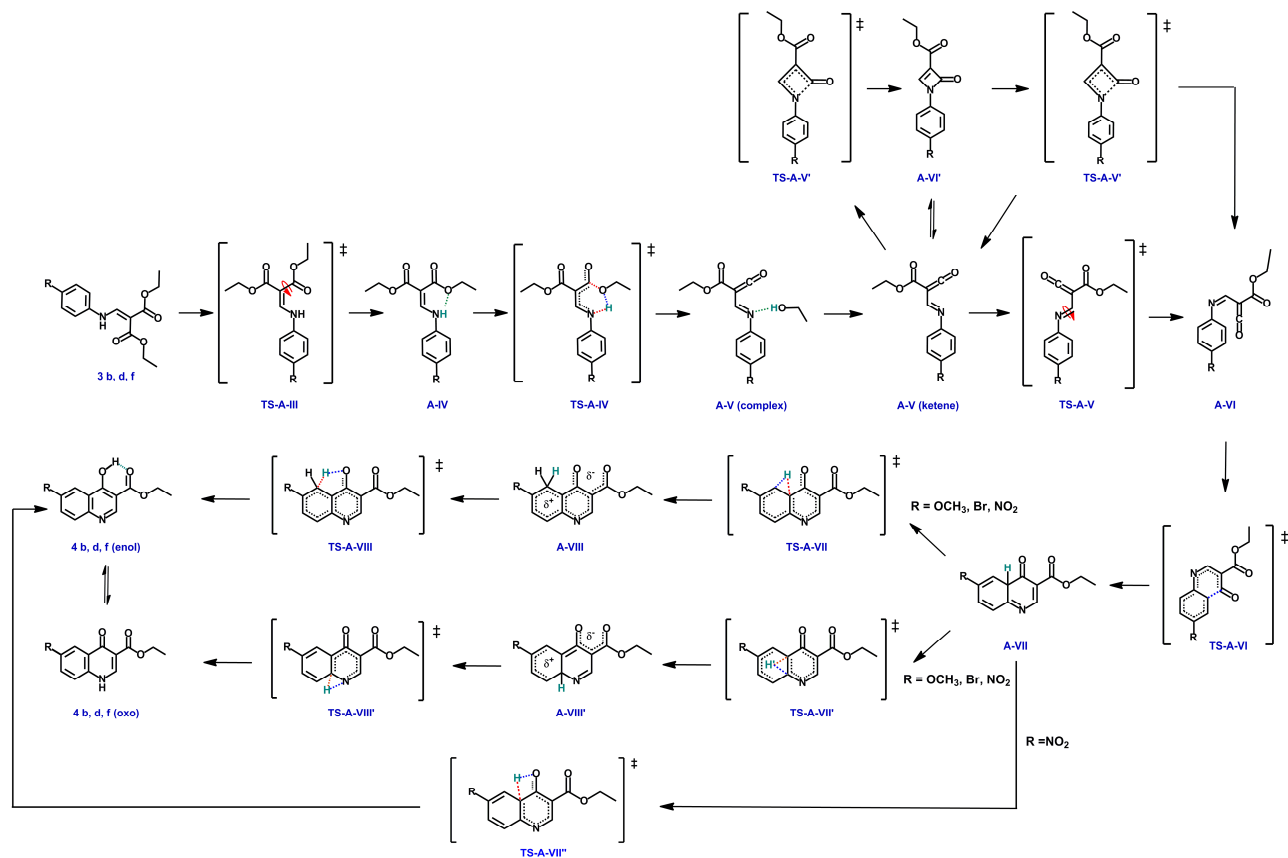

**Scheme S4.** Main reaction (**Path A**) leading to the formation of quinolone 4.



**Table S1.** Thermochemistry calculations details. Example (for R=Br) of data source for main text tables. CAM-B3LYP/6-311+G(d,p) level of theory and CCSD(T) energy refinement.

|                                                                           | CAM-B3LYP      |                      |                |                | CCSD(T)<br>G <sup>d,e</sup> |
|---------------------------------------------------------------------------|----------------|----------------------|----------------|----------------|-----------------------------|
|                                                                           | E <sup>a</sup> | E + ZPE <sup>b</sup> | H <sup>c</sup> | G <sup>d</sup> |                             |
| <b>Path A</b>                                                             |                |                      |                |                |                             |
| 3d                                                                        | -3472.8721     | -3472.5863           | -3472.5648     | -3472.6406     | -3469.0116                  |
| A-IV                                                                      | -3472.8638     | -3472.5780           | -3472.5565     | -3472.6319     | -3468.9654                  |
| TS-A-IV                                                                   | -3472.8105     | -3472.5285           | -3472.5065     | -3472.5835     |                             |
| A-V (+ EtOH)                                                              | -3472.8058     | -3472.5260           | -3472.5032     | -3472.5993     | -3468.9714                  |
| TS-A-V                                                                    | -3317.7554     | -3317.5578           | -3317.5404     | -3317.6060     | -3314.3058                  |
| A-VI                                                                      | -3317.7835     | -3317.5835           | -3317.5664     | -3317.6310     | -3314.3408                  |
| TS-A-VI                                                                   | -3317.7526     | -3317.5536           | -3317.5374     | -3317.5987     | -3314.3074                  |
| A-VII                                                                     | -3317.7716     | -3317.5708           | -3317.5545     | -3317.6162     | -3314.3278                  |
| TS-A-VII                                                                  | -3317.7268     | -3317.5299           | -3317.5139     | -3317.5751     | -3314.2801                  |
| A-VIII                                                                    | -3317.7481     | -3317.5486           | -3317.5321     | -3317.5943     | -3314.2970                  |
| TS-A-VIII                                                                 | -3317.7327     | -3317.5361           | -3317.5204     | -3317.5803     | -3314.2841                  |
| 4d (keto)                                                                 | -3317.8541     | -3317.6507           | -3317.6350     | -3317.6948     | -3314.3972                  |
| 4d (enol)                                                                 | -3317.8390     | -3317.6361           | -3317.6199     | -3317.6817     | -3314.3832                  |
| TS-A-V'                                                                   | -3317.7606     | -3317.5625           | -3317.5455     | -3317.6102     | -3314.3134                  |
| A-VI'                                                                     | -3317.7663     | -3317.5667           | -3317.5496     | -3317.6141     | -3314.3195                  |
| TS-A-VII'                                                                 | -3317.7192     | -3317.5221           | -3317.5060     | -3317.5678     |                             |
| A-VIII'                                                                   | -3317.7206     | -3317.5219           | -3317.5056     | -3317.5674     |                             |
| TS-A-VIII'                                                                | -3317.7113     | -3317.5145           | -3317.4984     | -3317.5596     |                             |
| <b>Path B</b>                                                             |                |                      |                |                |                             |
| B-II                                                                      | -3472.8721     | -3472.5856           | -3472.5645     | -3472.6395     |                             |
| B-II'                                                                     | -3472.8669     | -3472.5809           | -3472.5595     | -3472.6345     |                             |
| TS-B-II                                                                   | -3472.7640     | -3472.4866           | -3472.4651     | -3472.5411     | -3468.9050                  |
| B-III (hereafter + ethene)                                                | -3472.8467     | -3472.5653           | -3472.5432     | -3472.6350     | -3469.0040                  |
| TS-B-III                                                                  | -3472.8179     | -3472.5380           | -3472.5161     | -3472.6075     |                             |
| TS-B-III'                                                                 | -3472.7616     | -3472.4842           | -3472.4626     | -3472.5381     |                             |
| B-IV                                                                      | -3472.8460     | -3472.5645           | -3472.5425     | -3472.6339     |                             |
| B-IV'                                                                     | -3472.7577     | -3472.4816           | -3472.4572     | -3472.5567     |                             |
| TS-B-IV                                                                   | -3472.7606     | -3472.4833           | -3472.4604     | -3472.5549     | -3468.9289                  |
| TS-B-IV'                                                                  | -3472.7558     | -3472.4795           | -3472.4563     | -3472.5516     |                             |
| B-V (complex)                                                             | -3472.7688     | -3472.4920           | -3472.4675     | -3472.5676     |                             |
| B-V (hereafter + CO <sub>2</sub> + ethene)                                | -3472.7634     | -3472.4892           | -3472.4649     | -3472.5738     |                             |
| TS-B-V                                                                    | -3472.7227     | -3472.4521           | -3472.4286     | -3472.5353     | -3468.8666                  |
| 5d                                                                        | -3472.8443     | -3472.5685           | -3472.5459     | -3472.6491     | -3468.9939                  |
| TS-B-VI                                                                   | -3472.7862     | -3472.5150           | -3472.4907     | -3472.5997     |                             |
| B-VI (hereafter + CO <sub>2</sub> + C <sub>2</sub> H <sub>2</sub> + EtOH) | -3472.7793     | -3472.5101           | -3472.4853     | -3472.6123     | -3468.9939                  |
| TS-B-VI'                                                                  | -3472.7565     | -3472.4816           | -3472.4572     | -3472.5572     |                             |
| B-VI' (complex)                                                           | -3472.7775     | -3472.5030           | -3472.4768     | -3472.5829     |                             |
| TS-B-VII                                                                  | -3472.7460     | -3472.4785           | -3472.4539     | -3472.5808     | -3468.9545                  |
| B-VII                                                                     | -3472.7751     | -3472.5057           | -3472.4810     | -3472.6075     | -3468.9903                  |
| TS-B-VIII                                                                 | -3472.7446     | -3472.4755           | -3472.4521     | -3472.5749     | -3468.9569                  |
| B-VIII                                                                    | -3472.7702     | -3472.4989           | -3472.4754     | -3472.5983     | -3468.9826                  |
| TS-B-IX                                                                   | -3472.7234     | -3472.4560           | -3472.4328     | -3472.5549     | -3468.9312                  |
| B-IX                                                                      | -3472.7457     | -3472.4756           | -3472.4520     | -3472.5751     | -3468.9504                  |
| TS-B-X                                                                    | -3472.7277     | -3472.4606           | -3472.4377     | -3472.5590     | -3468.9356                  |
| 6d                                                                        | -3472.8318     | -3472.5588           | -3472.5354     | -3472.6576     | -3469.0351                  |

a) Total electronic energy in Hartrees; b) E plus zero point energy; c) Sum of the electronic and thermal enthalpies; d) Sum of the electronic and thermal free energies; e) From frequencies at CAM-B3LYP level of theory.

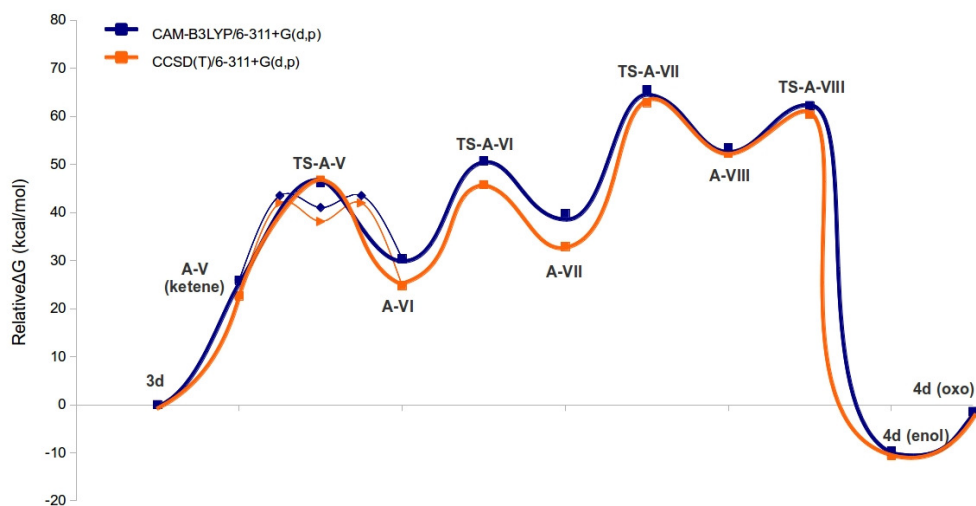

**Figure S3.** Comparison of energy profiles at CAM-B3LYP/6-311+G(d,p) and CCSD(T)/6-311+G(d,p) level of theory for Step 2 (**Path A**)

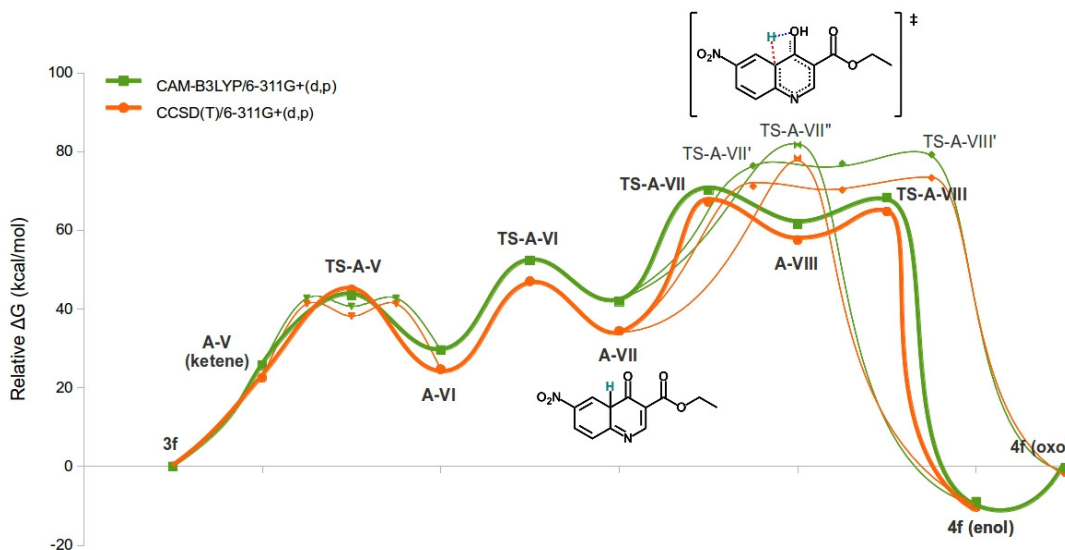

**Figure S4.** Thermochemistry of Step 2 (**Path A**) for R=NO<sub>2</sub> studied at the CAM-B3LYP/6-311+G(d,p) and CCSD(T)/6-311+G(d,p) level of theory.

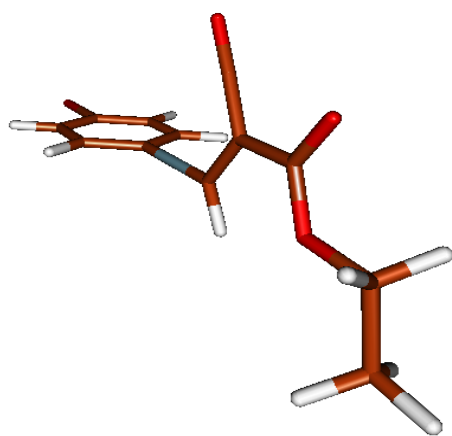

**Figure S5.** 3D view of **TS-A-V** for R=Br.

## X,Y,Z coordinates of main stationary points

### Step 1 (R = Br)

#### 1 (bromoaniline)

|    |           |           |           |
|----|-----------|-----------|-----------|
| C  | -0.000125 | 0.000678  | 0.000000  |
| C  | 0.003239  | 0.000246  | 1.400936  |
| C  | 1.198722  | 0.000119  | 2.105517  |
| C  | 2.409102  | 0.000721  | 1.425086  |
| C  | 2.422496  | 0.001417  | 0.036629  |
| C  | 1.229255  | 0.001250  | -0.671750 |
| N  | -1.185914 | 0.000732  | -0.701404 |
| H  | -0.938342 | -0.000177 | 1.943452  |
| H  | 1.184440  | -0.000454 | 3.190192  |
| Br | 4.037228  | 0.000213  | 2.388150  |
| H  | 3.366213  | 0.001738  | -0.498277 |
| H  | 1.251242  | 0.001629  | -1.758219 |
| H  | -2.072418 | 0.000194  | -0.225752 |
| H  | -1.196017 | 0.001004  | -1.707402 |

## 2 (diethyl-ethoxymethylenmalonate)

|   |           |           |           |
|---|-----------|-----------|-----------|
| C | 0.272782  | 0.437920  | 0.407139  |
| C | -0.171789 | 0.022066  | 1.795524  |
| H | 1.355256  | 0.596202  | 0.376545  |
| H | -0.217897 | 1.376480  | 0.127927  |
| H | 0.001826  | -0.320699 | -0.331799 |
| O | 0.528760  | -1.156315 | 2.240076  |
| H | -1.244611 | -0.177510 | 1.829445  |
| H | 0.080340  | 0.778240  | 2.540858  |
| C | -0.002482 | -2.341528 | 1.925846  |
| C | 0.707194  | -3.462281 | 2.608986  |
| O | -0.953257 | -2.479719 | 1.185012  |
| C | 0.676962  | -3.397513 | 4.087912  |
| O | 1.446188  | -4.330300 | 4.683559  |
| C | 1.394210  | -4.366966 | 6.121465  |
| C | 2.306822  | -5.481769 | 6.580404  |
| H | 0.357725  | -4.529178 | 6.429972  |
| H | 1.709267  | -3.393163 | 6.505617  |
| H | 1.978259  | -6.447188 | 6.184087  |
| H | 2.298503  | -5.539076 | 7.673563  |
| H | 3.335726  | -5.305178 | 6.253352  |
| O | 0.010858  | -2.600936 | 4.714252  |
| C | 1.245588  | -4.551185 | 2.015339  |
| O | 1.431643  | -4.861455 | 0.738971  |
| C | 1.196613  | -3.924569 | -0.326651 |
| C | 1.807686  | -4.512139 | -1.578323 |
| H | 1.670065  | -2.972927 | -0.059009 |
| H | 0.121957  | -3.764523 | -0.428143 |
| H | 2.883929  | -4.664376 | -1.456939 |
| H | 1.645274  | -3.832338 | -2.420736 |
| H | 1.345295  | -5.473632 | -1.818916 |
| H | 1.636078  | -5.340000 | 2.648580  |

## I (complex)

|    |           |           |           |
|----|-----------|-----------|-----------|
| C  | 0.026993  | 0.019492  | -0.017911 |
| C  | 0.004785  | 0.012926  | 1.369306  |
| C  | 1.197290  | 0.006562  | 2.105724  |
| C  | 2.411851  | 0.007090  | 1.408007  |
| C  | 2.434033  | 0.013459  | 0.019818  |
| C  | 1.241968  | 0.019510  | -0.691579 |
| N  | 1.166553  | -0.052160 | 3.490684  |
| Br | 1.270582  | 0.030554  | -2.585927 |
| O  | -1.301018 | 0.816125  | 5.094524  |
| C  | -1.508750 | 0.178367  | 6.113020  |
| C  | -0.578240 | -0.857594 | 6.637556  |
| C  | -1.157937 | -2.215967 | 6.756766  |
| O  | -0.333353 | -3.095490 | 7.352598  |
| C  | -0.799921 | -4.457617 | 7.415162  |
| C  | 0.274033  | -5.274167 | 8.097232  |
| O  | -2.595579 | 0.322091  | 6.862182  |
| C  | -3.654606 | 1.163941  | 6.356395  |
| C  | -3.452598 | 2.608525  | 6.767108  |
| C  | 0.749186  | -0.689985 | 6.826141  |
| O  | 1.499699  | 0.407146  | 6.808238  |
| C  | 0.935408  | 1.729906  | 6.882962  |
| C  | 2.032105  | 2.659194  | 7.351094  |
| O  | -2.256140 | -2.516277 | 6.340346  |
| H  | -3.373257 | 2.696612  | 7.854932  |
| H  | -4.308542 | 3.206861  | 6.437741  |
| H  | -2.551602 | 3.023428  | 6.307736  |
| H  | -3.695099 | 1.055461  | 5.271054  |
| H  | -4.558516 | 0.741950  | 6.797864  |
| H  | -0.998389 | -4.804269 | 6.397454  |
| H  | -1.743602 | -4.474927 | 7.966537  |
| H  | 1.210651  | -5.241560 | 7.532853  |
| H  | -0.046826 | -6.318271 | 8.168342  |
| H  | 0.464847  | -4.903746 | 9.108713  |
| H  | 0.099097  | 1.706621  | 7.590821  |
| H  | 0.553148  | 2.013028  | 5.900430  |
| H  | 2.398290  | 2.369352  | 8.339859  |
| H  | 1.647065  | 3.682198  | 7.408064  |
| H  | 2.873269  | 2.649047  | 6.652141  |
| H  | 1.357304  | -1.559745 | 7.048135  |
| H  | 3.348619  | -0.005171 | 1.959338  |
| H  | 3.382435  | 0.013689  | -0.506847 |
| H  | -0.904169 | 0.024721  | -0.574419 |
| H  | -0.945828 | 0.008580  | 1.895124  |
| H  | 2.002661  | 0.247700  | 3.972798  |
| H  | 0.310470  | 0.253561  | 3.944575  |

**TSI**

|    |           |           |           |
|----|-----------|-----------|-----------|
| C  | -0.008939 | -0.004776 | -0.047754 |
| C  | -0.030392 | 0.088091  | 1.337498  |
| C  | 1.170687  | 0.130527  | 2.035758  |
| C  | 2.377303  | 0.077398  | 1.348112  |
| C  | 2.390084  | -0.011988 | -0.038607 |
| C  | 1.193823  | -0.055104 | -0.742209 |
| N  | 3.623990  | 0.135731  | 2.068779  |
| C  | 4.245464  | -1.198863 | 2.521254  |
| C  | 5.643709  | -0.899436 | 2.975641  |
| C  | 6.378277  | 0.061141  | 2.270798  |
| O  | 7.656035  | 0.259706  | 2.562635  |
| C  | 8.377446  | 1.288733  | 1.863661  |
| C  | 8.938922  | 0.777376  | 0.551167  |
| Br | -1.635956 | -0.073627 | -1.002905 |
| O  | 4.060406  | -2.131518 | 1.494994  |
| C  | 5.087699  | -2.326682 | 0.522873  |
| C  | 4.625333  | -3.438979 | -0.394342 |
| C  | 6.202049  | -1.656410 | 4.080284  |
| O  | 7.315427  | -1.566858 | 4.561880  |
| O  | 5.290953  | -2.550753 | 4.579660  |
| C  | 5.741680  | -3.354767 | 5.675051  |
| C  | 4.602166  | -4.270301 | 6.067737  |
| O  | 5.848260  | 0.783396  | 1.338023  |
| H  | 9.561080  | -0.107005 | 0.717841  |
| H  | 9.558841  | 1.552136  | 0.086645  |
| H  | 8.133950  | 0.520179  | -0.142053 |
| H  | 7.725114  | 2.150454  | 1.710495  |
| H  | 9.176880  | 1.558337  | 2.556334  |
| H  | 6.042520  | -2.701081 | 6.499306  |
| H  | 6.626452  | -3.917568 | 5.363248  |
| H  | 3.726217  | -3.694216 | 6.382133  |
| H  | 4.908554  | -4.910446 | 6.901703  |
| H  | 4.309495  | -4.911342 | 5.230694  |
| H  | 6.021919  | -2.594324 | 1.026405  |
| H  | 5.265148  | -1.401895 | -0.040451 |
| H  | 4.455687  | -4.357945 | 0.174089  |
| H  | 5.385164  | -3.637284 | -1.157446 |
| H  | 3.690619  | -3.170155 | -0.895831 |
| H  | 3.636583  | -1.568408 | 3.344834  |
| H  | 3.335457  | -0.042563 | -0.569760 |
| H  | 1.196679  | -0.125281 | -1.823963 |
| H  | -0.974850 | 0.126774  | 1.868210  |
| H  | 1.161047  | 0.198597  | 3.120397  |
| H  | 4.615125  | 0.607315  | 1.515392  |
| H  | 3.512568  | 0.692844  | 2.917164  |

## II

|    |           |           |           |
|----|-----------|-----------|-----------|
| C  | -0.043460 | 0.062369  | 0.018161  |
| C  | -0.048974 | 0.071047  | 1.407989  |
| C  | 1.155507  | 0.045825  | 2.094145  |
| C  | 2.373570  | 0.003472  | 1.407488  |
| C  | 2.363184  | -0.002626 | 0.012516  |
| C  | 1.154178  | 0.027410  | -0.678104 |
| N  | 3.563562  | -0.025245 | 2.191255  |
| C  | 4.866588  | -0.354042 | 1.566203  |
| C  | 5.926353  | -0.468292 | 2.643048  |
| C  | 5.943048  | 0.394277  | 3.715674  |
| O  | 6.906331  | 0.382863  | 4.613928  |
| C  | 6.870420  | 1.281464  | 5.740947  |
| C  | 7.448323  | 2.637538  | 5.388250  |
| Br | -1.682942 | 0.094169  | -0.928266 |
| O  | 5.168577  | 0.559089  | 0.531000  |
| C  | 5.455750  | 1.911316  | 0.860755  |
| C  | 5.814221  | 2.627922  | -0.424772 |
| C  | 6.994528  | -1.457700 | 2.474898  |
| O  | 7.954573  | -1.631322 | 3.198468  |
| O  | 6.797742  | -2.220942 | 1.366441  |
| C  | 7.799439  | -3.212594 | 1.101375  |
| C  | 7.407458  | -3.924558 | -0.174705 |
| O  | 4.992809  | 1.304281  | 3.939704  |
| H  | 8.459885  | 2.530189  | 4.986318  |
| H  | 7.499762  | 3.259112  | 6.288673  |
| H  | 6.826202  | 3.153052  | 4.652152  |
| H  | 5.847931  | 1.360063  | 6.114572  |
| H  | 7.485064  | 0.772415  | 6.484838  |
| H  | 7.854660  | -3.897351 | 1.952648  |
| H  | 8.770581  | -2.717505 | 1.011974  |
| H  | 6.434193  | -4.413423 | -0.068580 |
| H  | 8.151536  | -4.690649 | -0.416165 |
| H  | 7.351103  | -3.222822 | -1.012142 |
| H  | 6.291456  | 1.953920  | 1.569382  |
| H  | 4.580482  | 2.381626  | 1.328679  |
| H  | 6.684285  | 2.159767  | -0.894156 |
| H  | 6.051455  | 3.676773  | -0.218718 |
| H  | 4.981071  | 2.595694  | -1.133085 |
| H  | 4.796605  | -1.305350 | 1.037912  |
| H  | 3.295122  | -0.017273 | -0.536723 |
| H  | 1.154419  | 0.019939  | -1.762539 |
| H  | -0.986782 | 0.099512  | 1.951653  |
| H  | 1.152331  | 0.063550  | 3.181177  |
| H  | 4.251397  | 1.141665  | 3.288593  |
| H  | 3.429302  | -0.666173 | 2.971107  |



**TSII**

|    |           |           |           |
|----|-----------|-----------|-----------|
| C  | -0.062584 | -0.619227 | -0.002814 |
| C  | -0.022809 | -0.742439 | 1.381457  |
| C  | 1.175661  | -0.569792 | 2.057391  |
| C  | 2.340177  | -0.274499 | 1.358609  |
| C  | 2.303051  | -0.168042 | -0.023195 |
| C  | 1.103554  | -0.345161 | -0.719794 |
| Br | 1.224570  | -0.738212 | 3.941794  |
| N  | 1.118994  | -0.258887 | -2.115677 |
| C  | 0.072490  | -0.553772 | -2.952563 |
| C  | 0.347092  | -0.580917 | -4.395750 |
| C  | 0.643701  | 0.658331  | -5.004077 |
| O  | 1.108336  | 0.662711  | -6.247726 |
| C  | 1.253328  | 1.926066  | -6.920175 |
| C  | -0.052053 | 2.363272  | -7.556016 |
| C  | 0.216624  | -1.827120 | -5.119571 |
| O  | 0.386420  | -2.023315 | -6.307385 |
| O  | -0.153213 | -2.850096 | -4.280580 |
| C  | -0.311597 | -4.134715 | -4.894666 |
| C  | -0.699363 | -5.114906 | -3.808689 |
| O  | 0.457370  | 1.762223  | -4.395399 |
| O  | -1.002147 | 0.777172  | -2.705516 |
| C  | -2.329842 | 0.597607  | -3.233160 |
| C  | -3.103218 | 1.895367  | -3.122180 |
| H  | -0.431638 | 1.587003  | -8.226632 |
| H  | 0.107019  | 3.277585  | -8.138122 |
| H  | -0.806683 | 2.572668  | -6.792903 |
| H  | 1.626199  | 2.670926  | -6.215084 |
| H  | 2.013982  | 1.730254  | -7.677971 |
| H  | 0.628329  | -4.414622 | -5.378864 |
| H  | -1.075842 | -4.067125 | -5.674690 |
| H  | 0.072207  | -5.166991 | -3.034537 |
| H  | -0.824733 | -6.114920 | -4.236684 |
| H  | -1.642948 | -4.824878 | -3.335710 |
| H  | -2.791649 | -0.195716 | -2.638041 |
| H  | -2.253347 | 0.255502  | -4.270834 |
| H  | -3.165270 | 2.225705  | -2.081560 |
| H  | -4.119804 | 1.753385  | -3.502942 |
| H  | -2.628078 | 2.685756  | -3.711194 |
| H  | -0.562890 | -1.354071 | -2.585668 |
| H  | -1.012814 | -0.717708 | -0.513034 |
| H  | -0.931965 | -0.960393 | 1.930653  |
| H  | 3.275684  | -0.137494 | 1.889427  |
| H  | 3.217384  | 0.045358  | -0.570299 |
| H  | -0.436844 | 1.423961  | -3.345091 |
| H  | 1.929518  | 0.165067  | -2.546422 |

### III (complex)

|    |           |           |           |
|----|-----------|-----------|-----------|
| C  | -0.005876 | -0.051854 | -0.031105 |
| C  | -0.017729 | -0.055418 | 1.358725  |
| C  | 1.179280  | -0.009783 | 2.060768  |
| C  | 2.394420  | 0.037100  | 1.388964  |
| C  | 2.408227  | 0.022385  | 0.001114  |
| C  | 1.211155  | -0.034155 | -0.713195 |
| Br | 1.157301  | -0.025165 | 3.952234  |
| N  | 1.267495  | -0.027666 | -2.122106 |
| C  | 0.362571  | -0.582497 | -2.934736 |
| C  | 0.359118  | -0.516319 | -4.311038 |
| C  | 1.423048  | 0.213496  | -4.998878 |
| O  | 1.384295  | 0.153799  | -6.328123 |
| C  | 2.414962  | 0.846413  | -7.056164 |
| C  | 2.069823  | 2.311556  | -7.239084 |
| C  | -0.740049 | -1.180154 | -5.037327 |
| O  | -1.130251 | -0.917037 | -6.154015 |
| O  | -1.323207 | -2.152527 | -4.288630 |
| C  | -2.440532 | -2.825346 | -4.889269 |
| C  | -2.870651 | -3.927163 | -3.946245 |
| O  | 2.317650  | 0.812064  | -4.397133 |
| O  | -2.300844 | 1.001724  | -2.254903 |
| C  | -3.474904 | 0.811241  | -3.046127 |
| C  | -4.361593 | -0.183651 | -2.329106 |
| H  | 1.096215  | 2.419346  | -7.726074 |
| H  | 2.826002  | 2.793077  | -7.868572 |
| H  | 2.046052  | 2.829145  | -6.276750 |
| H  | 3.366014  | 0.721121  | -6.534500 |
| H  | 2.452729  | 0.324793  | -8.013982 |
| H  | -2.132949 | -3.216825 | -5.862343 |
| H  | -3.240355 | -2.098478 | -5.062935 |
| H  | -2.057261 | -4.640311 | -3.783434 |
| H  | -3.722386 | -4.467574 | -4.371743 |
| H  | -3.172772 | -3.522281 | -2.975680 |
| H  | -3.200825 | 0.438081  | -4.041626 |
| H  | -3.999743 | 1.767406  | -3.173365 |
| H  | -3.843870 | -1.139916 | -2.205807 |
| H  | -5.279641 | -0.357982 | -2.899639 |
| H  | -4.635495 | 0.190405  | -1.337952 |
| H  | -0.435684 | -1.129855 | -2.449604 |
| H  | -0.942614 | -0.017399 | -0.578893 |
| H  | -0.962106 | -0.070124 | 1.891276  |
| H  | 3.325147  | 0.074668  | 1.943743  |
| H  | 3.354191  | 0.041460  | -0.532263 |
| H  | -1.717341 | 1.633138  | -2.699597 |

**3d (diethyl 2-((4-bromophenyl)amino)methylene)malonate)**

|    |           |           |           |
|----|-----------|-----------|-----------|
| C  | 0.106828  | -0.759347 | 0.267698  |
| C  | 0.051556  | -0.071466 | 1.472028  |
| C  | 1.171602  | 0.595076  | 1.951862  |
| C  | 2.349474  | 0.569709  | 1.219939  |
| C  | 2.419680  | -0.118534 | 0.006233  |
| C  | 1.286729  | -0.783564 | -0.465501 |
| Br | -1.557973 | -0.043740 | 2.464972  |
| N  | 3.644356  | -0.095824 | -0.680593 |
| C  | 3.935663  | -0.707458 | -1.833872 |
| C  | 5.144100  | -0.665367 | -2.493051 |
| C  | 5.278441  | -1.417171 | -3.757640 |
| O  | 4.120793  | -2.049196 | -4.094368 |
| C  | 4.154957  | -2.813293 | -5.310127 |
| C  | 2.790516  | -3.440492 | -5.491973 |
| C  | 6.243369  | 0.117615  | -1.918510 |
| O  | 6.131103  | 0.732911  | -0.855450 |
| O  | 7.372552  | 0.121151  | -2.616848 |
| C  | 8.478440  | 0.880825  | -2.092929 |
| C  | 8.387651  | 2.337857  | -2.502312 |
| O  | 6.266749  | -1.499954 | -4.450729 |
| H  | 8.324241  | 2.429005  | -3.590624 |
| H  | 9.281851  | 2.872189  | -2.163515 |
| H  | 7.512949  | 2.815498  | -2.053698 |
| H  | 8.503832  | 0.770254  | -1.007055 |
| H  | 9.354287  | 0.398418  | -2.529916 |
| H  | 4.944467  | -3.565641 | -5.230973 |
| H  | 4.412791  | -2.146540 | -6.137605 |
| H  | 2.547756  | -4.102084 | -4.654829 |
| H  | 2.775318  | -4.033678 | -6.411948 |
| H  | 2.012564  | -2.674530 | -5.566600 |
| H  | 3.145285  | -1.291377 | -2.285758 |
| H  | 1.302183  | -1.323518 | -1.405061 |
| H  | -0.769663 | -1.277704 | -0.104698 |
| H  | 1.127712  | 1.131871  | 2.892824  |
| H  | 3.226890  | 1.089705  | 1.593833  |
| H  | 4.421930  | 0.437962  | -0.284585 |

**EtOH**

|   |           |           |           |
|---|-----------|-----------|-----------|
| C | -0.005212 | -0.001510 | -0.016497 |
| C | 0.013313  | -0.018628 | 1.503319  |
| O | 1.330709  | 0.010670  | 2.038000  |
| H | -1.034897 | 0.027467  | -0.390387 |
| H | 0.472759  | -0.898406 | -0.428967 |
| H | 0.528236  | 0.874971  | -0.396513 |
| H | -0.534767 | -0.891831 | 1.885314  |
| H | -0.473752 | 0.874647  | 1.902287  |
| H | 1.807458  | -0.779500 | 1.746896  |

## Step 2 - Pathway A (R = Br)

### TS-A-III

|    |           |           |           |
|----|-----------|-----------|-----------|
| C  | 1.091938  | -0.327951 | 0.112431  |
| C  | 1.628566  | 0.947562  | -0.075085 |
| C  | 3.005543  | 1.125690  | -0.125088 |
| C  | 3.855893  | 0.036178  | 0.005628  |
| C  | 3.335421  | -1.237781 | 0.191928  |
| C  | 1.961666  | -1.415723 | 0.246101  |
| Br | 5.728633  | 0.290837  | -0.065427 |
| N  | -0.285189 | -0.580527 | 0.168004  |
| C  | -1.290567 | 0.334545  | 0.107063  |
| C  | -2.609946 | 0.061454  | 0.174030  |
| C  | -3.629582 | 1.111620  | 0.075907  |
| O  | -3.110184 | 2.354082  | 0.004146  |
| C  | -4.062013 | 3.426435  | -0.124303 |
| C  | -3.279942 | 4.718881  | -0.202931 |
| C  | -3.136163 | -1.325659 | 0.369701  |
| O  | -3.530403 | -1.769110 | 1.425348  |
| O  | -3.091336 | -2.037728 | -0.772710 |
| C  | -3.642950 | -3.370328 | -0.736887 |
| C  | -2.606074 | -4.386352 | -0.290424 |
| O  | -4.822725 | 0.889478  | 0.048586  |
| H  | -1.724200 | -4.356888 | -0.941640 |
| H  | -3.030597 | -5.394118 | -0.343566 |
| H  | -2.300550 | -4.205157 | 0.744786  |
| H  | -4.513368 | -3.367483 | -0.077477 |
| H  | -3.966669 | -3.553428 | -1.764132 |
| H  | -4.730731 | 3.403740  | 0.740126  |
| H  | -4.662546 | 3.255541  | -1.020167 |
| H  | -2.678193 | 4.871061  | 0.698496  |
| H  | -3.970767 | 5.563428  | -0.298320 |
| H  | -2.613746 | 4.724294  | -1.068247 |
| H  | -0.987203 | 1.370219  | 0.008110  |
| H  | 0.992182  | 1.813919  | -0.186397 |
| H  | 3.414487  | 2.120666  | -0.272385 |
| H  | 3.998016  | -2.088290 | 0.298502  |
| H  | 1.559044  | -2.414594 | 0.396528  |
| H  | -0.550158 | -1.554305 | 0.241266  |

**A-IV**

|    |           |           |           |
|----|-----------|-----------|-----------|
| C  | 0.014185  | 0.318106  | -0.039456 |
| C  | -0.080305 | 0.337737  | 1.346606  |
| C  | 1.033171  | 0.046631  | 2.122455  |
| C  | 2.244891  | -0.268605 | 1.520885  |
| C  | 2.336293  | -0.297962 | 0.137093  |
| C  | 1.222598  | -0.011188 | -0.655896 |
| Br | 0.895263  | 0.066518  | 4.007476  |
| N  | 1.381892  | -0.036700 | -2.050971 |
| C  | 0.393790  | -0.078228 | -2.963210 |
| C  | 0.498772  | -0.044222 | -4.327309 |
| C  | 1.759292  | 0.133696  | -5.068691 |
| O  | 2.858813  | -0.046239 | -4.267851 |
| C  | 4.146166  | 0.134611  | -4.895942 |
| C  | 4.599784  | -1.127973 | -5.600628 |
| C  | -0.742105 | -0.191363 | -5.122556 |
| O  | -0.802030 | -0.486403 | -6.292644 |
| O  | -1.857511 | 0.017778  | -4.374839 |
| C  | -3.109593 | -0.174740 | -5.054004 |
| C  | -4.214884 | 0.085067  | -4.054694 |
| O  | 1.869984  | 0.432451  | -6.231888 |
| H  | 4.635205  | -1.972487 | -4.905442 |
| H  | 5.604188  | -0.979195 | -6.011477 |
| H  | 3.925768  | -1.374146 | -6.424425 |
| H  | 4.078172  | 0.975380  | -5.588306 |
| H  | 4.814338  | 0.396853  | -4.072478 |
| H  | -3.143449 | -1.194281 | -5.448273 |
| H  | -3.155303 | 0.511943  | -5.903448 |
| H  | -4.156691 | -0.611767 | -3.212830 |
| H  | -5.188576 | -0.044333 | -4.538003 |
| H  | -4.159058 | 1.106049  | -3.665226 |
| H  | -0.606398 | -0.160251 | -2.557292 |
| H  | -0.856813 | 0.585291  | -0.626913 |
| H  | -1.021868 | 0.593954  | 1.819168  |
| H  | 3.113564  | -0.496574 | 2.128276  |
| H  | 3.280942  | -0.555968 | -0.333513 |
| H  | 2.325811  | -0.048358 | -2.423402 |

**TS-A-IV**

|    |           |           |           |
|----|-----------|-----------|-----------|
| C  | -0.205792 | -0.774420 | 0.005670  |
| C  | -0.369917 | -0.366163 | 1.331487  |
| C  | 0.695024  | 0.253440  | 1.990621  |
| C  | 1.915649  | 0.427308  | 1.348277  |
| C  | 2.068327  | -0.010402 | 0.039926  |
| C  | 1.012495  | -0.609232 | -0.638055 |
| N  | -1.636188 | -0.544577 | 1.927206  |
| C  | -1.702509 | -0.927232 | 3.147240  |
| C  | -2.900000 | -1.133022 | 3.938929  |
| C  | -4.205583 | -1.035222 | 3.567548  |
| O  | -4.149768 | 0.230895  | 1.510129  |
| C  | -4.379121 | 1.628542  | 1.623264  |
| C  | -4.400293 | 2.313991  | 0.266616  |
| Br | 3.737616  | 0.197545  | -0.824864 |
| C  | -2.806153 | -1.580327 | 5.348428  |
| O  | -3.760898 | -1.799007 | 6.064282  |
| O  | -1.532545 | -1.713869 | 5.753894  |
| C  | -1.345232 | -2.152773 | 7.116325  |
| C  | 0.143560  | -2.230256 | 7.365040  |
| O  | -5.349667 | -1.110116 | 3.541146  |
| H  | -3.430468 | 2.221992  | -0.234389 |
| H  | -4.625709 | 3.380938  | 0.376805  |
| H  | -5.161540 | 1.861227  | -0.375649 |
| H  | -5.347728 | 1.739115  | 2.120742  |
| H  | -3.618208 | 2.086175  | 2.272520  |
| H  | -1.835931 | -3.121829 | 7.237060  |
| H  | -1.839600 | -1.439065 | 7.780126  |
| H  | 0.619676  | -2.941681 | 6.684033  |
| H  | 0.327005  | -2.562948 | 8.391525  |
| H  | 0.615813  | -1.252429 | 7.232569  |
| H  | -0.792103 | -1.162130 | 3.702787  |
| H  | 0.564596  | 0.626000  | 3.001979  |
| H  | 2.740051  | 0.909325  | 1.862119  |
| H  | 1.141034  | -0.942841 | -1.661837 |
| H  | -1.042702 | -1.234375 | -0.510096 |
| H  | -3.193326 | 0.051563  | 1.345651  |

## A-V (complex)

|    |           |           |           |
|----|-----------|-----------|-----------|
| C  | -0.373321 | 0.574124  | 0.444069  |
| C  | -0.319465 | 0.279109  | 1.798996  |
| C  | 0.907038  | 0.226407  | 2.465263  |
| C  | 2.079288  | 0.518260  | 1.762906  |
| C  | 2.030203  | 0.820712  | 0.406933  |
| C  | 0.804283  | 0.843924  | -0.244193 |
| N  | 0.893694  | -0.041069 | 3.851010  |
| C  | 1.803155  | -0.783150 | 4.356652  |
| C  | 1.889335  | -1.089326 | 5.773565  |
| C  | 2.957354  | -1.892519 | 6.389025  |
| O  | 3.867579  | -2.287985 | 5.488601  |
| C  | 4.954837  | -3.093043 | 5.995807  |
| C  | 5.853999  | -3.425695 | 4.827718  |
| Br | 0.737949  | 1.232252  | -2.093479 |
| C  | 0.935917  | -0.683900 | 6.636733  |
| O  | 0.119612  | -0.387767 | 7.382081  |
| O  | 3.006439  | -2.164400 | 7.571022  |
| O  | 0.149881  | 2.124653  | 5.619657  |
| C  | 0.700218  | 3.344077  | 5.150474  |
| C  | -0.104857 | 3.955539  | 4.013439  |
| H  | -0.113077 | 3.296398  | 3.137797  |
| H  | 0.325221  | 4.916166  | 3.706571  |
| H  | -1.140567 | 4.121492  | 4.325829  |
| H  | 0.710318  | 4.016630  | 6.013134  |
| H  | 1.745805  | 3.198037  | 4.838117  |
| H  | 4.532552  | -3.987023 | 6.461482  |
| H  | 5.474000  | -2.521635 | 6.769275  |
| H  | 5.312220  | -3.988538 | 4.062087  |
| H  | 6.692869  | -4.037591 | 5.173788  |
| H  | 6.258092  | -2.517282 | 4.371593  |
| H  | 2.574025  | -1.260565 | 3.745541  |
| H  | 3.032925  | 0.538466  | 2.281513  |
| H  | 2.940824  | 1.049119  | -0.135831 |
| H  | -1.325573 | 0.600200  | -0.073993 |
| H  | -1.228995 | 0.080287  | 2.356654  |
| H  | 0.220115  | 1.449130  | 4.916712  |



**A-V (ketene)**

|    |           |           |           |
|----|-----------|-----------|-----------|
| C  | -0.146950 | 0.095469  | 0.039635  |
| C  | -0.059369 | -0.027678 | 1.418653  |
| C  | 1.184592  | -0.035371 | 2.055087  |
| C  | 2.341742  | 0.129701  | 1.287994  |
| C  | 2.259244  | 0.264129  | -0.093233 |
| C  | 1.015621  | 0.240495  | -0.709218 |
| N  | 1.204093  | -0.143834 | 3.457204  |
| C  | 2.115049  | -0.830666 | 4.024533  |
| C  | 2.208586  | -0.918875 | 5.477901  |
| C  | 3.174223  | -1.731323 | 6.229917  |
| O  | 3.994563  | -2.407522 | 5.414883  |
| C  | 4.981428  | -3.244582 | 6.056651  |
| C  | 5.786765  | -3.911480 | 4.965607  |
| Br | 0.902035  | 0.398874  | -2.590384 |
| C  | 1.348400  | -0.204410 | 6.221479  |
| O  | 0.609591  | 0.405094  | 6.854907  |
| O  | 3.222402  | -1.782802 | 7.442164  |
| H  | 4.460130  | -3.968386 | 6.688178  |
| H  | 5.599195  | -2.615362 | 6.702394  |
| H  | 5.147686  | -4.527131 | 4.326115  |
| H  | 6.547656  | -4.557564 | 5.414525  |
| H  | 6.292415  | -3.169455 | 4.340907  |
| H  | 2.868076  | -1.404166 | 3.475308  |
| H  | 3.311362  | 0.186371  | 1.773119  |
| H  | 3.158599  | 0.396807  | -0.684538 |
| H  | -1.113668 | 0.086130  | -0.451452 |
| H  | -0.955428 | -0.124966 | 2.022762  |

**TS-A-V**

|    |           |           |           |
|----|-----------|-----------|-----------|
| C  | -0.544382 | -0.222254 | 1.009926  |
| C  | 0.159984  | 0.031353  | 2.179699  |
| C  | 1.529015  | 0.260181  | 2.132454  |
| C  | 2.200085  | 0.236651  | 0.919019  |
| C  | 1.501007  | -0.021078 | -0.274735 |
| C  | 0.113842  | -0.248760 | -0.210474 |
| Br | -0.746609 | 0.058916  | 3.842397  |
| N  | 2.145309  | -0.041736 | -1.455915 |
| C  | 2.738017  | -0.061075 | -2.545747 |
| C  | 3.354661  | -1.253962 | -3.173893 |
| C  | 4.055941  | -1.266280 | -4.467022 |
| O  | 4.079821  | -0.054186 | -5.032949 |
| C  | 4.748279  | 0.039364  | -6.310962 |
| C  | 4.658342  | 1.478150  | -6.763741 |
| C  | 3.288607  | -2.433541 | -2.543483 |
| O  | 3.209453  | -3.426068 | -1.969338 |
| O  | 4.552370  | -2.259338 | -4.958722 |
| H  | 4.257102  | -0.645988 | -7.006221 |
| H  | 5.781923  | -0.291516 | -6.182721 |
| H  | 5.147031  | 2.146442  | -6.048942 |
| H  | 3.616126  | 1.790568  | -6.875763 |
| H  | 5.155754  | 1.588794  | -7.732350 |
| H  | 2.859883  | 0.842476  | -3.160678 |
| H  | -0.436768 | -0.444264 | -1.124473 |
| H  | -1.613914 | -0.400429 | 1.046175  |
| H  | 2.079618  | 0.458971  | 3.045840  |
| H  | 3.268978  | 0.417949  | 0.881785  |

**TS-A-V'**

|    |           |           |           |
|----|-----------|-----------|-----------|
| C  | 0.053636  | -0.000477 | -0.032970 |
| C  | -0.009141 | -0.000156 | 1.355472  |
| C  | 1.153185  | 0.000289  | 2.116276  |
| C  | 2.388968  | 0.000414  | 1.484498  |
| C  | 2.466576  | 0.000092  | 0.089112  |
| C  | 1.288573  | -0.000353 | -0.665581 |
| Br | -1.694263 | -0.000324 | 2.212403  |
| N  | 3.729003  | 0.000231  | -0.495131 |
| C  | 4.140107  | 0.000031  | -1.740716 |
| C  | 5.542332  | 0.000407  | -1.607778 |
| C  | 6.668054  | 0.000439  | -2.514772 |
| O  | 6.248643  | 0.000010  | -3.800248 |
| C  | 7.284712  | 0.000001  | -4.800286 |
| C  | 6.610223  | -0.000490 | -6.153481 |
| C  | 5.522032  | 0.000759  | -0.187902 |
| O  | 6.040102  | 0.001146  | 0.855101  |
| O  | 7.836480  | 0.000799  | -2.186791 |
| H  | 7.911830  | -0.883492 | -4.653181 |
| H  | 7.911424  | 0.883854  | -4.653619 |
| H  | 5.983690  | -0.888550 | -6.279119 |
| H  | 7.367780  | -0.000527 | -6.943626 |
| H  | 5.983304  | 0.887233  | -6.279571 |
| H  | 3.526805  | -0.000331 | -2.637323 |
| H  | 1.328269  | -0.000610 | -1.750262 |
| H  | -0.857784 | -0.000823 | -0.620228 |
| H  | 1.096196  | 0.000539  | 3.198981  |
| H  | 3.303797  | 0.000762  | 2.067803  |

**A-VI**

|    |           |           |           |
|----|-----------|-----------|-----------|
| C  | -0.028727 | 0.035098  | 0.030993  |
| C  | 0.002313  | 0.030413  | 1.420312  |
| C  | 1.212077  | -0.003959 | 2.103305  |
| C  | 2.402614  | -0.043725 | 1.389594  |
| C  | 2.385667  | -0.063434 | -0.008503 |
| C  | 1.161915  | -0.004665 | -0.682540 |
| Br | -1.615042 | 0.133047  | 2.390641  |
| N  | 3.591381  | -0.070728 | -0.730563 |
| C  | 4.112442  | -1.182966 | -1.063325 |
| C  | 3.632508  | -2.547131 | -0.801497 |
| C  | 4.359728  | -3.749165 | -1.259344 |
| O  | 5.478924  | -3.436574 | -1.923488 |
| C  | 6.261289  | -4.547982 | -2.412644 |
| C  | 7.465291  | -3.973307 | -3.122509 |
| C  | 2.506649  | -2.856376 | -0.133271 |
| O  | 1.569553  | -3.227301 | 0.420793  |
| O  | 3.986117  | -4.886361 | -1.056969 |
| H  | 5.632641  | -5.144590 | -3.078466 |
| H  | 6.540982  | -5.173090 | -1.560900 |
| H  | 7.161687  | -3.343756 | -3.963861 |
| H  | 8.085934  | -4.787653 | -3.509288 |
| H  | 8.073551  | -3.372368 | -2.440400 |
| H  | 5.045436  | -1.155860 | -1.621422 |
| H  | 1.152234  | 0.014119  | -1.767836 |
| H  | -0.977760 | 0.078100  | -0.492117 |
| H  | 1.225519  | 0.008748  | 3.187654  |
| H  | 3.354780  | -0.055221 | 1.910711  |

**A-VI'**

|    |           |           |           |
|----|-----------|-----------|-----------|
| C  | -0.020382 | 0.062879  | 0.025502  |
| C  | 0.007733  | -0.014565 | 1.410784  |
| C  | 1.218925  | -0.080820 | 2.088999  |
| C  | 2.412602  | -0.055641 | 1.382078  |
| C  | 2.392795  | 0.014210  | -0.013831 |
| C  | 1.171695  | 0.069728  | -0.687960 |
| Br | -1.615569 | -0.049702 | 2.379572  |
| N  | 3.603909  | 0.070620  | -0.712522 |
| C  | 4.917025  | -0.551675 | -0.454396 |
| O  | 5.420916  | -0.890071 | 0.564961  |
| C  | 3.903391  | -0.036596 | -2.077625 |
| C  | 5.152827  | -0.543485 | -1.941764 |
| C  | 6.270314  | -0.842195 | -2.822094 |
| O  | 5.944835  | -0.622754 | -4.111545 |
| C  | 6.976671  | -0.901392 | -5.078803 |
| C  | 6.417169  | -0.580165 | -6.445876 |
| O  | 7.352549  | -1.242643 | -2.454796 |
| H  | 7.263389  | -1.952530 | -4.987103 |
| H  | 7.852202  | -0.292379 | -4.838376 |
| H  | 5.538300  | -1.193895 | -6.664242 |
| H  | 7.174424  | -0.780702 | -7.210341 |
| H  | 6.130943  | 0.473455  | -6.514678 |
| H  | 3.274351  | 0.257813  | -2.907469 |
| H  | 1.140516  | 0.119162  | -1.771682 |
| H  | -0.967321 | 0.108159  | -0.500554 |
| H  | 1.233978  | -0.144569 | 3.171248  |
| H  | 3.360577  | -0.095227 | 1.905998  |

TS-A-VI

|    |           |           |           |
|----|-----------|-----------|-----------|
| C  | -1.256534 | 0.642176  | 1.135473  |
| C  | 0.066044  | 0.183136  | 2.454175  |
| C  | 1.326614  | 0.396587  | 1.823255  |
| N  | 1.602136  | 1.555008  | 1.179856  |
| C  | 0.615476  | 2.163472  | 0.571339  |
| C  | -0.720229 | 1.706235  | 0.401745  |
| C  | 2.276433  | -0.652439 | 1.807085  |
| C  | 1.974475  | -1.859425 | 2.378277  |
| C  | 0.723006  | -2.073264 | 3.016126  |
| C  | -0.203652 | -1.080416 | 3.076385  |
| Br | 0.383451  | -3.759256 | 3.789586  |
| C  | -1.587616 | 2.268844  | -0.652666 |
| O  | -1.020957 | 3.340059  | -1.247885 |
| C  | -1.802378 | 3.976362  | -2.276035 |
| C  | -0.998626 | 5.146209  | -2.797176 |
| O  | -2.272323 | 0.070216  | 1.317256  |
| O  | -2.683271 | 1.850427  | -0.953977 |
| H  | -2.756367 | 4.291413  | -1.844759 |
| H  | -2.014617 | 3.241372  | -3.057164 |
| H  | -0.790963 | 5.865843  | -1.999750 |
| H  | -1.561113 | 5.658683  | -3.584157 |
| H  | -0.046092 | 4.811594  | -3.218582 |
| H  | 0.871049  | 3.088084  | 0.062916  |
| H  | 3.228428  | -0.479269 | 1.317637  |
| H  | 2.692326  | -2.672352 | 2.345735  |
| H  | -1.157503 | -1.235346 | 3.568211  |
| H  | -0.359999 | 1.051955  | 2.964609  |

**A-VII**

|    |           |           |           |
|----|-----------|-----------|-----------|
| C  | -0.035983 | 0.022744  | -0.052405 |
| C  | -0.029815 | 0.008043  | 1.475006  |
| C  | 1.342772  | 0.022662  | 2.087191  |
| N  | 2.376476  | 0.519101  | 1.480099  |
| C  | 2.224208  | 0.908737  | 0.166181  |
| C  | 1.125380  | 0.723881  | -0.617161 |
| C  | 1.475137  | -0.477469 | 3.434804  |
| C  | 0.467033  | -1.161742 | 4.016144  |
| C  | -0.779859 | -1.417776 | 3.315541  |
| C  | -1.017496 | -0.918346 | 2.098476  |
| Br | -2.030427 | -2.538935 | 4.178030  |
| C  | 1.114885  | 1.155371  | -2.040757 |
| O  | 2.358425  | 1.267542  | -2.544744 |
| C  | 2.449105  | 1.752419  | -3.898510 |
| C  | 3.915104  | 1.812478  | -4.262840 |
| O  | -0.946151 | -0.470530 | -0.682567 |
| O  | 0.117237  | 1.414683  | -2.670510 |
| H  | 1.969507  | 2.733900  | -3.949874 |
| H  | 1.889995  | 1.072492  | -4.546744 |
| H  | 4.457241  | 2.494736  | -3.601333 |
| H  | 4.024965  | 2.171927  | -5.290906 |
| H  | 4.376490  | 0.823145  | -4.193334 |
| H  | 3.105230  | 1.372944  | -0.264677 |
| H  | 2.429993  | -0.333474 | 3.928576  |
| H  | 0.584649  | -1.566475 | 5.015682  |
| H  | -1.924144 | -1.125945 | 1.542358  |
| H  | -0.399166 | 1.036430  | 1.693015  |

TS-A-VII

|    |           |           |           |
|----|-----------|-----------|-----------|
| C  | -0.189933 | -0.366105 | -0.042147 |
| C  | -0.032410 | -0.196812 | 1.435713  |
| C  | 1.250549  | -0.258219 | 2.072649  |
| N  | 2.382264  | -0.474665 | 1.387899  |
| C  | 2.247651  | -0.652885 | 0.071785  |
| C  | 1.070554  | -0.636209 | -0.681981 |
| C  | 1.277876  | -0.109288 | 3.476348  |
| C  | 0.131607  | 0.069000  | 4.232720  |
| C  | -1.123506 | 0.116855  | 3.628799  |
| C  | -1.233092 | 0.014464  | 2.232742  |
| Br | -2.671091 | 0.320748  | 4.665324  |
| C  | 1.118417  | -0.908920 | -2.135609 |
| O  | 2.390416  | -0.955212 | -2.603619 |
| C  | 2.531988  | -1.241113 | -4.003912 |
| C  | 4.011085  | -1.245087 | -4.320447 |
| O  | -1.312346 | -0.250277 | -0.532600 |
| O  | 0.160644  | -1.082761 | -2.852993 |
| H  | 1.992313  | -0.479635 | -4.573915 |
| H  | 2.064118  | -2.207007 | -4.214928 |
| H  | 4.461917  | -0.273747 | -4.096197 |
| H  | 4.161880  | -1.457047 | -5.383937 |
| H  | 4.534642  | -2.010903 | -3.740227 |
| H  | 3.176181  | -0.834917 | -0.459449 |
| H  | 2.249772  | -0.149567 | 3.958317  |
| H  | 0.207969  | 0.171017  | 5.309688  |
| H  | -2.183337 | -0.063244 | 1.712325  |
| H  | -0.664345 | 0.995974  | 1.741663  |



A-VIII

|    |           |           |           |
|----|-----------|-----------|-----------|
| C  | -0.005081 | -0.062680 | 0.014577  |
| C  | -0.018768 | -0.063249 | 1.475642  |
| C  | 1.167654  | -0.130272 | 2.221118  |
| N  | 2.414615  | -0.210335 | 1.684609  |
| C  | 2.442531  | -0.230709 | 0.362772  |
| C  | 1.334995  | -0.183682 | -0.505519 |
| C  | 1.055799  | -0.109205 | 3.621581  |
| C  | -0.166184 | -0.029072 | 4.314320  |
| C  | -1.328552 | 0.033156  | 3.599615  |
| C  | -1.336161 | 0.023301  | 2.130886  |
| Br | -2.968632 | 0.135398  | 4.482073  |
| C  | 1.557923  | -0.283833 | -1.966282 |
| O  | 2.830179  | 0.038272  | -2.309506 |
| C  | 3.149161  | -0.076740 | -3.704804 |
| C  | 4.596599  | 0.327712  | -3.876370 |
| O  | -1.070742 | 0.047131  | -0.608884 |
| O  | 0.735062  | -0.625353 | -2.783340 |
| H  | 2.472713  | 0.567601  | -4.273390 |
| H  | 2.969813  | -1.107924 | -4.023186 |
| H  | 4.755999  | 1.358576  | -3.546410 |
| H  | 4.879173  | 0.256208  | -4.931729 |
| H  | 5.257782  | -0.325390 | -3.298778 |
| H  | 3.429731  | -0.298893 | -0.083714 |
| H  | 1.985491  | -0.157122 | 4.183830  |
| H  | -0.175450 | -0.018467 | 5.398039  |
| H  | -1.983110 | -0.787245 | 1.753761  |
| H  | -1.870665 | 0.906551  | 1.739939  |

TS-A-VIII

|    |           |           |           |
|----|-----------|-----------|-----------|
| C  | -0.006288 | 0.049847  | -0.011229 |
| C  | 0.075575  | -0.167923 | 1.410552  |
| C  | 1.283858  | -0.131919 | 2.090388  |
| N  | 2.480444  | -0.200524 | 1.440436  |
| C  | 2.400005  | -0.245658 | 0.124890  |
| C  | 1.228196  | -0.126681 | -0.674229 |
| C  | 1.196851  | 0.127935  | 3.477723  |
| C  | -0.026518 | 0.286911  | 4.126037  |
| C  | -1.220113 | 0.116386  | 3.432488  |
| C  | -1.226362 | -0.143237 | 2.032655  |
| Br | -2.838971 | 0.138595  | 4.370461  |
| C  | 1.314676  | -0.090810 | -2.148649 |
| O  | 2.592750  | -0.061869 | -2.588758 |
| C  | 2.765512  | -0.043062 | -4.015705 |
| C  | 4.251517  | -0.004418 | -4.293920 |
| O  | -1.164061 | 0.387903  | -0.413918 |
| O  | 0.364590  | -0.094346 | -2.898206 |
| H  | 2.248601  | 0.832274  | -4.418616 |
| H  | 2.290703  | -0.933351 | -4.437844 |
| H  | 4.708131  | 0.889110  | -3.858079 |
| H  | 4.425251  | 0.012726  | -5.374689 |
| H  | 4.751430  | -0.885100 | -3.879696 |
| H  | 3.346116  | -0.333463 | -0.400091 |
| H  | 2.123194  | 0.259379  | 4.030735  |
| H  | -0.047663 | 0.506861  | 5.187244  |
| H  | -1.927871 | -0.940434 | 1.747716  |
| H  | -1.672434 | 0.527279  | 1.062755  |

4 (enol) - (Ethyl 6-bromo-4-hydroxyquinoline-3-carboxylate)

|    |           |           |           |
|----|-----------|-----------|-----------|
| C  | -0.001513 | 0.001645  | 0.005186  |
| C  | -0.000763 | 0.000099  | 1.437373  |
| C  | 1.254369  | 0.009439  | 2.093844  |
| N  | 2.442427  | 0.019698  | 1.428202  |
| C  | 2.397632  | 0.020855  | 0.122136  |
| C  | 1.212409  | 0.012026  | -0.662255 |
| C  | 1.283740  | 0.008156  | 3.509649  |
| C  | 0.126410  | -0.001742 | 4.241386  |
| C  | -1.116335 | -0.010915 | 3.575396  |
| C  | -1.188325 | -0.010170 | 2.208814  |
| Br | -2.704145 | -0.024431 | 4.601008  |
| C  | 1.296567  | 0.013545  | -2.146434 |
| O  | 2.576644  | 0.033920  | -2.569051 |
| C  | 2.770999  | 0.036233  | -3.995034 |
| C  | 4.260998  | 0.064268  | -4.250409 |
| O  | -1.147184 | -0.006313 | -0.688584 |
| O  | 0.357245  | -0.001500 | -2.907990 |
| H  | 2.264074  | 0.909836  | -4.413942 |
| H  | 2.297602  | -0.856827 | -4.412205 |
| H  | 4.715845  | 0.961059  | -3.819643 |
| H  | 4.450318  | 0.066870  | -5.328578 |
| H  | 4.749728  | -0.813737 | -3.818025 |
| H  | 3.350392  | 0.029129  | -0.396290 |
| H  | 2.256122  | 0.015362  | 3.990201  |
| H  | 0.154453  | -0.002618 | 5.325153  |
| H  | -2.171815 | -0.017722 | 1.749351  |
| H  | -1.911090 | -0.011745 | -0.095418 |

**TS-A-VII'**

|    |           |           |           |
|----|-----------|-----------|-----------|
| C  | -0.049278 | 0.140891  | -0.003582 |
| C  | -0.025443 | -0.072720 | 1.479466  |
| C  | 1.141567  | 0.343730  | 2.255205  |
| N  | 2.336680  | 0.714197  | 1.663936  |
| C  | 2.298413  | 0.843215  | 0.353357  |
| C  | 1.204686  | 0.629897  | -0.511313 |
| C  | 1.136334  | 0.012050  | 3.677588  |
| C  | 0.042261  | -0.535293 | 4.262002  |
| C  | -1.110445 | -0.841911 | 3.475919  |
| C  | -1.155351 | -0.608774 | 2.128407  |
| Br | -2.595928 | -1.580527 | 4.351126  |
| C  | 1.359336  | 0.881992  | -1.959566 |
| O  | 2.638927  | 1.192842  | -2.290388 |
| C  | 2.876114  | 1.467091  | -3.679803 |
| C  | 4.345407  | 1.790839  | -3.835848 |
| O  | -1.072513 | -0.166183 | -0.610322 |
| O  | 0.475253  | 0.836525  | -2.783632 |
| H  | 2.237092  | 2.299420  | -3.988334 |
| H  | 2.584491  | 0.590755  | -4.265518 |
| H  | 4.619154  | 2.668223  | -3.242112 |
| H  | 4.568401  | 2.003877  | -4.886350 |
| H  | 4.967944  | 0.949710  | -3.516348 |
| H  | 3.232171  | 1.158406  | -0.101562 |
| H  | 2.037498  | 0.240319  | 4.236779  |
| H  | 0.034390  | -0.762345 | 5.321870  |
| H  | -2.016400 | -0.844952 | 1.513254  |
| H  | 0.407191  | 1.273149  | 2.218227  |

A-VIII'

|    |           |           |           |
|----|-----------|-----------|-----------|
| C  | -0.028957 | -0.120099 | 0.025427  |
| C  | -0.010051 | -0.123861 | 1.417695  |
| C  | 1.268236  | -0.091799 | 2.141370  |
| C  | 2.453432  | 0.266729  | 1.337605  |
| C  | 2.396331  | 0.295473  | -0.015215 |
| C  | 1.145465  | 0.083817  | -0.667437 |
| N  | 1.321241  | 0.212774  | 3.524169  |
| C  | 0.163414  | 0.235048  | 4.126957  |
| C  | -1.126584 | 0.027832  | 3.565247  |
| C  | -1.291288 | -0.254705 | 2.165591  |
| O  | -2.318923 | -0.519239 | 1.541300  |
| C  | -2.315145 | 0.125261  | 4.436673  |
| O  | -3.463707 | 0.192059  | 4.063041  |
| Br | 1.123140  | 0.111628  | -2.536976 |
| O  | -1.981780 | 0.146472  | 5.753514  |
| C  | -3.077095 | 0.275476  | 6.672842  |
| C  | -2.501523 | 0.266612  | 8.071671  |
| H  | -3.771760 | -0.553261 | 6.509487  |
| H  | -3.612579 | 1.204106  | 6.454774  |
| H  | -1.965094 | -0.666508 | 8.268099  |
| H  | -3.308826 | 0.360253  | 8.805274  |
| H  | -1.808013 | 1.100550  | 8.216473  |
| H  | 0.204765  | 0.438629  | 5.193065  |
| H  | 3.379215  | 0.429322  | 1.880474  |
| H  | 3.278132  | 0.502096  | -0.610393 |
| H  | -0.985261 | -0.243243 | -0.471162 |
| H  | 1.422726  | -1.215685 | 2.135377  |

**TS-A-VIII'**

|    |           |           |           |
|----|-----------|-----------|-----------|
| C  | 0.041145  | -0.000385 | 0.005313  |
| C  | 0.011024  | -0.001639 | 1.485889  |
| C  | 1.227139  | -0.087472 | 2.242959  |
| N  | 2.505653  | -0.328167 | 1.624940  |
| C  | 2.472097  | -0.393217 | 0.289670  |
| C  | 1.357868  | -0.305009 | -0.532283 |
| C  | 1.129876  | -0.224051 | 3.678201  |
| C  | -0.080550 | -0.119689 | 4.296399  |
| C  | -1.254065 | 0.056907  | 3.524347  |
| C  | -1.213279 | 0.106603  | 2.148896  |
| Br | -2.898260 | 0.205136  | 4.422441  |
| C  | 1.519419  | -0.530737 | -1.992345 |
| O  | 2.755613  | -0.191404 | -2.420238 |
| C  | 3.025596  | -0.436057 | -3.812868 |
| C  | 4.442638  | 0.013750  | -4.088430 |
| O  | -0.973856 | 0.229457  | -0.643560 |
| O  | 0.673652  | -0.990299 | -2.720764 |
| H  | 2.294412  | 0.115575  | -4.409798 |
| H  | 2.884184  | -1.501832 | -4.013891 |
| H  | 4.563610  | 1.079529  | -3.873543 |
| H  | 4.685026  | -0.154275 | -5.142629 |
| H  | 5.158559  | -0.545674 | -3.478761 |
| H  | 3.443643  | -0.550187 | -0.168812 |
| H  | 2.048811  | -0.368123 | 4.236949  |
| H  | -0.155326 | -0.188388 | 5.375626  |
| H  | -2.108881 | 0.214431  | 1.547303  |
| H  | 1.831187  | 0.924683  | 2.116430  |

4 (keto) (Ethyl 6-bromo-4-oxo-1,4-dihydroquinoline-3-carboxylate)

|    |           |           |           |
|----|-----------|-----------|-----------|
| C  | 0.010800  | 0.005564  | 0.005718  |
| C  | 0.012089  | 0.002161  | 1.498172  |
| C  | 1.201669  | -0.006745 | 2.231844  |
| N  | 2.405409  | -0.015073 | 1.542351  |
| C  | 2.457024  | -0.021550 | 0.192469  |
| C  | 1.348832  | -0.019594 | -0.603746 |
| C  | 1.175082  | -0.006352 | 3.631649  |
| C  | -0.037642 | 0.004125  | 4.291006  |
| C  | -1.228794 | 0.013885  | 3.557312  |
| C  | -1.209719 | 0.012757  | 2.179303  |
| Br | -2.877740 | 0.030716  | 4.483613  |
| C  | 1.523676  | -0.049077 | -2.075827 |
| O  | 2.831039  | 0.072706  | -2.428127 |
| C  | 3.102625  | 0.034099  | -3.839511 |
| C  | 4.595259  | 0.194877  | -4.022065 |
| O  | -1.042203 | 0.035732  | -0.611544 |
| O  | 0.645294  | -0.171433 | -2.892895 |
| H  | 2.540962  | 0.836498  | -4.325350 |
| H  | 2.739492  | -0.916237 | -4.240598 |
| H  | 4.940417  | 1.147883  | -3.609856 |
| H  | 4.841682  | 0.173814  | -5.088433 |
| H  | 5.141708  | -0.615157 | -3.529271 |
| H  | 3.449762  | -0.030766 | -0.239895 |
| H  | 2.103268  | -0.013582 | 4.196953  |
| H  | -0.068277 | 0.005033  | 5.374728  |
| H  | -2.119855 | 0.021590  | 1.590566  |
| H  | 3.267695  | -0.020540 | 2.068024  |

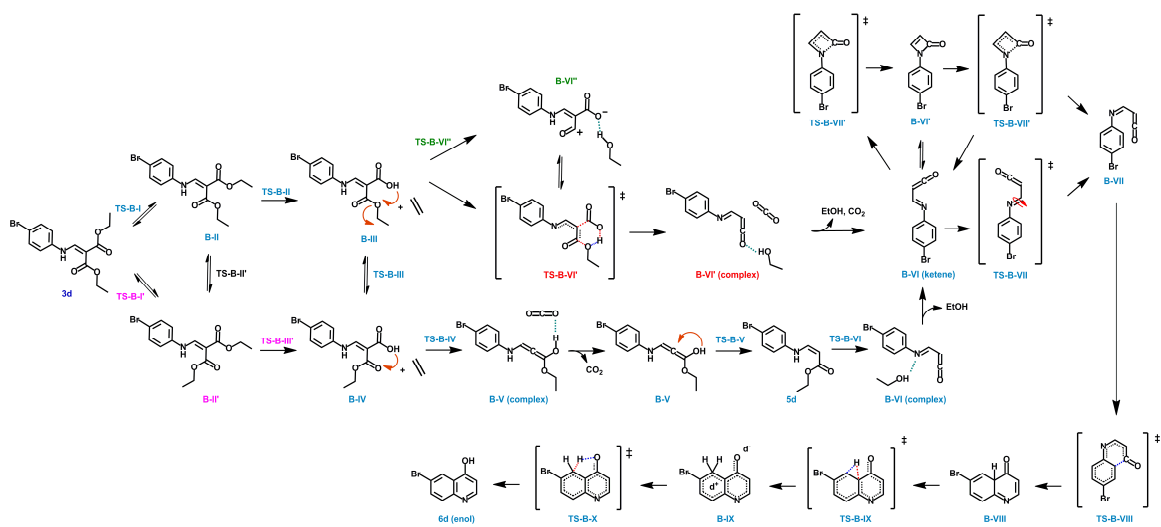

**Scheme S5.** Mechanism proposed for the formation of quinolone **6d** (Path B).



## Step 2 - Pathway B (R = Br)

### B-II

|    |           |           |           |
|----|-----------|-----------|-----------|
| C  | 0.088304  | 0.300518  | 0.003165  |
| C  | 0.053141  | -0.017756 | 1.350727  |
| C  | 1.220206  | -0.329541 | 2.029939  |
| C  | 2.425367  | -0.330965 | 1.348862  |
| C  | 2.475783  | -0.017622 | -0.007814 |
| C  | 1.297662  | 0.308314  | -0.674466 |
| Br | -1.606712 | -0.018034 | 2.276730  |
| N  | 3.731220  | -0.029568 | -0.638520 |
| C  | 3.958949  | -0.008735 | -1.952335 |
| C  | 5.183579  | 0.005416  | -2.574165 |
| C  | 5.097233  | -0.005961 | -4.051388 |
| O  | 6.267343  | -0.139740 | -4.678052 |
| C  | 6.236846  | -0.156691 | -6.117211 |
| C  | 6.216416  | 1.245734  | -6.687444 |
| C  | 6.394184  | 0.032043  | -1.752781 |
| O  | 6.356231  | -0.039943 | -0.529388 |
| O  | 7.543548  | 0.157271  | -2.408574 |
| C  | 8.750860  | 0.198522  | -1.623941 |
| C  | 9.036889  | 1.598012  | -1.122656 |
| O  | 4.043104  | 0.075440  | -4.647726 |
| H  | 9.997129  | 1.612543  | -0.601731 |
| H  | 8.265474  | 1.925893  | -0.425844 |
| H  | 9.088434  | 2.302869  | -1.954309 |
| H  | 8.662995  | -0.508487 | -0.799807 |
| H  | 9.522789  | -0.142130 | -2.312681 |
| H  | 7.148739  | -0.684344 | -6.394081 |
| H  | 5.371341  | -0.730586 | -6.447048 |
| H  | 7.067700  | 1.823151  | -6.322501 |
| H  | 5.294523  | 1.760120  | -6.415975 |
| H  | 6.274785  | 1.200540  | -7.777553 |
| H  | 3.095569  | -0.011814 | -2.605671 |
| H  | 1.306602  | 0.585284  | -1.720086 |
| H  | -0.823523 | 0.554513  | -0.520473 |
| H  | 1.191378  | -0.574999 | 3.083036  |
| H  | 3.339013  | -0.584020 | 1.874198  |
| H  | 4.574813  | -0.072736 | -0.065927 |

**B-II'**

|    |           |           |           |
|----|-----------|-----------|-----------|
| C  | 0.142733  | -0.047625 | -0.190895 |
| C  | 0.085952  | -0.415333 | 1.144093  |
| C  | 1.241491  | -0.395828 | 1.906039  |
| C  | 2.456099  | -0.003323 | 1.347297  |
| C  | 2.495338  | 0.380913  | 0.009480  |
| C  | 1.341958  | 0.349028  | -0.759149 |
| N  | 3.593210  | 0.005936  | 2.172669  |
| C  | 4.866721  | 0.025592  | 1.757344  |
| C  | 6.011269  | 0.077062  | 2.502079  |
| C  | 6.053301  | 0.204077  | 3.965078  |
| O  | 4.818235  | -0.008032 | 4.525217  |
| C  | 4.731533  | 0.118113  | 5.959784  |
| C  | 5.130526  | -1.165758 | 6.654488  |
| Br | -1.437203 | -0.080980 | -1.246346 |
| C  | 7.248375  | 0.041611  | 1.684205  |
| O  | 7.251314  | 0.158106  | 0.476790  |
| O  | 8.356945  | -0.169247 | 2.388175  |
| C  | 9.588474  | -0.206794 | 1.646943  |
| C  | 10.703256 | -0.424299 | 2.641181  |
| O  | 7.002226  | 0.484029  | 4.644809  |
| H  | 6.179847  | -1.394296 | 6.468768  |
| H  | 4.518179  | -2.001533 | 6.310604  |
| H  | 4.989160  | -1.058998 | 7.732539  |
| H  | 5.360278  | 0.950195  | 6.273497  |
| H  | 3.686929  | 0.366222  | 6.148686  |
| H  | 9.531027  | -1.009123 | 0.909024  |
| H  | 9.698813  | 0.734077  | 1.105073  |
| H  | 10.570979 | -1.367347 | 3.173569  |
| H  | 10.730204 | 0.382453  | 3.374662  |
| H  | 11.662599 | -0.453458 | 2.120052  |
| H  | 5.018867  | -0.008740 | 0.685451  |
| H  | 3.415569  | 0.724539  | -0.443668 |
| H  | 1.379855  | 0.647921  | -1.798084 |
| H  | -0.851683 | -0.723139 | 1.587037  |
| H  | 1.201747  | -0.698446 | 2.946248  |
| H  | 3.457609  | -0.038311 | 3.175473  |

TS-B-II

|    |           |           |           |
|----|-----------|-----------|-----------|
| C  | 0.018436  | -0.145947 | 0.059568  |
| C  | 0.044901  | 0.101180  | 1.422876  |
| C  | 1.261917  | 0.178588  | 2.077777  |
| C  | 2.457911  | 0.005935  | 1.382743  |
| C  | 2.415119  | -0.255662 | 0.015257  |
| C  | 1.197773  | -0.324028 | -0.644376 |
| N  | 3.656955  | 0.089813  | 2.106274  |
| C  | 4.889903  | 0.180880  | 1.594593  |
| C  | 6.068561  | 0.234754  | 2.290473  |
| C  | 6.030225  | 0.138411  | 3.743806  |
| O  | 7.217419  | 0.001915  | 4.353035  |
| C  | 7.208214  | -0.099213 | 5.789607  |
| C  | 7.141267  | 1.264436  | 6.444062  |
| Br | -1.648352 | -0.248089 | -0.849841 |
| C  | 7.281914  | 0.390954  | 1.426932  |
| O  | 7.209082  | 0.225870  | 0.219484  |
| O  | 8.397572  | 0.740529  | 2.014731  |
| C  | 10.411614 | 0.156182  | 1.812758  |
| C  | 10.427371 | -0.091808 | 3.179041  |
| O  | 4.988911  | 0.135261  | 4.388757  |
| H  | 7.217462  | 1.155756  | 7.528562  |
| H  | 6.196444  | 1.757147  | 6.215533  |
| H  | 7.962352  | 1.898249  | 6.104321  |
| H  | 6.372615  | -0.727404 | 6.095785  |
| H  | 8.143994  | -0.605948 | 6.024729  |
| H  | 10.186147 | -0.617882 | 1.090417  |
| H  | 10.693902 | 1.116173  | 1.402613  |
| H  | 9.183444  | 0.275395  | 3.047476  |
| H  | 10.903291 | 0.627868  | 3.835586  |
| H  | 10.397566 | -1.120083 | 3.522214  |
| H  | 4.980959  | 0.222331  | 0.516459  |
| H  | 3.322927  | -0.421346 | -0.548915 |
| H  | 1.172694  | -0.526870 | -1.706659 |
| H  | -0.876943 | 0.237920  | 1.972180  |
| H  | 1.286395  | 0.381350  | 3.142284  |
| H  | 3.618627  | 0.101843  | 3.124288  |

**B-III**

|    |           |           |           |
|----|-----------|-----------|-----------|
| C  | 0.023282  | -0.002035 | 0.086354  |
| C  | 0.094205  | 0.229018  | 1.450951  |
| C  | 1.328245  | 0.228211  | 2.078634  |
| C  | 2.492273  | -0.007679 | 1.352183  |
| C  | 2.406980  | -0.254875 | -0.014499 |
| C  | 1.173596  | -0.243715 | -0.647041 |
| N  | 3.716077  | -0.001797 | 2.049640  |
| Br | -1.664988 | 0.005359  | -0.783984 |
| H  | 1.111960  | -0.435544 | -1.709866 |
| H  | 3.290806  | -0.472847 | -0.598939 |
| H  | 1.389210  | 0.420012  | 3.143706  |
| H  | -0.805612 | 0.414529  | 2.021893  |
| C  | 4.930664  | 0.080353  | 1.513003  |
| C  | 6.128425  | 0.067954  | 2.188440  |
| C  | 7.329735  | 0.178084  | 1.309959  |
| C  | 6.116624  | -0.038960 | 3.635963  |
| H  | 3.697237  | -0.051791 | 3.067183  |
| H  | 4.998205  | 0.174437  | 0.435878  |
| O  | 7.234034  | 0.267302  | 0.111706  |
| O  | 8.535203  | 0.174850  | 1.888569  |
| O  | 5.107289  | -0.109101 | 4.316302  |
| O  | 7.343027  | -0.059290 | 4.209135  |
| C  | 7.418052  | -0.138433 | 5.653009  |
| H  | 6.633807  | -0.809797 | 5.997985  |
| H  | 8.390794  | -0.589455 | 5.842423  |
| C  | 7.301188  | 1.230847  | 6.283599  |
| H  | 6.320704  | 1.665676  | 6.089647  |
| H  | 7.428490  | 1.144811  | 7.364996  |
| H  | 8.071442  | 1.903128  | 5.902080  |
| H  | 8.440860  | 0.092922  | 2.852238  |

TS-B-III

|    |           |           |           |
|----|-----------|-----------|-----------|
| C  | -2.906199 | 1.023824  | 0.788835  |
| C  | -1.525641 | 1.013849  | 0.888554  |
| C  | -0.772028 | 0.055713  | 0.213539  |
| C  | -1.422548 | -0.891676 | -0.572423 |
| C  | -2.806458 | -0.893821 | -0.659293 |
| C  | -3.542926 | 0.062881  | 0.018987  |
| N  | 0.626821  | 0.089560  | 0.332082  |
| C  | 1.463942  | -0.955982 | 0.118982  |
| C  | 2.808496  | -0.914301 | 0.147184  |
| C  | 3.554124  | 0.362954  | 0.352117  |
| O  | 3.922256  | 0.906391  | -0.808456 |
| C  | 4.687539  | 2.133311  | -0.764700 |
| C  | 3.781627  | 3.341389  | -0.672177 |
| Br | -5.438372 | 0.065705  | -0.114419 |
| C  | 3.542110  | -2.185283 | -0.017179 |
| O  | 3.058520  | -3.190795 | -0.457943 |
| O  | 4.841548  | -2.174887 | 0.367933  |
| O  | 3.812560  | 0.845725  | 1.429410  |
| H  | 0.999604  | -1.915992 | -0.071944 |
| H  | -0.859698 | -1.620903 | -1.139907 |
| H  | -3.305737 | -1.633405 | -1.270799 |
| H  | -3.482976 | 1.770846  | 1.317402  |
| H  | -1.029257 | 1.752973  | 1.507469  |
| H  | 5.250245  | 2.125039  | -1.696359 |
| H  | 5.376619  | 2.085131  | 0.077918  |
| H  | 3.063610  | 3.349962  | -1.493895 |
| H  | 4.380119  | 4.252822  | -0.733103 |
| H  | 3.243774  | 3.355788  | 0.276487  |
| H  | 1.021730  | 0.942789  | 0.699697  |
| H  | 5.045957  | -1.400280 | 0.905010  |

TS-B-III'

|    |           |           |           |
|----|-----------|-----------|-----------|
| C  | 0.102874  | -0.252016 | 0.027409  |
| C  | 0.046246  | -0.002521 | 1.397924  |
| C  | 1.219022  | 0.325956  | 2.074449  |
| C  | 2.425236  | 0.382263  | 1.393513  |
| C  | 2.465038  | 0.128351  | 0.032618  |
| C  | 1.304313  | -0.184139 | -0.656754 |
| N  | -1.202019 | -0.076331 | 2.033728  |
| C  | -1.410408 | -0.150502 | 3.359533  |
| C  | -2.587434 | -0.174789 | 4.046337  |
| C  | -3.906884 | -0.032670 | 3.435579  |
| O  | -3.866072 | -0.139189 | 2.071426  |
| C  | -5.113878 | 0.019906  | 1.367100  |
| C  | -5.892752 | -1.276919 | 1.318703  |
| Br | 4.121109  | 0.215970  | -0.897238 |
| C  | -2.424597 | -0.312786 | 5.535778  |
| O  | -1.342489 | -0.108705 | 6.063773  |
| O  | -3.483781 | -0.686035 | 6.193100  |
| C  | -4.550194 | -0.078014 | 7.937172  |
| C  | -5.693461 | -0.002190 | 7.156585  |
| O  | -4.950836 | 0.189190  | 4.002577  |
| H  | -6.798930 | -1.139544 | 0.723983  |
| H  | -6.185233 | -1.587915 | 2.321416  |
| H  | -5.299819 | -2.070468 | 0.860168  |
| H  | -5.688162 | 0.809526  | 1.849650  |
| H  | -4.823090 | 0.347016  | 0.368679  |
| H  | -4.270513 | -0.983425 | 8.458287  |
| H  | -3.911935 | 0.780147  | 8.104106  |
| H  | -4.864112 | -0.327075 | 6.236161  |
| H  | -6.062854 | 0.971214  | 6.855159  |
| H  | -6.419893 | -0.805111 | 7.211077  |
| H  | -0.525854 | -0.199472 | 3.983038  |
| H  | 1.205404  | 0.555579  | 3.131298  |
| H  | 3.331290  | 0.637163  | 1.926715  |
| H  | 1.335826  | -0.381118 | -1.719970 |
| H  | -0.803260 | -0.510801 | -0.508614 |
| H  | -2.030417 | -0.101688 | 1.453249  |

**B-IV**

|    |           |           |           |
|----|-----------|-----------|-----------|
| C  | -0.103099 | -0.024099 | -0.062479 |
| C  | -0.032079 | 0.333059  | 1.280493  |
| C  | 1.188815  | 0.329129  | 1.936883  |
| C  | 2.342168  | -0.012470 | 1.249335  |
| C  | 2.286240  | -0.352551 | -0.092952 |
| C  | 1.063696  | -0.361106 | -0.742896 |
| N  | -1.317450 | -0.040593 | -0.777879 |
| Br | 4.013585  | -0.007369 | 2.150765  |
| C  | -2.540088 | -0.088205 | -0.244645 |
| C  | -3.752034 | -0.075979 | -0.881072 |
| C  | -3.936105 | -0.000210 | -2.319143 |
| H  | -2.596301 | -0.154207 | 0.835799  |
| H  | -0.917618 | 0.632377  | 1.824973  |
| H  | 1.239019  | 0.606156  | 2.981304  |
| H  | 3.188281  | -0.617226 | -0.628004 |
| H  | 1.015523  | -0.642764 | -1.788640 |
| O  | -2.785688 | 0.032037  | -3.024852 |
| C  | -2.896187 | 0.099833  | -4.468452 |
| C  | -3.100182 | -1.271689 | -5.071961 |
| H  | -1.953468 | 0.544057  | -4.785012 |
| H  | -3.713632 | 0.773668  | -4.718504 |
| H  | -2.291739 | -1.948161 | -4.788764 |
| H  | -3.111184 | -1.190874 | -6.161111 |
| H  | -4.050432 | -1.698868 | -4.752731 |
| H  | -1.269028 | -0.030399 | -1.789104 |
| O  | -5.018277 | 0.034483  | -2.880940 |
| H  | -6.043371 | -0.059521 | -1.502302 |
| C  | -4.933684 | -0.145612 | 0.036116  |
| O  | -4.806975 | -0.215328 | 1.233516  |
| O  | -6.138329 | -0.126235 | -0.528129 |

TS-B-IV

|    |           |           |           |
|----|-----------|-----------|-----------|
| C  | 0.368750  | 0.424584  | -0.079698 |
| C  | 0.148181  | 0.096470  | 1.258938  |
| C  | 1.215405  | -0.379765 | 2.019630  |
| C  | 2.465925  | -0.546573 | 1.444303  |
| C  | 2.665698  | -0.220237 | 0.113759  |
| C  | 1.620059  | 0.273287  | -0.650811 |
| N  | -1.132586 | 0.270903  | 1.791298  |
| C  | -1.613650 | -0.264812 | 2.953384  |
| C  | -2.746534 | 0.079486  | 3.570600  |
| C  | -2.496930 | -0.273175 | 5.837984  |
| O  | -3.237353 | 0.547958  | 6.251243  |
| Br | 4.385770  | -0.441512 | -0.666672 |
| C  | -3.938027 | 0.618469  | 3.250655  |
| O  | -4.633289 | 1.407493  | 4.070527  |
| O  | -4.568973 | 0.337661  | 2.110737  |
| C  | -6.003143 | 0.503833  | 2.020363  |
| C  | -6.735582 | -0.611495 | 2.733200  |
| O  | -1.714665 | -1.136903 | 5.842946  |
| H  | -0.963543 | -1.006214 | 3.408917  |
| H  | 1.088847  | -0.605643 | 3.069630  |
| H  | 3.287077  | -0.917703 | 2.042984  |
| H  | 1.776862  | 0.530927  | -1.689806 |
| H  | -0.452363 | 0.794095  | -0.683870 |
| H  | -6.193215 | 0.481739  | 0.948518  |
| H  | -6.277752 | 1.483162  | 2.409076  |
| H  | -6.434223 | -1.584436 | 2.342183  |
| H  | -7.811382 | -0.497690 | 2.581709  |
| H  | -6.541352 | -0.586916 | 3.806128  |
| H  | -1.771800 | 0.843586  | 1.260497  |
| H  | -4.192629 | 1.399279  | 4.941090  |



## B-V (complex)

|    |           |           |           |           |
|----|-----------|-----------|-----------|-----------|
| C  | 2.798518  | 0.564448  | 0.642390  | -0.962671 |
| C  | 3.667874  | -0.304339 | 0.006673  | 0.596314  |
| C  | 3.174932  | -1.329402 | -0.786522 | -0.339377 |
| C  | 1.808470  | -1.490014 | -0.926131 | -0.527576 |
| C  | 0.912689  | -0.626171 | -0.288242 | -0.296571 |
| C  | 1.428113  | 0.413648  | 0.488499  | 1.057141  |
| Br | 5.547678  | -0.086548 | 0.211979  | -0.121964 |
| N  | -0.452459 | -0.822093 | -0.462412 | 0.022010  |
| C  | -1.464278 | -0.284833 | 0.321568  | -0.528008 |
| C  | -2.739808 | -0.303990 | 0.020909  | 1.051050  |
| C  | -3.980500 | -0.498847 | -0.348928 | -1.116050 |
| O  | -4.623699 | -1.664938 | -0.144351 | -0.077287 |
| C  | -6.019363 | -1.614725 | 0.200020  | -0.257299 |
| C  | -6.242395 | -1.051113 | 1.587657  | -0.361003 |
| C  | -2.147312 | 3.003272  | -0.194129 | 0.485970  |
| O  | -1.194745 | 3.102563  | 0.447784  | -0.199524 |
| O  | -3.105578 | 2.925480  | -0.841272 | -0.262856 |
| O  | -4.759504 | 0.409850  | -0.997339 | -0.235275 |
| H  | -1.110742 | 0.150040  | 1.252255  | 0.150783  |
| H  | 0.768664  | 1.131768  | 0.956656  | 0.144653  |
| H  | 3.184126  | 1.374662  | 1.247114  | 0.153341  |
| H  | 3.853683  | -2.007704 | -1.286391 | 0.153673  |
| H  | 1.426574  | -2.304710 | -1.531284 | 0.123415  |
| H  | -6.335842 | -2.655357 | 0.143081  | 0.157877  |
| H  | -6.560212 | -1.043724 | -0.554727 | 0.171765  |
| H  | -5.692254 | -1.627142 | 2.333562  | 0.152627  |
| H  | -7.305810 | -1.090226 | 1.835161  | 0.144316  |
| H  | -5.921994 | -0.009250 | 1.646152  | 0.149953  |
| H  | -0.741931 | -1.428952 | -1.213036 | 0.266481  |
| H  | -4.279186 | 1.243213  | -1.072102 | 0.304054  |

**B-V**

|    |           |           |           |
|----|-----------|-----------|-----------|
| C  | 0.000919  | -0.088583 | -0.021743 |
| C  | -0.026873 | -0.098806 | 1.365119  |
| C  | 1.152454  | -0.020390 | 2.084200  |
| C  | 2.367528  | 0.068109  | 1.421917  |
| C  | 2.395781  | 0.064749  | 0.039582  |
| C  | 1.215682  | -0.017365 | -0.707268 |
| Br | 1.107924  | -0.027373 | 3.986818  |
| N  | 1.300325  | -0.010408 | -2.093431 |
| C  | 0.283873  | -0.313633 | -2.987631 |
| C  | 0.352562  | -0.154016 | -4.285223 |
| C  | 0.494409  | -0.018301 | -5.575780 |
| O  | 0.065492  | 1.063528  | -6.296259 |
| O  | 1.128190  | -0.918596 | -6.351782 |
| C  | 0.566331  | -1.198899 | -7.645943 |
| C  | -0.757304 | -1.927500 | -7.545378 |
| H  | -0.602807 | -0.735701 | -2.524796 |
| H  | -0.936962 | -0.117903 | -0.558875 |
| H  | -0.976042 | -0.155396 | 1.881471  |
| H  | 3.291213  | 0.131765  | 1.981742  |
| H  | 3.349709  | 0.119092  | -0.473247 |
| H  | 1.321617  | -1.819413 | -8.126234 |
| H  | 0.468977  | -0.270251 | -8.208924 |
| H  | -0.648117 | -2.854667 | -6.980337 |
| H  | -1.120919 | -2.172278 | -8.546094 |
| H  | -1.511616 | -1.308765 | -7.055542 |
| H  | 2.195138  | 0.216162  | -2.497785 |
| H  | -0.415943 | 1.647853  | -5.702718 |

TS-B-V

|    |           |           |           |
|----|-----------|-----------|-----------|
| C  | 0.789043  | -0.885400 | -0.472094 |
| C  | 0.225484  | 0.335947  | -0.095503 |
| C  | 1.071615  | 1.355624  | 0.341385  |
| C  | 2.443769  | 1.160633  | 0.381499  |
| C  | 2.983474  | -0.056438 | 0.001636  |
| C  | 2.156981  | -1.085594 | -0.421203 |
| N  | -1.161985 | 0.475379  | -0.159098 |
| C  | -1.883203 | 1.635955  | -0.075097 |
| C  | -3.231220 | 1.755116  | -0.086953 |
| C  | -4.120461 | 0.661700  | -0.177111 |
| O  | -5.324929 | 1.110776  | -0.131059 |
| Br | 4.865904  | -0.321073 | 0.068251  |
| O  | -3.868063 | -0.622227 | -0.302034 |
| C  | -4.985927 | -1.552198 | -0.357699 |
| C  | -5.484115 | -1.886681 | 1.029058  |
| H  | -1.272092 | 2.529089  | -0.004821 |
| H  | 0.672082  | 2.304421  | 0.671233  |
| H  | 3.089334  | 1.959228  | 0.722251  |
| H  | 2.577195  | -2.037609 | -0.717053 |
| H  | 0.145741  | -1.687462 | -0.816758 |
| H  | -4.575162 | -2.424481 | -0.863224 |
| H  | -5.765473 | -1.107806 | -0.974714 |
| H  | -4.681622 | -2.299792 | 1.642217  |
| H  | -6.278586 | -2.632729 | 0.957395  |
| H  | -5.890591 | -1.002697 | 1.520328  |
| H  | -1.693190 | -0.371976 | -0.302034 |
| H  | -4.749082 | 2.141336  | -0.052707 |

## 5 (ethyl 3-((4-bromophenyl)amino)acrylate)

|    |           |           |           |
|----|-----------|-----------|-----------|
| C  | 0.123940  | 0.100893  | 0.020543  |
| C  | 0.085105  | 0.023864  | 1.414486  |
| C  | 1.290740  | -0.019555 | 2.113813  |
| C  | 2.499158  | 0.015240  | 1.434050  |
| C  | 2.517067  | 0.091777  | 0.052242  |
| C  | 1.328114  | 0.134196  | -0.659077 |
| N  | -1.166559 | -0.006702 | 2.033124  |
| C  | -1.420804 | -0.050257 | 3.365225  |
| C  | -2.627376 | -0.084744 | 3.970789  |
| C  | -3.938997 | -0.084730 | 3.340365  |
| O  | -4.988138 | -0.108935 | 3.934879  |
| Br | 4.177036  | 0.137451  | -0.873727 |
| O  | -3.884220 | -0.049758 | 1.975294  |
| C  | -5.145346 | -0.058332 | 1.275322  |
| C  | -5.678715 | -1.464720 | 1.107268  |
| H  | -0.545157 | -0.055510 | 4.001049  |
| H  | 1.310802  | -0.082674 | 3.192866  |
| H  | 3.427267  | -0.019159 | 1.988956  |
| H  | 1.339011  | 0.193898  | -1.739177 |
| H  | -0.804398 | 0.136031  | -0.538451 |
| H  | -4.924958 | 0.403560  | 0.313098  |
| H  | -5.848673 | 0.568748  | 1.821715  |
| H  | -4.956202 | -2.096601 | 0.587088  |
| H  | -6.598180 | -1.440632 | 0.517680  |
| H  | -5.906298 | -1.908654 | 2.076238  |
| H  | -1.984880 | 0.004916  | 1.437990  |
| H  | -2.655857 | -0.114011 | 5.049767  |

**TS-B-VI**

|    |           |           |           |
|----|-----------|-----------|-----------|
| C  | 0.058222  | -0.573592 | 0.064130  |
| C  | 0.018119  | -0.112588 | 1.372033  |
| C  | 1.151579  | 0.403682  | 1.976502  |
| C  | 2.337112  | 0.471600  | 1.258481  |
| C  | 2.393880  | 0.031097  | -0.063341 |
| C  | 1.246673  | -0.509711 | -0.642981 |
| Br | -1.609108 | -0.210478 | 2.352932  |
| N  | 3.578608  | 0.062450  | -0.822668 |
| C  | 4.302739  | 1.114524  | -0.796462 |
| C  | 5.562402  | 1.337345  | -1.453263 |
| C  | 6.338899  | 0.566707  | -2.215870 |
| O  | 5.364487  | -1.698515 | -1.800188 |
| C  | 5.211023  | -2.723496 | -2.765168 |
| C  | 4.411932  | -2.284844 | -3.981110 |
| O  | 7.145715  | 0.143035  | -2.910870 |
| H  | 3.959230  | 1.991608  | -0.238580 |
| H  | 1.294627  | -0.869663 | -1.663227 |
| H  | -0.830808 | -0.983141 | -0.396688 |
| H  | 1.116626  | 0.740041  | 3.004264  |
| H  | 3.233212  | 0.841060  | 1.742102  |
| H  | 4.745108  | -3.602902 | -2.303697 |
| H  | 6.220961  | -3.013868 | -3.061857 |
| H  | 3.396920  | -1.992824 | -3.699749 |
| H  | 4.338137  | -3.100624 | -4.704879 |
| H  | 4.888460  | -1.434074 | -4.472425 |
| H  | 4.502217  | -1.354639 | -1.492325 |
| H  | 5.994191  | 2.328476  | -1.358399 |

**B-VI (complex)**

|    |           |           |           |
|----|-----------|-----------|-----------|
| C  | -0.219953 | 0.466700  | 0.742981  |
| C  | 0.052259  | 0.579107  | 2.095894  |
| C  | 1.223357  | 0.040349  | 2.628904  |
| C  | 2.096420  | -0.651218 | 1.790467  |
| C  | 1.824236  | -0.774191 | 0.435400  |
| C  | 0.670542  | -0.207994 | -0.079757 |
| N  | 1.453069  | 0.178561  | 4.013192  |
| C  | 2.622514  | 0.480423  | 4.420942  |
| C  | 2.993573  | 0.591110  | 5.812348  |
| C  | 2.162666  | 0.303716  | 6.803147  |
| O  | -1.112046 | 0.582340  | 5.340361  |
| C  | -1.975715 | -0.538813 | 5.331494  |
| C  | -1.503685 | -1.656880 | 6.245961  |
| Br | 0.291238  | -0.375861 | -1.936333 |
| O  | 1.472248  | 0.049475  | 7.680127  |
| H  | 3.431279  | 0.688962  | 3.714191  |
| H  | 2.980080  | -1.124124 | 2.201826  |
| H  | 2.500947  | -1.317927 | -0.210298 |
| H  | -1.122716 | 0.897723  | 0.331056  |
| H  | -0.636155 | 1.094544  | 2.755027  |
| H  | -2.102528 | -0.919812 | 4.308972  |
| H  | -2.949681 | -0.171047 | 5.661024  |
| H  | -0.541904 | -2.055357 | 5.912191  |
| H  | -2.222892 | -2.480518 | 6.252531  |
| H  | -1.385300 | -1.290556 | 7.267471  |
| H  | -0.251236 | 0.331815  | 4.964673  |
| H  | 3.983625  | 0.918118  | 6.098616  |

**TS-B-VI'**

|    |           |           |           |
|----|-----------|-----------|-----------|
| C  | 0.110422  | -0.680926 | -0.235292 |
| C  | -0.018805 | -1.124472 | 1.071408  |
| C  | 1.009684  | -0.913335 | 1.976317  |
| C  | 2.169018  | -0.260103 | 1.588118  |
| C  | 2.289596  | 0.197210  | 0.286445  |
| C  | 1.261017  | -0.006491 | -0.626078 |
| Br | 0.834436  | -1.534889 | 3.759788  |
| N  | 1.431348  | 0.469778  | -1.950438 |
| C  | 0.453655  | 0.798942  | -2.793511 |
| C  | 0.556673  | 1.218114  | -4.087322 |
| C  | -1.102198 | 1.354210  | -4.978637 |
| O  | -0.924710 | 1.363170  | -6.165867 |
| C  | 1.621568  | 1.511378  | -4.802156 |
| O  | 2.458711  | 1.861877  | -5.502818 |
| O  | 1.051086  | -0.600338 | -6.737672 |
| C  | 1.732652  | -0.551652 | -7.980328 |
| C  | 2.894590  | -1.518626 | -7.928162 |
| O  | -1.923799 | 1.375269  | -4.111784 |
| H  | -0.559079 | 0.727945  | -2.405682 |
| H  | -0.682269 | -0.884774 | -0.943087 |
| H  | -0.914330 | -1.648803 | 1.376303  |
| H  | 2.970002  | -0.099887 | 2.296976  |
| H  | 3.187097  | 0.725375  | -0.014948 |
| H  | 2.096596  | 0.465502  | -8.175300 |
| H  | 1.054202  | -0.823417 | -8.798226 |
| H  | 3.583968  | -1.244495 | -7.126759 |
| H  | 3.444243  | -1.512612 | -8.872225 |
| H  | 2.537485  | -2.532995 | -7.740401 |
| H  | 2.386905  | 0.566054  | -2.266724 |
| H  | 0.283836  | -0.010259 | -6.768872 |

**B-VI' (complex)**

|    |           |           |           |
|----|-----------|-----------|-----------|
| C  | -2.928231 | -0.017827 | 1.922836  |
| C  | -2.429425 | -0.400925 | 0.688151  |
| C  | -1.179232 | 0.037897  | 0.280769  |
| C  | -0.414373 | 0.841821  | 1.121846  |
| C  | -0.927259 | 1.219963  | 2.359581  |
| C  | -2.184179 | 0.798657  | 2.759735  |
| Br | -4.647567 | -0.611085 | 2.468672  |
| N  | 0.864420  | 1.302784  | 0.755096  |
| C  | 1.694500  | 0.743098  | -0.145271 |
| C  | 2.892934  | 1.256839  | -0.464787 |
| H  | 1.217615  | 2.119302  | 1.235450  |
| H  | 1.318118  | -0.175506 | -0.591968 |
| H  | -0.820220 | -0.240269 | -0.701519 |
| H  | -3.021360 | -1.023112 | 0.030505  |
| H  | -2.574723 | 1.095302  | 3.723868  |
| H  | -0.338049 | 1.846681  | 3.019384  |
| C  | 3.962774  | 1.089180  | -1.129919 |
| O  | 5.005567  | 1.018068  | -1.662775 |
| C  | 6.608387  | -2.569420 | -3.316405 |
| C  | 5.258753  | -2.510050 | -2.625836 |
| O  | 4.418232  | -1.498536 | -3.163451 |
| H  | 4.717922  | -3.448115 | -2.762450 |
| H  | 5.389284  | -2.359475 | -1.547185 |
| H  | 7.214236  | -3.382269 | -2.907411 |
| H  | 6.483668  | -2.734024 | -4.388205 |
| H  | 7.160158  | -1.636358 | -3.174902 |
| H  | 4.833183  | -0.644573 | -2.988624 |
| C  | 2.044081  | -0.152383 | -3.638128 |
| O  | 2.703447  | 0.565205  | -4.257698 |
| O  | 1.339808  | -0.838413 | -3.024811 |



TS-B-VI''

|    |           |           |           |
|----|-----------|-----------|-----------|
| C  | -0.004916 | -0.508559 | -0.454896 |
| C  | -0.254315 | -0.131640 | 0.855493  |
| C  | 0.809909  | 0.112801  | 1.707604  |
| C  | 2.115178  | -0.028255 | 1.253357  |
| C  | 2.359117  | -0.425572 | -0.055035 |
| C  | 1.295310  | -0.655466 | -0.912881 |
| N  | 3.175021  | 0.225317  | 2.165231  |
| C  | 4.407933  | 0.584329  | 1.834845  |
| C  | 5.496853  | 0.814357  | 2.649930  |
| C  | 6.883478  | 1.196009  | 1.876982  |
| O  | 7.890563  | 1.185487  | 2.586464  |
| Br | -1.456339 | -0.836617 | -1.630138 |
| C  | 5.326370  | 0.811759  | 3.984720  |
| O  | 4.984605  | 0.942393  | 5.065776  |
| O  | 7.299731  | -0.518626 | 4.484728  |
| C  | 8.041120  | -0.589835 | 5.692121  |
| C  | 8.453818  | 0.774765  | 6.217582  |
| O  | 6.672068  | 1.429009  | 0.698978  |
| H  | 4.630828  | 0.734816  | 0.780560  |
| H  | 3.368947  | -0.575795 | -0.413681 |
| H  | 1.482838  | -0.963620 | -1.932458 |
| H  | -1.270370 | -0.020398 | 1.208938  |
| H  | 0.618341  | 0.425926  | 2.727794  |
| H  | 8.927209  | -1.217516 | 5.539152  |
| H  | 7.403592  | -1.103385 | 6.415636  |
| H  | 9.073974  | 1.300220  | 5.488097  |
| H  | 9.029124  | 0.668343  | 7.140860  |
| H  | 7.579612  | 1.393788  | 6.429990  |
| H  | 2.937341  | 0.125536  | 3.144093  |
| H  | 7.778853  | 0.025399  | 3.818479  |

**B-VI''**

|    |           |           |           |
|----|-----------|-----------|-----------|
| C  | 0.006554  | 0.018914  | -0.010869 |
| C  | 0.003468  | 0.030375  | 1.375607  |
| C  | 1.193881  | 0.040201  | 2.086051  |
| C  | 2.401620  | 0.035904  | 1.406119  |
| C  | 2.410119  | 0.045999  | 0.017208  |
| C  | 1.213891  | 0.031809  | -0.689136 |
| Br | -1.646497 | 0.022653  | 2.309333  |
| N  | 3.627219  | 0.053831  | -0.714921 |
| C  | 4.774281  | 0.568979  | -0.293480 |
| C  | 5.995576  | 0.582660  | -0.922300 |
| C  | 7.191637  | 1.491481  | -0.213437 |
| O  | 6.906099  | 1.736677  | 0.941703  |
| C  | 6.294047  | -0.099462 | -2.029698 |
| O  | 6.618709  | -0.746920 | -2.908887 |
| O  | 8.112614  | 1.751905  | -0.980611 |
| O  | 6.869343  | 2.221258  | -3.388995 |
| C  | 7.634922  | 2.383040  | -4.570210 |
| C  | 8.300760  | 3.745529  | -4.647435 |
| H  | 3.580276  | -0.329149 | -1.650198 |
| H  | 4.774721  | 1.071061  | 0.671349  |
| H  | 3.326525  | 0.007740  | 1.967681  |
| H  | 1.183733  | 0.034933  | 3.167577  |
| H  | -0.925332 | 0.010485  | -0.559703 |
| H  | 1.220275  | 0.045346  | -1.773148 |
| H  | 6.941052  | 2.252259  | -5.403757 |
| H  | 8.390185  | 1.589778  | -4.646317 |
| H  | 8.859591  | 3.850023  | -5.581432 |
| H  | 7.553285  | 4.539707  | -4.598475 |
| H  | 8.998966  | 3.882580  | -3.818161 |
| H  | 7.462712  | 2.252408  | -2.615109 |

**B-VI (ketene)**

|    |           |           |           |
|----|-----------|-----------|-----------|
| C  | 0.142698  | -0.616604 | 0.076474  |
| C  | 0.047934  | -0.135095 | 1.370973  |
| C  | 1.159116  | 0.445976  | 1.965228  |
| C  | 2.364141  | 0.552448  | 1.270102  |
| C  | 2.444578  | 0.030976  | -0.021216 |
| C  | 1.337537  | -0.539871 | -0.624882 |
| Br | -1.378312 | -1.414555 | -0.742973 |
| N  | 3.519825  | 1.116824  | 1.832161  |
| C  | 3.428747  | 2.188857  | 2.509385  |
| C  | 4.566842  | 2.796289  | 3.169967  |
| H  | 1.404188  | -0.930635 | -1.631587 |
| H  | 3.389315  | 0.087559  | -0.547053 |
| H  | -0.881341 | -0.221292 | 1.918441  |
| H  | 1.095206  | 0.791257  | 2.990082  |
| H  | 2.481525  | 2.726848  | 2.624267  |
| H  | 4.482884  | 3.729320  | 3.708737  |
| C  | 5.759021  | 2.225098  | 3.130271  |
| O  | 6.799308  | 1.742869  | 3.102984  |

B-VI'

|    |           |           |           |
|----|-----------|-----------|-----------|
| C  | -0.006754 | 0.061781  | -0.027284 |
| C  | -0.015773 | 0.028331  | 1.364960  |
| C  | 1.175895  | -0.022148 | 2.073964  |
| C  | 2.378025  | -0.054786 | 1.389679  |
| C  | 2.400572  | -0.030341 | 0.003028  |
| C  | 1.213176  | 0.037680  | -0.704634 |
| Br | 4.013943  | -0.133277 | 2.358105  |
| N  | -1.197570 | 0.158711  | -0.763519 |
| C  | -2.530842 | -0.108943 | -0.306773 |
| C  | -2.951116 | -0.773520 | -1.388754 |
| C  | -1.560914 | -0.642062 | -1.940570 |
| O  | -0.908636 | -1.004047 | -2.857938 |
| H  | 1.224585  | 0.068152  | -1.785702 |
| H  | 3.343692  | -0.055563 | -0.526454 |
| H  | 1.161828  | -0.043532 | 3.155564  |
| H  | -0.951337 | 0.040605  | 1.909931  |
| H  | -2.966025 | 0.231275  | 0.620498  |
| H  | -3.885621 | -1.157189 | -1.757336 |

TS-B-VII

|    |           |           |           |
|----|-----------|-----------|-----------|
| C  | 0.357152  | -0.541413 | 1.207459  |
| C  | -0.995285 | -0.249263 | 1.201019  |
| C  | -1.671268 | -0.104298 | 0.000119  |
| C  | -0.995446 | -0.252586 | -1.200463 |
| C  | 0.356984  | -0.544784 | -1.206274 |
| C  | 1.060456  | -0.694051 | 0.000754  |
| Br | -3.532887 | 0.300382  | -0.000315 |
| N  | 2.372257  | -0.983741 | 0.001048  |
| C  | 3.588608  | -1.223061 | 0.001068  |
| C  | 4.678342  | -0.237086 | 0.000043  |
| C  | 4.439732  | 1.060954  | -0.001062 |
| O  | 4.216792  | 2.186800  | -0.002017 |
| H  | 3.961762  | -2.259167 | 0.001958  |
| H  | -1.522369 | -0.135026 | 2.139422  |
| H  | 0.883557  | -0.655974 | 2.146241  |
| H  | -1.522656 | -0.140954 | -2.139109 |
| H  | 0.883258  | -0.661965 | -2.144805 |
| H  | 5.711702  | -0.554983 | 0.000141  |

**TS-B-VII'**

|    |           |           |           |
|----|-----------|-----------|-----------|
| C  | 0.029954  | -0.101428 | -0.072212 |
| C  | -0.019209 | 0.038189  | 1.317122  |
| C  | 1.148921  | 0.105767  | 2.060749  |
| C  | 2.373853  | 0.067901  | 1.415082  |
| C  | 2.443141  | -0.041760 | 0.033843  |
| C  | 1.275672  | -0.133038 | -0.702892 |
| Br | 3.977652  | 0.181841  | 2.431499  |
| N  | -1.109432 | -0.206243 | -0.863794 |
| C  | -2.370326 | -0.377895 | -0.485710 |
| C  | -3.112147 | 0.195639  | -1.508370 |
| C  | -1.990912 | 0.682937  | -2.209183 |
| O  | -1.492433 | 1.296318  | -3.057517 |
| H  | -2.696347 | -0.848128 | 0.436846  |
| H  | -0.972981 | 0.110350  | 1.825622  |
| H  | 1.102997  | 0.207382  | 3.137010  |
| H  | 3.403868  | -0.065278 | -0.463006 |
| H  | 1.314505  | -0.235987 | -1.779951 |
| H  | -4.151964 | 0.214550  | -1.781860 |

**B-VII**

|    |           |           |           |
|----|-----------|-----------|-----------|
| C  | -0.064064 | 0.042593  | 0.058867  |
| C  | -0.075940 | 0.089106  | 1.453250  |
| C  | 1.134362  | 0.043231  | 2.145834  |
| C  | 2.332370  | -0.081588 | 1.460344  |
| C  | 2.322642  | -0.149818 | 0.075955  |
| C  | 1.131852  | -0.082237 | -0.630261 |
| N  | -1.286549 | 0.235642  | 2.148379  |
| C  | -1.918479 | -0.804290 | 2.511796  |
| C  | -1.579195 | -2.208506 | 2.317579  |
| C  | -0.513661 | -2.701827 | 1.705759  |
| O  | 0.370612  | -3.231191 | 1.198064  |
| Br | 3.965568  | -0.322120 | -0.867432 |
| H  | -2.853044 | -0.649331 | 3.048434  |
| H  | 3.268444  | -0.123485 | 2.001330  |
| H  | 1.128656  | 0.108557  | 3.226985  |
| H  | 1.136438  | -0.124639 | -1.711388 |
| H  | -1.000731 | 0.107422  | -0.481169 |
| H  | -2.252303 | -2.963756 | 2.704511  |

**TS-B-VIII**

|    |           |           |           |
|----|-----------|-----------|-----------|
| C  | 0.009609  | 0.006074  | 0.013064  |
| C  | 0.012515  | 0.002128  | 1.377972  |
| C  | 1.234377  | -0.003717 | 2.091922  |
| C  | 2.451976  | 0.039685  | 1.358447  |
| C  | 2.420013  | 0.070631  | -0.069443 |
| C  | 1.226744  | 0.029282  | -0.713560 |
| N  | 1.211078  | -0.123562 | 3.436313  |
| C  | 2.195744  | -0.779475 | 4.004106  |
| C  | 3.265441  | -1.457776 | 3.395203  |
| C  | 3.601940  | -1.368697 | 2.058734  |
| O  | 4.408064  | -1.710369 | 1.272606  |
| Br | 1.148813  | 0.023250  | -2.611551 |
| H  | 2.121854  | -0.876623 | 5.084535  |
| H  | 3.351894  | 0.103467  | -0.618413 |
| H  | 3.259365  | 0.609241  | 1.824080  |
| H  | -0.926668 | -0.018060 | -0.529832 |
| H  | -0.909621 | -0.021840 | 1.943849  |
| H  | 3.790321  | -2.222373 | 3.955024  |



**B-VIII**

|    |           |           |           |
|----|-----------|-----------|-----------|
| C  | -0.007118 | -0.016745 | 0.000267  |
| C  | -0.003063 | -0.023253 | 1.445392  |
| C  | 1.152476  | -0.000661 | 2.132783  |
| C  | 2.434262  | 0.028370  | 1.450130  |
| C  | 2.530013  | -0.070410 | 0.124981  |
| C  | 1.301160  | -0.288582 | -0.688374 |
| Br | 3.980033  | 0.253925  | 2.532348  |
| N  | -1.112453 | 0.173965  | -0.637549 |
| C  | -1.049339 | 0.298207  | -2.015037 |
| C  | 0.074554  | 0.337771  | -2.761046 |
| C  | 1.377321  | 0.213295  | -2.127739 |
| O  | 2.439678  | 0.406599  | -2.674866 |
| H  | -2.016735 | 0.424754  | -2.489226 |
| H  | -0.963551 | 0.017787  | 1.942610  |
| H  | 1.146720  | 0.034311  | 3.214646  |
| H  | 3.472116  | -0.028357 | -0.404569 |
| H  | 1.245554  | -1.383563 | -0.872079 |
| H  | 0.041281  | 0.549558  | -3.821819 |

**TS-B-IX**

|    |           |           |           |
|----|-----------|-----------|-----------|
| C  | -0.005202 | 0.008052  | -0.004997 |
| C  | -0.000169 | 0.003416  | 1.407936  |
| C  | 1.158271  | -0.004189 | 2.157318  |
| C  | 2.406582  | -0.004348 | 1.540020  |
| C  | 2.499318  | -0.046626 | 0.143579  |
| C  | 1.277044  | -0.013830 | -0.654667 |
| Br | 3.979771  | 0.047316  | 2.573459  |
| N  | -1.152184 | 0.063051  | -0.677881 |
| C  | -1.042808 | 0.104872  | -2.015157 |
| C  | 0.119831  | 0.087837  | -2.756794 |
| C  | 1.395758  | -0.000953 | -2.132942 |
| O  | 2.503907  | -0.059923 | -2.668352 |
| H  | 3.432112  | 0.058275  | -0.398022 |
| H  | 1.100207  | -0.000338 | 3.237910  |
| H  | -0.965557 | 0.011807  | 1.899903  |
| H  | -1.990562 | 0.155491  | -2.543925 |
| H  | 2.020811  | -1.117855 | -0.213670 |
| H  | 0.080316  | 0.136127  | -3.837074 |

**B-IX**

|    |           |           |           |
|----|-----------|-----------|-----------|
| C  | 0.001467  | 0.010524  | 0.001491  |
| C  | 0.003807  | 0.000883  | 1.361959  |
| C  | 1.236659  | -0.009117 | 2.040315  |
| C  | 2.482929  | -0.009848 | 1.405881  |
| C  | 2.496589  | -0.000118 | -0.001404 |
| C  | 1.244082  | 0.011514  | -0.778251 |
| Br | -1.623075 | 0.023763  | -0.934586 |
| N  | 3.586235  | -0.020390 | 2.194522  |
| C  | 4.729865  | -0.021061 | 1.526332  |
| C  | 4.868432  | -0.012208 | 0.139654  |
| C  | 3.743893  | -0.000922 | -0.738920 |
| O  | 3.764181  | 0.007605  | -1.980051 |
| H  | 5.628355  | -0.029375 | 2.137743  |
| H  | 1.247662  | -0.017001 | 3.125730  |
| H  | -0.921526 | 0.000661  | 1.921647  |
| H  | 1.252343  | -0.830544 | -1.488271 |
| H  | 1.259068  | 0.866593  | -1.472609 |
| H  | 5.858721  | -0.013791 | -0.299536 |

TS-B-X

|    |           |           |           |
|----|-----------|-----------|-----------|
| C  | -0.004552 | 0.014101  | -0.003281 |
| C  | -0.004211 | 0.010413  | 1.406768  |
| C  | 1.172489  | -0.004152 | 2.150550  |
| C  | 2.404398  | 0.058149  | 1.517473  |
| C  | 2.504211  | 0.070650  | 0.098224  |
| C  | 1.247712  | -0.032459 | -0.604117 |
| Br | 3.955883  | 0.288368  | 2.556991  |
| N  | -1.154238 | -0.085608 | -0.717923 |
| C  | -0.985941 | -0.305712 | -2.010203 |
| C  | 0.231654  | -0.544050 | -2.676635 |
| C  | 1.421346  | -0.507733 | -1.942762 |
| O  | 2.613243  | -0.847840 | -2.235761 |
| H  | -1.901619 | -0.367084 | -2.592388 |
| H  | -0.962298 | -0.039641 | 1.913167  |
| H  | 1.124082  | -0.024316 | 3.230863  |
| H  | 3.207519  | 0.829218  | -0.268291 |
| H  | 3.027575  | -0.726031 | -0.712814 |
| H  | 0.228089  | -0.823048 | -3.722147 |

6(enol) (6-bromoquinolin-4(1H)-one)

|    |           |           |           |
|----|-----------|-----------|-----------|
| C  | -0.003206 | 0.000003  | -0.002302 |
| C  | -0.006840 | 0.000001  | 1.412477  |
| C  | 1.210505  | -0.000006 | 2.130342  |
| C  | 2.386979  | -0.000012 | 1.440128  |
| C  | 2.416415  | -0.000013 | 0.030387  |
| C  | 1.244138  | -0.000006 | -0.670033 |
| Br | 4.038239  | -0.000021 | 2.383799  |
| N  | -1.140124 | 0.000008  | -0.749841 |
| C  | -2.278275 | 0.000009  | -0.109071 |
| C  | -2.407709 | 0.000017  | 1.294548  |
| C  | -1.271880 | 0.000009  | 2.057097  |
| O  | -1.268431 | 0.000009  | 3.407870  |
| H  | 1.191401  | -0.000005 | 3.210874  |
| H  | 3.367891  | -0.000018 | -0.484625 |
| H  | 1.235266  | -0.000005 | -1.752386 |
| H  | -3.178042 | 0.000027  | -0.718282 |
| H  | -2.168538 | 0.000039  | 3.747117  |
| H  | -3.392483 | 0.000026  | 1.747971  |
